# Supplementary material for: New bimetallic complexes of late transition metals involving pyrazole-bridged bis N-heterocyclic carbene ligands
Source: Royal Society of Chemistry journal article supplement (doi:10.1039/b715212d), 2007-11-08
Supplement: b715212d.pdf [file b715212d.pdf]

**New Bimetallic Complexes of Late Transition Metals Involving Pyrazole-Bridged  
Bis *N*-Heterocyclic Carbene Ligands**

Sang-Jin Jeon and Robert M. Waymouth\*  
Department of Chemistry, Stanford University,  
Stanford, California 94305.

**Supporting Information**

| <b>Table of Contents</b>                                                       | <b>page</b> |
|--------------------------------------------------------------------------------|-------------|
| General Considerations                                                         | S2          |
| Synthesis of Ligand Precursors and Characterization of <b>1-3</b>              | S2          |
| Synthesis of Metal Carbene Complexes and Characterization of <b>4-6</b>        | S4          |
| References                                                                     | S6          |
| <sup>1</sup> H and <sup>13</sup> C{ <sup>1</sup> H} NMR spectra ( <b>1-6</b> ) | S7          |
| X-ray Structures and Tables for <b>2</b>                                       | S13         |
| X-ray Structures and Tables for <b>4</b>                                       | S23         |
| X-ray Structures and Tables for <b>5</b>                                       | S38         |
| X-ray Structures and Tables for <b>6</b>                                       | S67         |

**General Considerations.** All organometallic reactions were performed under an inert atmosphere of N<sub>2</sub> using standard Schlenk line or glove box techniques. Degassing of solvents was achieved via multiple freeze pump thaw cycles. 2,6-Diisopropyl-phenyl imidazole<sup>1</sup> and 3,5-Bis(chloromethyl)-1-(tetrahydro-2*H*-pyran-2-yl)-1*H*-pyrazole<sup>2</sup> were prepared by literature procedure. Sodium hexamethyldisilazane (NaHMDS), NiCl<sub>2</sub>(dme), [Rh(COD)Cl]<sub>2</sub>, and [Ir(COD)Cl]<sub>2</sub> were purchased from Strem and stored in an inert atmosphere. Celite was baked out at 140 °C prior to use. THF-*d*<sub>8</sub> and CD<sub>2</sub>Cl<sub>2</sub> were purchased from Cambridge Isotope, Inc., degassed, dried over sodium benzophenone and CaH<sub>2</sub> respectively, and vacuum transferred. DMSO-*d*<sub>6</sub> was purchased from Cambridge Isotope, Inc., fractionally distilled, and stored in activated 4Å molecular sieves prior to use. NMR spectra were taken on a Varian Unity Inova 500 MHz and Mercury 400 MHz NMR spectrometer. Chemical shifts were referenced to residual solvent peak. High resolution mass spectroscopy was performed at Stanford University Mass Spectrometry Laboratory. Elemental analyses were performed by Robertson Microlit Laboratories, Inc., Madison, N.J. X-ray diffraction study was performed by the X-ray crystallographic laboratory at the University of Minnesota. A single crystal was mounted on a Bruker-Siemens SMART Platform CCD diffractometer at 173(2) K and the data collection was carried out using MoKα radiation with a frame time of 30-45 seconds and a detector distance of 4.89-4.97 cm. The X-ray structures were solved using SHELXS-97 and refined using SHELXL-97.

### Synthesis of Ligand Precursors.

**3,5-Bis-[3-(2,6-diisopropyl-phenyl)-3*H*-imidazolium-1-ylmethyl]-1-(tetrahydro-pyran-2-yl)-1*H*-pyrazole diiodide (1).** 3,5-Bis(chloromethyl)-1-(tetrahydro-2*H*-pyran-2-yl)-1*H*-pyrazole (1.02 g, 4.09 mmol), 2,6-diisopropyl-phenyl imidazole (2.06 g, 9.01 mmol), and NaI (1.23 g, 8.18 mmol) were dissolved in extra dried acetone (70 mL). The reaction was stirred for 20 h at 60 °C and solvent was removed in vacuo. The resulting powder was redissolved in CH<sub>2</sub>Cl<sub>2</sub> (25 mL) and filtered through Celite. The filtrate was concentrated and poured into ether (60 mL) to precipitate the product. The pale yellow solids were collected on a Frit and dried in a vacuum (3.50 g, 96% yield). <sup>1</sup>H NMR (500

MHz, DMSO- $d_6$ ):  $\delta$  1.06-1.17 (m, 24H, isopropyl CH<sub>3</sub>), 1.41-1.52 (m, 1H, thp CH), 1.52-1.59 (m, 1H, thp CH), 1.61-1.74 (m, 1H, thp CH), 1.83-1.99 (m, 2H, thp CH<sub>2</sub>), 2.11-2.21 (m, 2H, isopropyl CH), 2.22-2.34 (m, 3H, 2H from isopropyl CH and 1H from thp CH), 3.66-3.70 (m, 2H, thp CH<sub>2</sub>), 5.64 (s, 2H, bridged CH<sub>2</sub>), 5.70 (dd, 1H,  $J = 9.5$  Hz, 2.5 Hz, thp CH), 5.84 (d, 1H,  $J = 15.5$  Hz, bridged CH<sub>2</sub>), 5.89 (d, 1H,  $J = 15.5$  Hz, bridged CH<sub>2</sub>), 6.76 (s, 1H, pyrazolyl CH), 7.43-7.48 (m, 4H, *m*-Ph), 7.61-7.66 (m, 2H, *p*-Ph), 8.11 (s, 2H, NCH), 8.14-8.17 (m, 2H, NCH), 9.59 (s, 1H, imidazolium CH), 9.70 (s, 1H, imidazolium CH). <sup>13</sup>C NMR (125 MHz, DMSO- $d_6$ ):  $\delta$  22.34 (thp CH<sub>2</sub>), 24.36-24.77 (8 isopropyl CH<sub>3</sub>), 25.25 (thp CH<sub>2</sub>), 28.67-28.78 (4 isopropyl CH), 29.24 (thp CH<sub>2</sub>), 43.73 (bridged CH<sub>2</sub>), 47.44 (bridged CH<sub>2</sub>), 67.16 (thp CH<sub>2</sub>), 84.45 (thp CH), 108.80 (pyrazolyl CH), 124.06 (NCH), 124.53 (NCH), 125.17 (*m*-Ph), 125.84 (NCH), 125.88 (NCH), 131.20 (*ipso*-Ph), 131.25 (*ipso*-Ph), 132.24 (*p*-Ph), 138.25 (imidazolium C), 138.75 (imidazolium C), 145.67, 145.73 (*o*-Ph), 145.74, 145.78 (pyrazolyl C). HRMS calcd for C<sub>40</sub>H<sub>54</sub>N<sub>6</sub>ONaI<sub>2</sub> (M + Na)<sup>+</sup>: 911.2346, found 911.2347.

**3,5-Bis-[3-(2,6-diisopropyl-phenyl)-3*H*-imidazolium-1-ylmethyl]-1*H*-pyrazole diiodide (2).** The N-thp protected salt **1** (3.50 g, 3.94 mmol) and pyridinium *p*-toluenesulfonate (1.55 g, 6.17 mmol) were dissolved in ethanol (35 mL) and stirred for 12 h at 55 °C. The resulting cloudy yellow reaction mixture was filtered to give an off-white solid, which was washed with ether (30 mL), and dried in vacuo (1.70 g, 54% yield). The filtrate was evaporated and purified by column chromatography on silica gel (CH<sub>2</sub>Cl<sub>2</sub> / acetone : 1 / 1) to obtain an additional 0.54 g of material (combined yield: 71%). <sup>1</sup>H NMR (500 MHz, DMSO- $d_6$ ):  $\delta$  1.13 (d, 24H,  $J = 7$  Hz, isopropyl CH<sub>3</sub>), 2.27 (m, 4H, isopropyl CH), 5.70 (br, 4H, bridged CH<sub>2</sub>), 6.59 (s, 1H, pyrazolyl CH), 7.46 (d, 4H,  $J = 8$  Hz, *m*-Ph), 7.63 (t, 2H,  $J = 8$  Hz, *p*-Ph), 8.11 (s, 2H, NCH), 8.16 (s, 2H, NCH), 9.70 (s, 2H, imidazolium CH). <sup>13</sup>C NMR (125 MHz, DMSO- $d_6$ ):  $\delta$  24.58 (8 isopropyl CH<sub>3</sub>), 28.76 (4 isopropyl CH), 44.42 (bridged CH<sub>2</sub>), 47.52 (bridged CH<sub>2</sub>), 105.67 (pyrazolyl CH), 124.16 (NCH), 125.18 (*m*-Ph), 125.96 (NCH), 131.20 (*ipso*-Ph), 132.25 (*p*-Ph), 138.72 (imidazolium C), 145.78 (*o*-Ph, pyrazolyl C). HRMS calcd for C<sub>35</sub>H<sub>46</sub>N<sub>6</sub>I (M - I)<sup>+</sup>: 677.2829, found 677.2825.

**3,5-Bis-[3-(2,6-diisopropyl-phenyl)-3*H*-imidazolium-1-ylmethyl]-1*H*-pyrazole dihexafluorophosphate (3).** To a solution of deprotected salt **2** (986 mg, 1.23 mmol) in MeOH / H<sub>2</sub>O (15 mL / 12 mL) was added NH<sub>4</sub>PF<sub>6</sub> (601 mg, 3.69 mmol). The clear solution immediately turned cloudy and was stirred for 2 h. The reaction mixture was filtered, washed with water (10 mL) and ether (10 mL), and dried under vacuum to give an off-white product (972 mg, 94% yield). <sup>1</sup>H NMR (500 MHz, DMSO-*d*<sub>6</sub>): δ 1.12 (d, 24H, *J* = 7 Hz, isopropyl CH<sub>3</sub>), 2.22-2.26 (m, 4H, isopropyl CH), 5.61 (br, 4H, bridged CH<sub>2</sub>), 6.50 (s, 1H, pyrazolyl CH), 7.45 (d, 4H, *J* = 8 Hz, *m*-Ph), 7.62 (t, 2H, *J* = 8 Hz, *p*-Ph), 8.03 (s, 2H, NCH), 8.13 (s, 2H, NCH), 9.60 (s, 2H, imidazolium CH). <sup>13</sup>C NMR (125 MHz, DMSO-*d*<sub>6</sub>): δ 24.49 (isopropyl CH<sub>3</sub>), 28.75 (isopropyl CH), 44.46 (bridged CH<sub>2</sub>), 47.50 (bridged CH<sub>2</sub>), 105.53 (pyrazolyl CH), 123.97, 124.29 (NCH), 125.16 (*m*-Ph), 125.79, 126.16 (NCH), 131.28 (*ipso*-Ph), 132.25 (*p*-Ph), 138.10, 138.75 (imidazolium C), 145.77 (*o*-Ph), 146.82 (pyrazolyl C). <sup>19</sup>F NMR (376 MHz, DMSO-*d*<sub>6</sub>): δ -70.54 (d, *J* = 712 Hz). <sup>31</sup>P NMR (162 MHz, DMSO-*d*<sub>6</sub>): δ -143.12 (sept, *J* = 712 Hz). HRMS calcd for C<sub>35</sub>H<sub>46</sub>N<sub>6</sub>F<sub>6</sub>P (M – PF<sub>6</sub>)<sup>+</sup>: 695.3426, found 695.3433.

### Synthesis of Metal Carbene Complexes.

**(dIPrpy)<sub>2</sub>Ni<sup>2+</sup>(PF<sub>6</sub>)<sub>2</sub> complex 4.** In a nitrogen glove box, the ligand precursor **3** (84.1 mg, 0.1 mmol) and NaHMDS (57.9 mg, 0.3 mmol) were dissolved in THF (3 mL) and stirred at room temperature. After 15 min, this reaction mixture was added to the flask containing NiCl<sub>2</sub>(dme) (44 mg, 0.2 mmol) rinsing with THF (3 mL). The resulting red-brown cloudy solution was stirred for 10 h and then removed from the box. Solvent was removed in vacuo and the residue was column chromatographed on silica gel (CH<sub>2</sub>Cl<sub>2</sub> / acetone : 9 / 1) to give the product as a orange-red solid (56 mg, 74.5 % yield). Slow evaporation of CH<sub>2</sub>Cl<sub>2</sub> / THF solution yielded X-ray-quality crystals. <sup>1</sup>H NMR (500 MHz, CD<sub>2</sub>Cl<sub>2</sub>): δ 0.27 (d, 6H, *J* = 6.5 Hz, isopropyl CH<sub>3</sub>), 0.75 (d, 6H, *J* = 6.5 Hz, isopropyl CH<sub>3</sub>), 0.78 (d, 6H, *J* = 6.5 Hz, isopropyl CH<sub>3</sub>), 1.06 (d, 6H, *J* = 6.5 Hz, isopropyl CH<sub>3</sub>), 2.19-2.25 (m, 2H, isopropyl CH), 3.07 (d, 2H, *J* = 16.5 Hz, bridged CH<sub>2</sub>), 3.12-3.17 (m, 2H, isopropyl CH), 4.78 (d, 2H, *J* = 16.5 Hz, bridged CH<sub>2</sub>), 6.23 (s, 1H, pyrazolyl CH), 7.01 (d, 2H, *J* = 2 Hz, NCH), 7.10 (d, 2H, *J* = 2 Hz, NCH), 7.27 (d,

2H,  $J = 8$  Hz, *m*-Ph), 7.36 (d, 2H,  $J = 8$  Hz, *m*-Ph), 7.63 (t, 2H,  $J = 7.5$  Hz, *p*-Ph).  $^{13}\text{C}$  NMR (125 MHz,  $\text{CD}_2\text{Cl}_2$ ):  $\delta$  19.59, 22.92, 27.07, 27.25, 28.02, 30.52 (isopropyl CH and  $\text{CH}_3$ ), 47.23 (bridged  $\text{CH}_2$ ), 102.88 (pyrazolyl CH), 122.37 (NCH), 124.62 (*m*-Ph), 125.46 (*m*-Ph), 127.22 (NCH), 131.89 (*p*-Ph), 134.38 (*ipso*-Ph), 145.45 (*o*-Ph), 145.88 (*o*-Ph), 148.85 (pyrazolyl C), 153.22 (carbene).  $^{19}\text{F}$  NMR (376 MHz,  $\text{CD}_2\text{Cl}_2$ ):  $\delta$  -72.65 (d,  $J = 712$  Hz).  $^{31}\text{P}$  NMR (162 MHz,  $\text{CD}_2\text{Cl}_2$ ):  $\delta$  -143.01 (sept,  $J = 712$  Hz). Anal. Calcd for  $\text{C}_{70}\text{H}_{86}\text{F}_{12}\text{N}_{12}\text{Ni}_2\text{P}_2$ : C 55.94, H 5.77, N 11.18; Found: C 56.00, H 5.73, N 11.10.

**(dIPrpy)Rh<sub>2</sub><sup>+</sup>(COD)<sub>2</sub>(PF<sub>6</sub><sup>-</sup>) complex 5.** In a nitrogen glove box, the ligand precursor **3** (84.1 mg, 0.1 mmol) and NaHMDS (57.9 mg, 0.3 mmol) were dissolved in THF (3 mL) and stirred at room temperature. After 15 min, this reaction mixture was added to a solution of  $[\text{Rh}(\text{COD})\text{Cl}]_2$  (49.3 mg, 0.1 mmol) in THF (2 mL). The resulting dark yellow solution was stirred for 10 h and then removed from the box and filtered through Celite in air. The dark yellow filtrate was concentrated and purified by column chromatography on silica gel (DCM / MeOH : 97 / 3) to give the product as a dark yellow solid (95 mg, 85% yield). Slow diffusion of pentane into a  $\text{CH}_2\text{Cl}_2$  solution yielded X-ray-quality crystals.  $^1\text{H}$  NMR (500 MHz,  $\text{CD}_2\text{Cl}_2$ ):  $\delta$  0.73 (d, 6H,  $J = 7$  Hz, isopropyl  $\text{CH}_3$ ), 1.13 (d, 6H,  $J = 7$  Hz, isopropyl  $\text{CH}_3$ ), 1.17 (d, 6H,  $J = 7$  Hz, isopropyl  $\text{CH}_3$ ), 1.23 (d, 6H,  $J = 7$  Hz, isopropyl  $\text{CH}_3$ ), 1.58-1.64 (m, 2H,  $\text{CH}_{2\text{cod}}$ ), 1.65-1.74 (m, 2H,  $\text{CH}_{2\text{cod}}$ ), 1.95-2.07 (m, 7H,  $\text{CH}_{2\text{cod}}$ ), 2.14-2.24 (m, 7H,  $\text{CH}_{2\text{cod}}$ ), 2.31-2.40 (m, 2H, isopropyl CH), 2.93-3.05 (m, 2H, isopropyl CH), 3.28-3.31 (m, 2H,  $\text{CH}_{\text{cod}}$ ), 3.78-3.83 (m, 2H,  $\text{CH}_{\text{cod}}$ ), 4.03-4.06 (m, 2H,  $\text{CH}_{\text{cod}}$ ), 5.24 (d, 2H,  $J = 15.5$  Hz, bridged  $\text{CH}_2$ ), 5.72 (d, 2H,  $J = 15.5$  Hz, bridged  $\text{CH}_2$ ), 6.17-6.22 (m, 2H,  $\text{CH}_{\text{cod}}$ ), 6.44 (s, 1H, pyrazolyl CH), 6.79-6.80 (m, 2H, NCH), 7.25 (d, 2H,  $J = 8$  Hz, *m*-Ph), 7.31 (d, 2H,  $J = 8$  Hz, *m*-Ph), 7.31-7.32 (m, 2H, NCH), 7.47 (t, 2H,  $J = 8$  Hz, *p*-Ph).  $^{13}\text{C}$  NMR (125 MHz,  $\text{CD}_2\text{Cl}_2$ ):  $\delta$  22.75, 22.89, 25.14, 26.57 (isopropyl  $\text{CH}_3$ ), 27.83 ( $\text{CH}_{2\text{cod}}$ ), 28.27, 28.99 (isopropyl CH), 30.01 ( $\text{CH}_{2\text{cod}}$ ), 31.52 ( $\text{CH}_{2\text{cod}}$ ), 34.81 ( $\text{CH}_{2\text{cod}}$ ), 49.08 (bridged  $\text{CH}_2$ ), 74.08 (d,  $^1J_{\text{RhC}} = 12$  Hz,  $\text{CH}_{\text{cod}}$ ), 74.99 (d,  $^1J_{\text{RhC}} = 11$  Hz,  $\text{CH}_{\text{cod}}$ ), 93.83 (d,  $^1J_{\text{RhC}} = 8$  Hz,  $\text{CH}_{\text{cod}}$ ), 97.26 (d,  $^1J_{\text{RhC}} = 7$  Hz,  $\text{CH}_{\text{cod}}$ ), 101.42 (pyrazolyl CH), 121.34 (NCH), 123.80 (*m*-Ph), 124.47 (*m*-Ph), 125.07 (NCH), 130.46 (*p*-Ph), 135.94 (*ipso*-Ph), 144.63 (*o*-Ph), 145.37 (*o*-Ph), 146.47 (pyrazolyl C), 176.75 (d,  $^1J_{\text{Rh-Carbone}} = 52$  Hz).  $^{19}\text{F}$  NMR (376 MHz,  $\text{CD}_2\text{Cl}_2$ ):  $\delta$  -73.26 (d,  $J = 712$

Hz).  $^{31}\text{P}$  NMR (162 MHz,  $\text{CD}_2\text{Cl}_2$ ):  $\delta$  -143.22 (sept,  $J = 712$  Hz). Anal. Calcd for  $\text{C}_{51}\text{H}_{67}\text{F}_6\text{N}_6\text{Pr}_2$ : C 54.94, H 6.06, N 7.54; Found: C 54.72, H 6.11, N 7.42.

**(dIPrpy)Ir $_2^+$ (COD) $_2$ (PF $_6^-$ ) complex 6.** In a nitrogen glove box, the ligand precursor **3** (84.1 mg, 0.1 mmol) and NaHMDS (57.9 mg, 0.3 mmol) were dissolved in THF (3 mL) and stirred at room temperature. After 15 min, this reaction mixture was added to a solution of  $[\text{Ir}(\text{COD})\text{Cl}]_2$  (67.2 mg, 0.1 mmol) in THF (2 mL). The resulting orange-red solution was stirred for 10 h and then removed from the box and filtered through Celite in air. The orange-red filtrate was concentrated and purified by column chromatography on silica gel (DCM / MeOH : 97 / 3) to give the product as an orange crystalline solid (115 mg, 89% yield). Slow diffusion of pentane into a  $\text{CH}_2\text{Cl}_2$  solution yielded X-ray-quality crystals.  $^1\text{H}$  NMR (500 MHz,  $\text{CD}_2\text{Cl}_2$ ):  $\delta$  0.73 (d, 6H,  $J = 7$  Hz, isopropyl  $\text{CH}_3$ ), 0.93-1.09 (m, 2H,  $\text{CH}_{2\text{cod}}$ ), 1.14 (d, 6H,  $J = 7$  Hz, isopropyl  $\text{CH}_3$ ), 1.17 (d, 6H,  $J = 7$  Hz, isopropyl  $\text{CH}_3$ ), 1.19 (d, 6H,  $J = 7$  Hz, isopropyl  $\text{CH}_3$ ), 1.23-1.35 (m, 2H,  $\text{CH}_{2\text{cod}}$ ), 1.73-1.84 (m, 2H,  $\text{CH}_{2\text{cod}}$ ), 1.86-1.99 (m, 8H,  $\text{CH}_{2\text{cod}}$ ), 2.02-2.13 (m, 2H,  $\text{CH}_{2\text{cod}}$ ), 2.26-2.32 (m, 2H, isopropyl CH), 2.87-2.92 (m, 2H, isopropyl CH), 3.07-3.11 (m, 2H,  $\text{CH}_{\text{cod}}$ ), 3.37-3.42 (m, 2H,  $\text{CH}_{\text{cod}}$ ), 3.68-3.73 (m, 2H,  $\text{CH}_{\text{cod}}$ ), 5.23 (d, 2H,  $J = 15.5$  Hz, bridged  $\text{CH}_2$ ), 5.50 (d, 2H,  $J = 15.5$  Hz, bridged  $\text{CH}_2$ ), 5.49-5.56 (m, 2H,  $\text{CH}_{\text{cod}}$ ), 6.53 (s, 1H, pyrazolyl CH), 6.86 (s, 2H, NCH), 7.25 (d, 2H,  $J = 8$  Hz, *m*-Ph), 7.27 (d, 2H,  $J = 8$  Hz, *m*-Ph), 7.33 (s, 2H, NCH), 7.48 (t, 2H,  $J = 8$  Hz, *p*-Ph).  $^{13}\text{C}$  NMR (125 MHz,  $\text{CD}_2\text{Cl}_2$ ):  $\delta$  22.73, 22.79, 25.12, 26.52 (isopropyl  $\text{CH}_3$ ), 27.60 ( $\text{CH}_{2\text{cod}}$ ), 28.33, 29.10 (isopropyl CH), 29.76 ( $\text{CH}_{2\text{cod}}$ ), 33.16 ( $\text{CH}_{2\text{cod}}$ ), 36.30 ( $\text{CH}_{2\text{cod}}$ ), 48.85 (bridged  $\text{CH}_2$ ), 58.53 ( $\text{CH}_{\text{cod}}$ ), 60.04 ( $\text{CH}_{\text{cod}}$ ), 82.01 ( $\text{CH}_{\text{cod}}$ ), 84.80 ( $\text{CH}_{\text{cod}}$ ), 101.84 (pyrazolyl CH), 120.88 (NCH), 123.83 (*m*-Ph), 124.48 (*m*-Ph), 125.47 (NCH), 130.52 (*p*-Ph), 135.88 (*ipso*-Ph), 144.59 (*o*-Ph), 145.39 (*o*-Ph), 146.52 (pyrazolyl C), 173.03 (carbene).  $^{19}\text{F}$  NMR (376 MHz,  $\text{CD}_2\text{Cl}_2$ ):  $\delta$  -73.26 (d,  $J = 712$  Hz).  $^{31}\text{P}$  NMR (162 MHz,  $\text{CD}_2\text{Cl}_2$ ):  $\delta$  -143.25 (sept,  $J = 712$  Hz). Anal. Calcd for  $\text{C}_{51}\text{H}_{67}\text{F}_6\text{Ir}_2\text{N}_6\text{P}$ : C 47.36, H 5.22, N 6.50; Found: C 47.16, H 5.20, N 6.35.

## References.

- (1) Liu, J. P.; Chen, J. B.; Zhao, J. F.; Zhao, Y. H.; Li, L.; Zhang, H. B. *Synthesis* **2003**, 2661-2666.
- (2) Röder, J. C.; Meyer, F.; Pritzkow, H. *organometallics* **2001**, 20, 811-817.

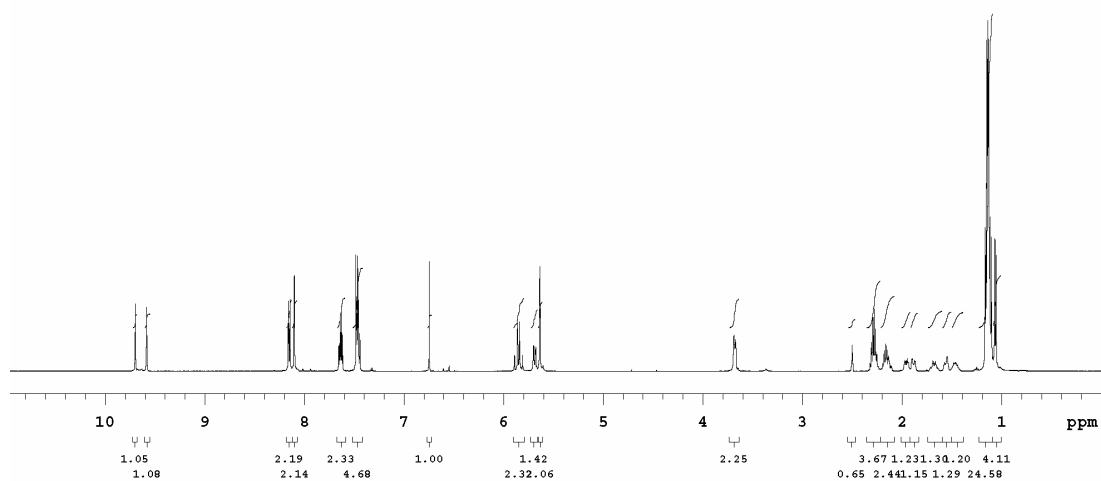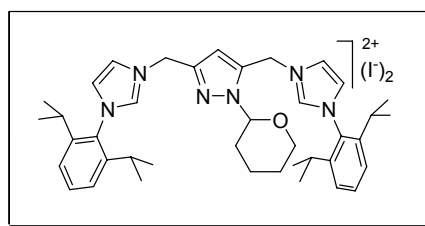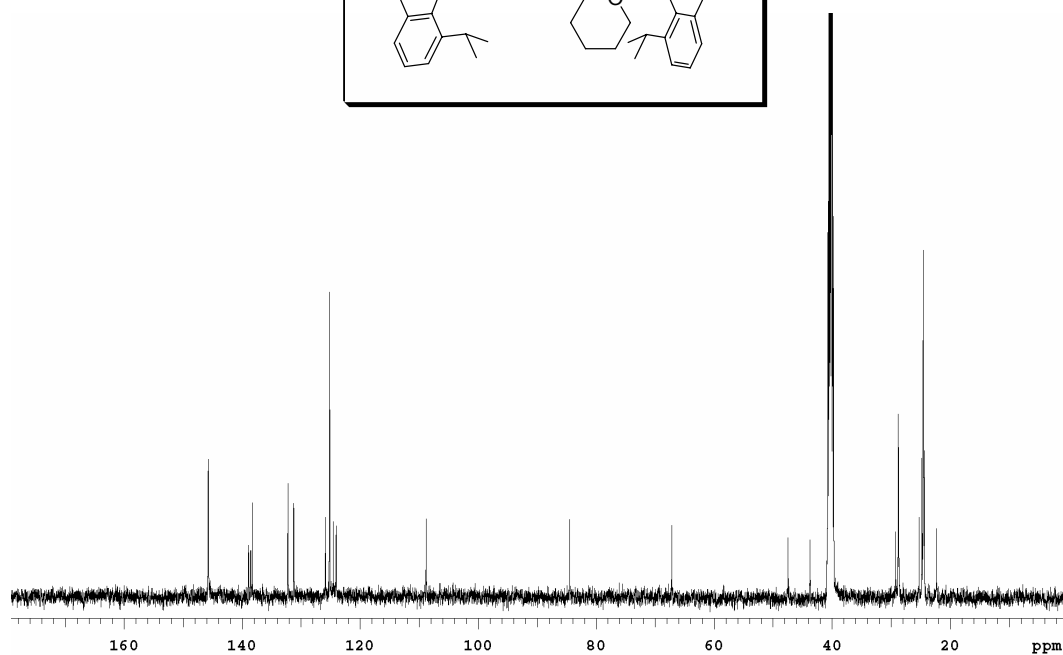

$^1\text{H}$  and  $^{13}\text{C}$  NMR of Salt 1 in  $\text{DMSO-}d_6$

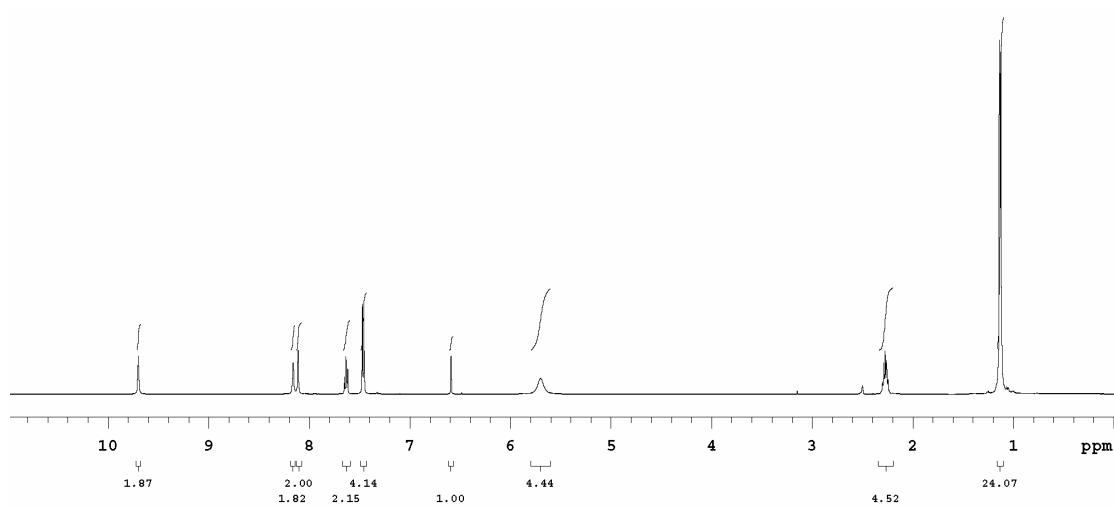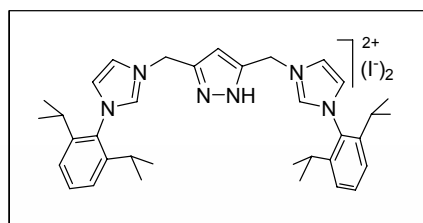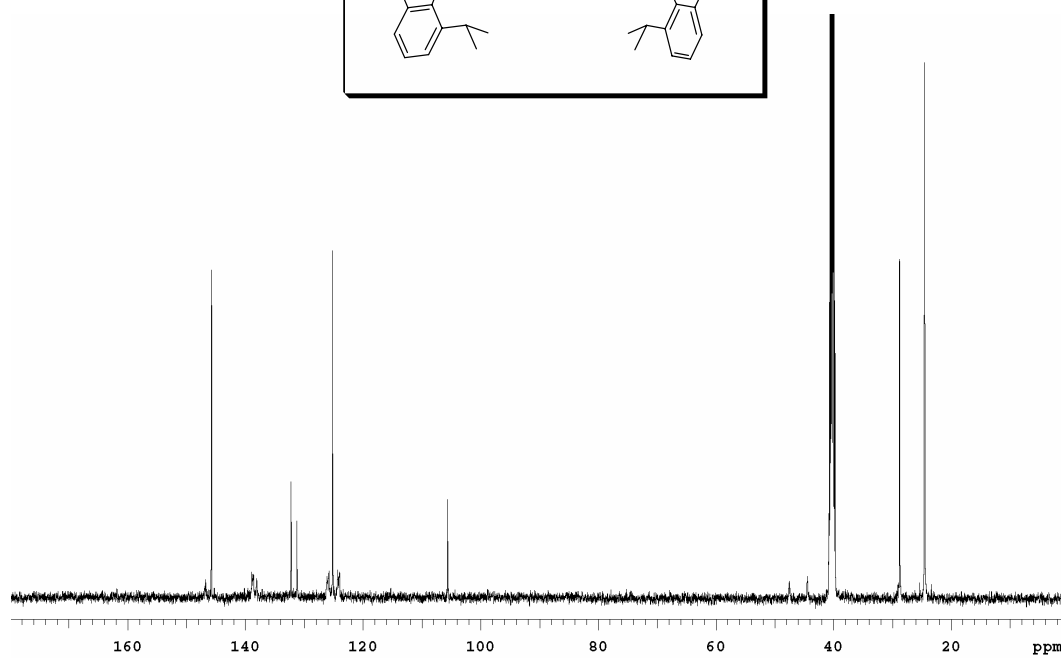

$^1\text{H}$  and  $^{13}\text{C}$  NMR of Salt 2 in  $\text{DMSO-}d_6$



Electronic Supplementary Information for Dalton Transactions  
This journal is © The Royal Society of Chemistry 2007

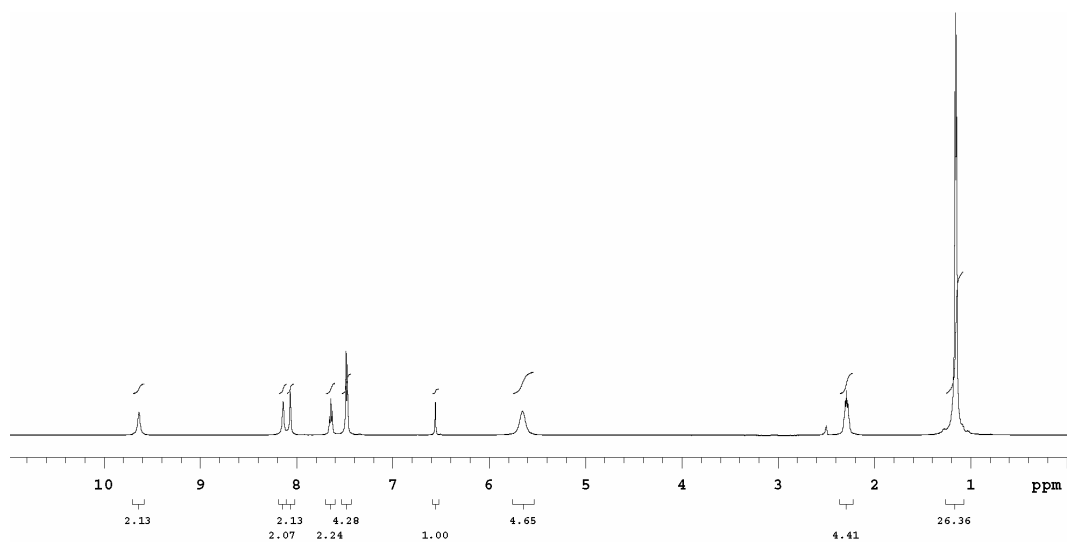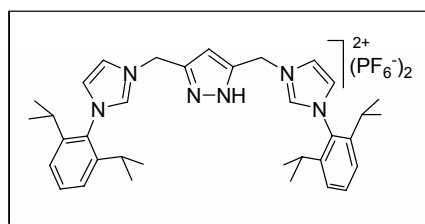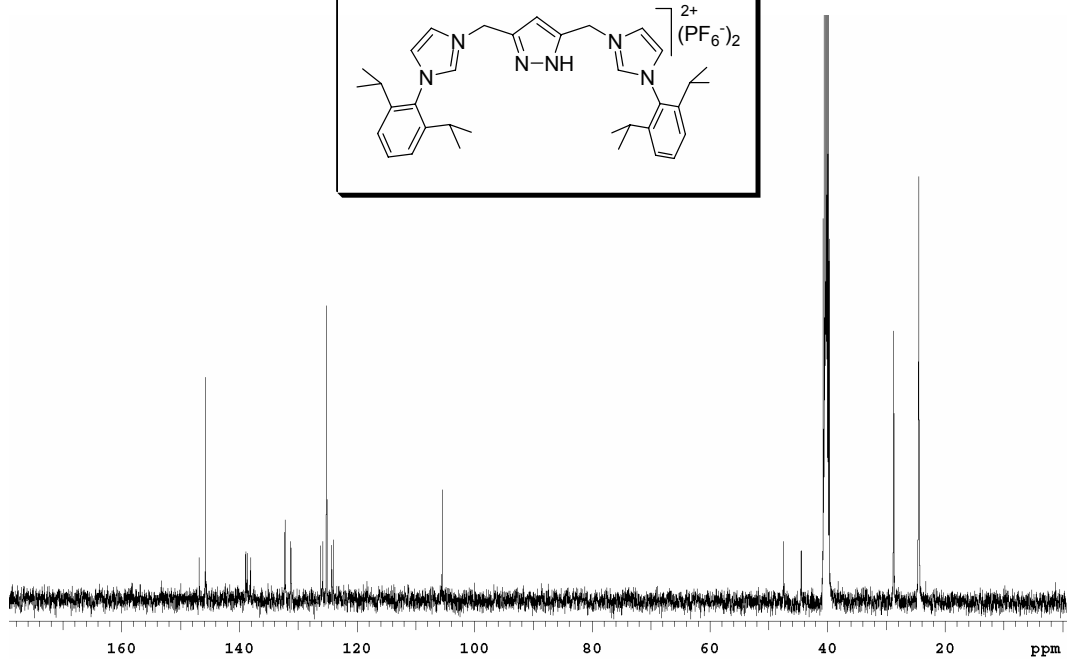

$^1\text{H}$  and  $^{13}\text{C}$  NMR of Salt 3 in  $\text{DMSO-}d_6$

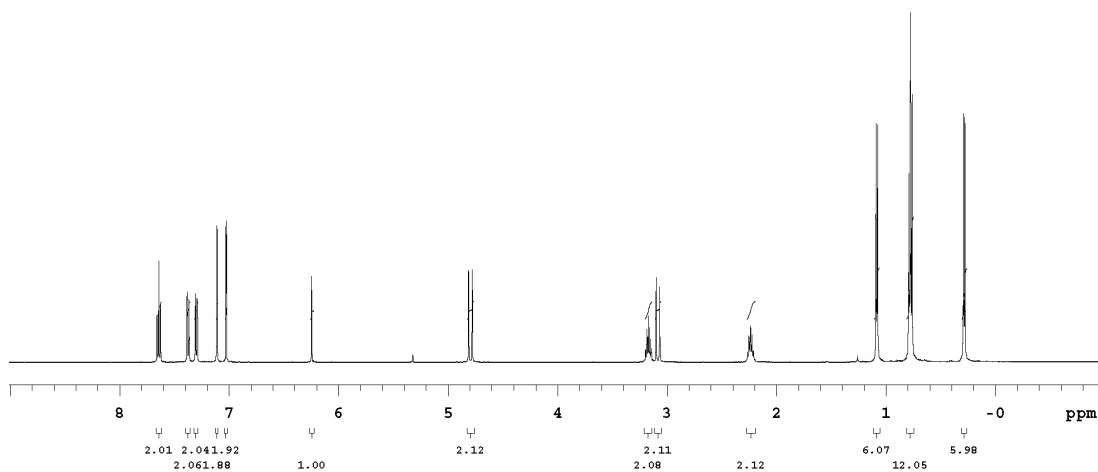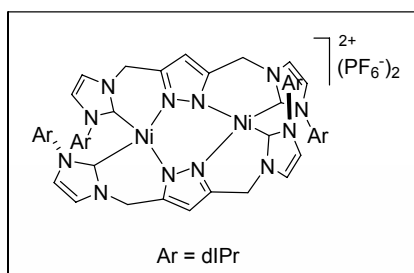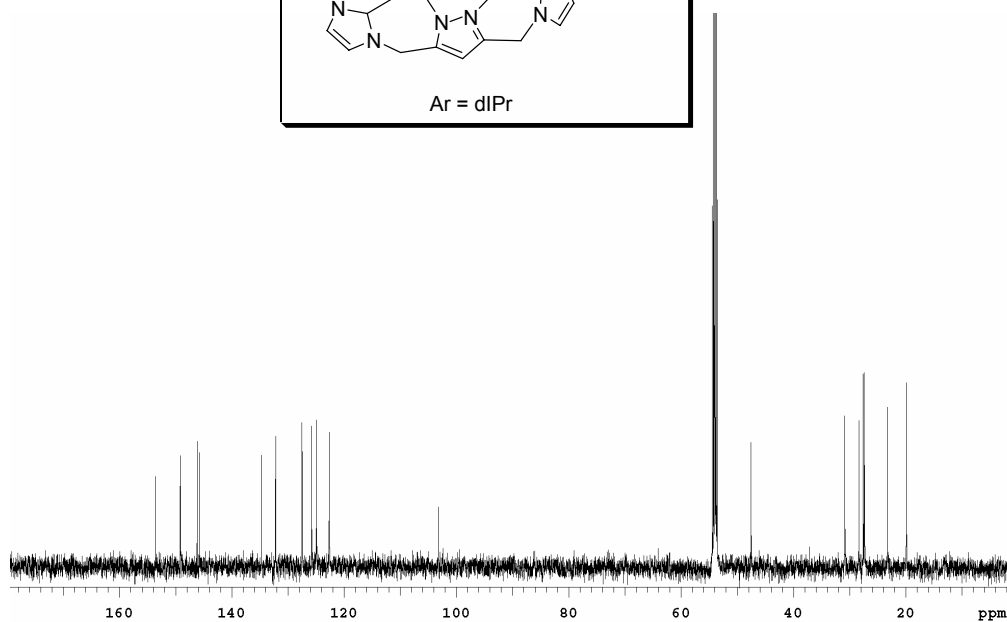

$^1\text{H}$  and  $^{13}\text{C}$  NMR of the Complex 4 (dicationic Ni dimer) in CD<sub>2</sub>Cl<sub>2</sub>

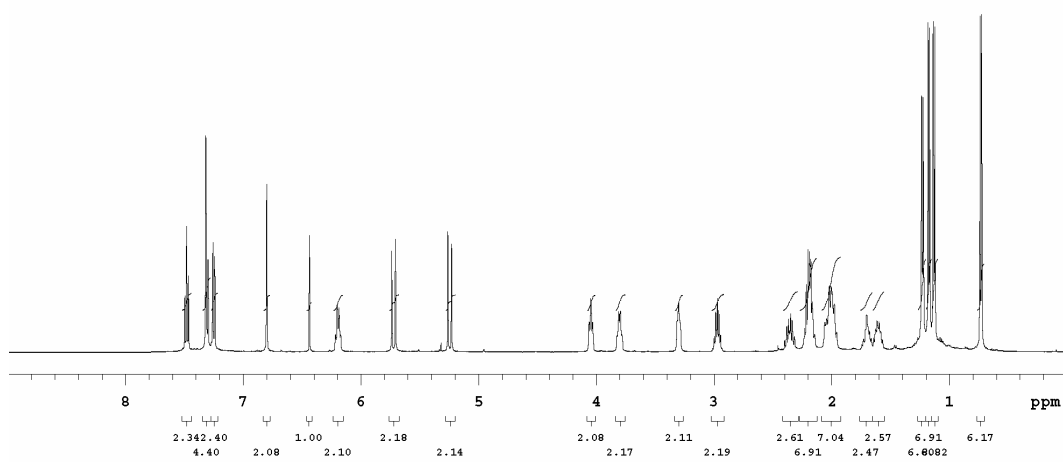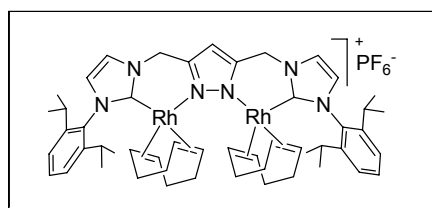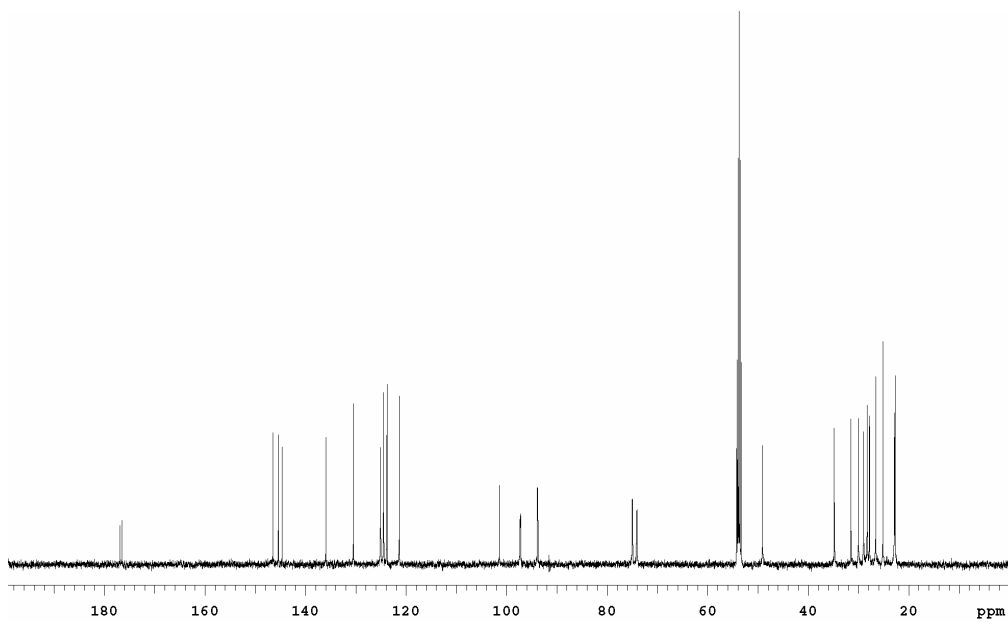

$^1\text{H}$  and  $^{13}\text{C}$  NMR of the Complex 5 (BisRh) in  $\text{CD}_2\text{Cl}_2$

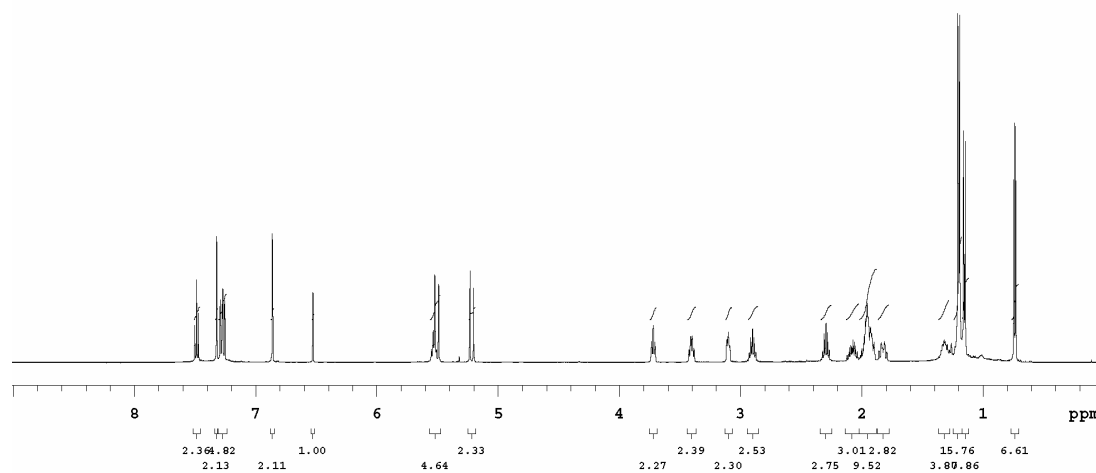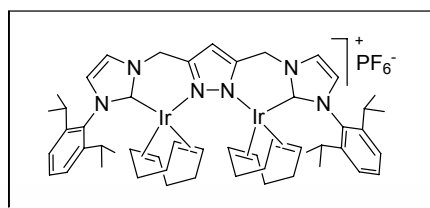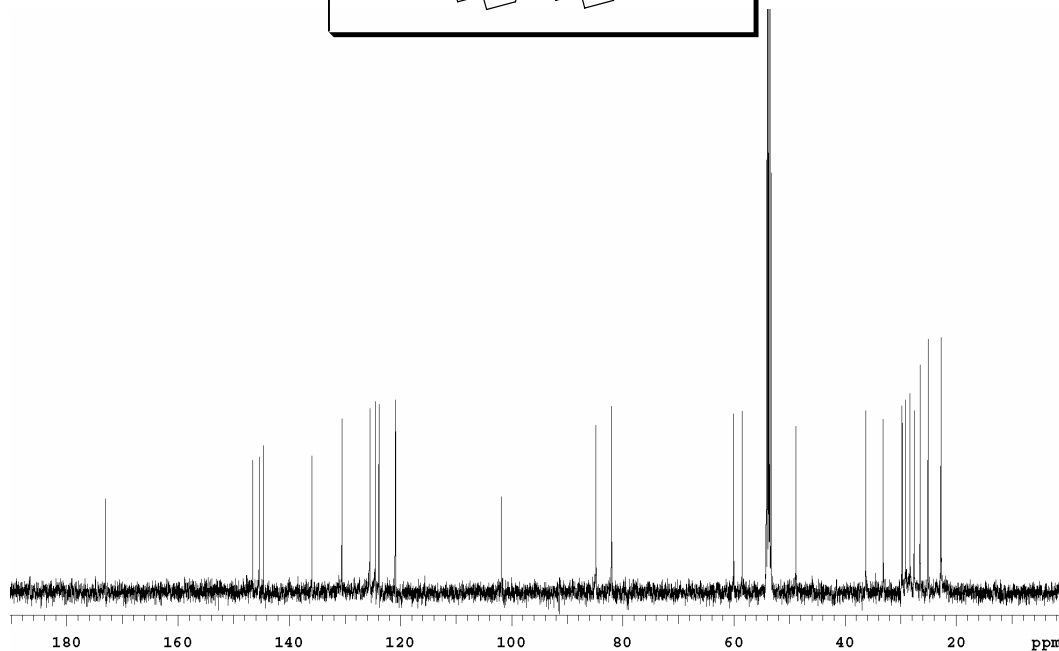

**$^1\text{H}$  and  $^{13}\text{C}$  NMR of the Complex 6 (BisIr) in  $\text{CD}_2\text{Cl}_2$**

**X-ray Structure of 2 (Iodide salt)**

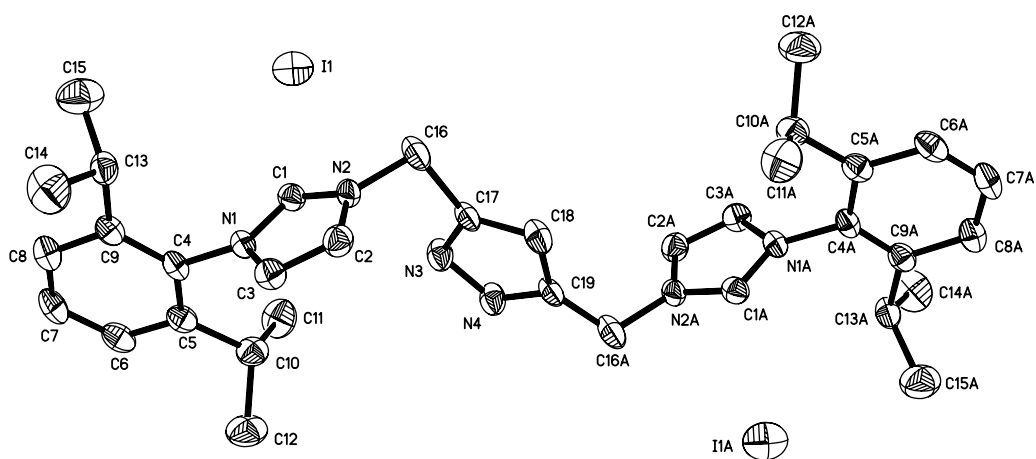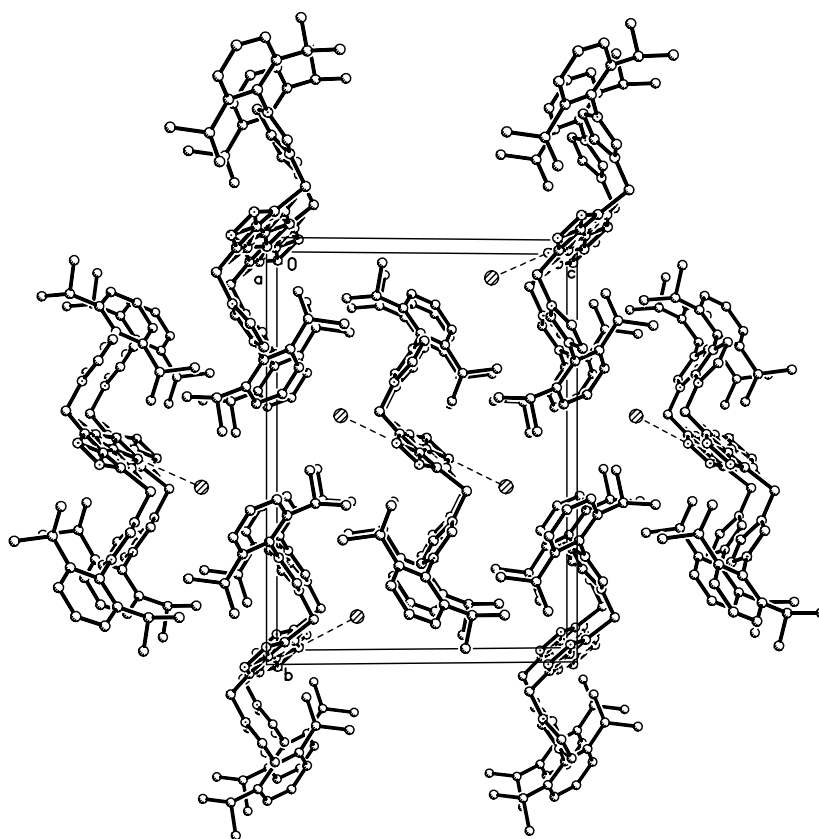

Electronic Supplementary Information for Dalton Transactions  
This journal is © The Royal Society of Chemistry 2007

#### Data collection

A crystal (approximate dimensions 0.40 x 0.20 x 0.15 mm<sup>3</sup>) was placed onto the tip of a 0.1 mm diameter glass capillary and mounted on a Bruker SMART Platform CCD diffractometer for a data collection at 173(2) K.<sup>1</sup> A preliminary set of cell constants was calculated from reflections harvested from three sets of 20 frames. These initial sets of frames were oriented such that orthogonal wedges of reciprocal space were surveyed. This produced initial orientation matrices determined from 114 reflections. The data collection was carried out using MoK $\alpha$  radiation (graphite monochromator) with a frame time of 30 seconds and a detector distance of 4.900 cm. A randomly oriented region of reciprocal space was surveyed to the extent of one sphere and to a resolution of 0.84 Å. Four major sections of frames were collected with 0.30° steps in  $\omega$  at four different  $\phi$  settings and a detector position of -28° in  $2\theta$ . The intensity data were corrected for absorption and decay (SADABS).<sup>2</sup> Final cell constants were calculated from the xyz centroids of 4052 strong reflections from the actual data collection after integration (SAINT).<sup>3</sup> Please refer to Table 1 for additional crystal and refinement information.

#### Structure solution and refinement

The structure was solved using SHELXS-97<sup>4</sup> and refined using SHELXL-97.<sup>4</sup> The space group  $P2_1/n$  was determined based on systematic absences and intensity statistics. A direct-methods solution was calculated which provided most non-hydrogen atoms from the E-map. Full-matrix least squares / difference Fourier cycles were performed which located the remaining non-hydrogen atoms. All non-hydrogen atoms were refined with anisotropic displacement parameters. All hydrogen atoms were placed in ideal positions and refined as riding atoms with relative isotropic displacement parameters. The final full matrix least squares refinement converged to  $R1 = 0.0457$  and  $wR2 = 0.1231$  ( $F^2$ , all data).

---

<sup>1</sup> SMART V5.054, Bruker Analytical X-ray Systems, Madison, WI (2001).

<sup>2</sup> An empirical correction for absorption anisotropy, R. Blessing, *Acta Cryst.* **A51**, 33-38 (1995).

<sup>3</sup> SAINT+ V6.45, Bruker Analytical X-Ray Systems, Madison, WI (2003).



Electronic Supplementary Information for Dalton Transactions  
This journal is © The Royal Society of Chemistry 2007

<sup>4</sup> SHELXTL V6.14, Bruker Analytical X-Ray Systems, Madison, WI (2000).

## Tables for 2 (Iodide salt)

Table 1. Crystal data and structure refinement.

|                                                     |                                                               |                           |
|-----------------------------------------------------|---------------------------------------------------------------|---------------------------|
| Identification code                                 | 07065                                                         |                           |
| Empirical formula                                   | C <sub>35</sub> H <sub>46</sub> I <sub>2</sub> N <sub>6</sub> |                           |
| Formula weight                                      | 804.58                                                        |                           |
| Temperature                                         | 173(2) K                                                      |                           |
| Wavelength                                          | 0.71073 Å                                                     |                           |
| Crystal system                                      | Monoclinic                                                    |                           |
| Space group                                         | <i>P</i> <sub>2</sub> /n                                      |                           |
| Unit cell dimensions                                | <i>a</i> = 7.7975(7) Å                                        | $\alpha = 90^\circ$       |
|                                                     | <i>b</i> = 17.8932(17) Å                                      | $\beta = 96.196(2)^\circ$ |
|                                                     | <i>c</i> = 13.1964(13) Å                                      | $\gamma = 90^\circ$       |
| Volume                                              | 1830.4(3) Å <sup>3</sup>                                      |                           |
| <i>Z</i>                                            | 2                                                             |                           |
| Density (calculated)                                | 1.460 Mg/m <sup>3</sup>                                       |                           |
| Absorption coefficient                              | 1.749 mm <sup>-1</sup>                                        |                           |
| <i>F</i> (000)                                      | 808                                                           |                           |
| Crystal color, morphology                           | colorless, rod                                                |                           |
| Crystal size                                        | 0.40 x 0.20 x 0.15 mm <sup>3</sup>                            |                           |
| Theta range for data collection                     | 1.92 to 25.05°                                                |                           |
| Index ranges                                        | $-9 \leq h \leq 9, -21 \leq k \leq 21, -15 \leq l \leq 15$    |                           |
| Reflections collected                               | 14689                                                         |                           |
| Independent reflections                             | 3247 [ <i>R</i> (int) = 0.0259]                               |                           |
| Observed reflections                                | 2974                                                          |                           |
| Completeness to theta = 25.05°                      | 99.9%                                                         |                           |
| Absorption correction                               | Multi-scan                                                    |                           |
| Max. and min. transmission                          | 0.7793 and 0.5413                                             |                           |
| Refinement method                                   | Full-matrix least-squares on <i>F</i> <sup>2</sup>            |                           |
| Data / restraints / parameters                      | 3247 / 15 / 209                                               |                           |
| Goodness-of-fit on <i>F</i> <sup>2</sup>            | 1.011                                                         |                           |
| Final <i>R</i> indices [ <i>I</i> > 2σ( <i>I</i> )] | <i>R</i> 1 = 0.0457, <i>wR</i> 2 = 0.1201                     |                           |
| <i>R</i> indices (all data)                         | <i>R</i> 1 = 0.0497, <i>wR</i> 2 = 0.1231                     |                           |
| Largest diff. peak and hole                         | 2.020 and -0.842 e.Å <sup>-3</sup>                            |                           |

Table 2. Atomic coordinates ( $\times 10^4$ ) and equivalent isotropic displacement parameters ( $\text{\AA}^2 \times 10^3$ ).  $U_{\text{eq}}$  is defined as one third of the trace of the orthogonalized  $U_{ij}$  tensor.

|     | x        | y       | z       | $U_{\text{eq}}$ |
|-----|----------|---------|---------|-----------------|
| I1  | 6393(1)  | 5868(1) | 7757(1) | 50(1)           |
| N1  | 3165(4)  | 7467(2) | 5329(3) | 25(1)           |
| N2  | 1552(5)  | 6642(2) | 5934(3) | 27(1)           |
| C1  | 3171(6)  | 6861(2) | 5915(3) | 28(1)           |
| C2  | 481(6)   | 7109(3) | 5338(3) | 33(1)           |
| C3  | 1483(6)  | 7626(2) | 4955(3) | 31(1)           |
| C4  | 4689(5)  | 7869(2) | 5079(3) | 26(1)           |
| C5  | 5499(5)  | 7601(2) | 4261(3) | 30(1)           |
| C6  | 6938(6)  | 8010(3) | 4026(4) | 35(1)           |
| C7  | 7488(6)  | 8638(3) | 4582(4) | 37(1)           |
| C8  | 6653(6)  | 8876(3) | 5385(4) | 36(1)           |
| C9  | 5202(6)  | 8493(2) | 5659(3) | 30(1)           |
| C10 | 4889(6)  | 6904(3) | 3673(3) | 35(1)           |
| C11 | 6005(8)  | 6230(3) | 4024(5) | 52(1)           |
| C12 | 4831(8)  | 7016(4) | 2521(4) | 53(1)           |
| C13 | 4268(6)  | 8762(3) | 6540(4) | 34(1)           |
| C14 | 3528(9)  | 9542(3) | 6339(5) | 60(2)           |
| C15 | 5418(8)  | 8729(4) | 7539(4) | 60(2)           |
| C16 | 1058(7)  | 5938(2) | 6404(4) | 39(1)           |
| C17 | 731(11)  | 5387(7) | 5445(7) | 29(2)           |
| C18 | -713(10) | 4957(5) | 5102(7) | 35(2)           |
| C19 | -230(11) | 4596(7) | 4254(7) | 29(2)           |
| N3  | 2035(9)  | 5312(4) | 4882(5) | 34(1)           |
| N4  | 1404(8)  | 4815(4) | 4161(5) | 34(1)           |

Table 3. Bond lengths [Å] and angles [°].

|              |          |                 |           |
|--------------|----------|-----------------|-----------|
| N(1)-C(1)    | 1.332(5) | C(13)-C(15)     | 1.514(7)  |
| N(1)-C(3)    | 1.380(6) | C(13)-C(14)     | 1.524(7)  |
| N(1)-C(4)    | 1.457(5) | C(13)-H(13)     | 1.0000    |
| N(2)-C(1)    | 1.324(6) | C(14)-H(14A)    | 0.9800    |
| N(2)-C(2)    | 1.368(6) | C(14)-H(14B)    | 0.9800    |
| N(2)-C(16)   | 1.473(5) | C(14)-H(14C)    | 0.9800    |
| C(1)-H(1)    | 0.9500   | C(15)-H(15A)    | 0.9800    |
| C(2)-C(3)    | 1.344(6) | C(15)-H(15B)    | 0.9800    |
| C(2)-H(2)    | 0.9500   | C(15)-H(15C)    | 0.9800    |
| C(3)-H(3)    | 0.9500   | C(16)-C(19)#1   | 1.401(10) |
| C(4)-C(9)    | 1.387(6) | C(16)-C(17)     | 1.603(10) |
| C(4)-C(5)    | 1.393(6) | C(16)-H(16A)    | 0.9600    |
| C(5)-C(6)    | 1.402(6) | C(16)-H(16B)    | 0.9600    |
| C(5)-C(10)   | 1.518(6) | C(17)-N(3)      | 1.330(5)  |
| C(6)-C(7)    | 1.383(7) | C(17)-C(18)     | 1.397(5)  |
| C(6)-H(6)    | 0.9500   | C(18)-C(19)     | 1.380(5)  |
| C(7)-C(8)    | 1.370(7) | C(18)-H(18A)    | 0.9600    |
| C(7)-H(7)    | 0.9500   | C(19)-N(4)      | 1.351(5)  |
| C(8)-C(9)    | 1.404(6) | C(19)-C(16)#1   | 1.401(10) |
| C(8)-H(8)    | 0.9500   | N(3)-N(4)       | 1.355(5)  |
| C(9)-C(13)   | 1.515(6) | N(4)-H(4A)      | 0.9001    |
| C(10)-C(12)  | 1.529(7) |                 |           |
| C(10)-C(11)  | 1.530(7) | C(1)-N(1)-C(3)  | 108.5(4)  |
| C(10)-H(10)  | 1.0000   | C(1)-N(1)-C(4)  | 125.6(4)  |
| C(11)-H(11A) | 0.9800   | C(3)-N(1)-C(4)  | 125.8(3)  |
| C(11)-H(11B) | 0.9800   | C(1)-N(2)-C(2)  | 109.4(4)  |
| C(11)-H(11C) | 0.9800   | C(1)-N(2)-C(16) | 123.6(4)  |
| C(12)-H(12A) | 0.9800   | C(2)-N(2)-C(16) | 126.3(4)  |
| C(12)-H(12B) | 0.9800   | N(2)-C(1)-N(1)  | 108.0(4)  |
| C(12)-H(12C) | 0.9800   | N(2)-C(1)-H(1)  | 126.0     |

|                    |          |                      |          |
|--------------------|----------|----------------------|----------|
| N(1)-C(1)-H(1)     | 126.0    | H(11A)-C(11)-H(11B)  | 109.5    |
| C(3)-C(2)-N(2)     | 107.0(4) | C(10)-C(11)-H(11C)   | 109.5    |
| C(3)-C(2)-H(2)     | 126.5    | H(11A)-C(11)-H(11C)  | 109.5    |
| N(2)-C(2)-H(2)     | 126.5    | H(11B)-C(11)-H(11C)  | 109.5    |
| C(2)-C(3)-N(1)     | 107.1(4) | C(10)-C(12)-H(12A)   | 109.5    |
| C(2)-C(3)-H(3)     | 126.5    | C(10)-C(12)-H(12B)   | 109.5    |
| N(1)-C(3)-H(3)     | 126.5    | H(12A)-C(12)-H(12B)  | 109.5    |
| C(9)-C(4)-C(5)     | 125.2(4) | C(10)-C(12)-H(12C)   | 109.5    |
| C(9)-C(4)-N(1)     | 117.7(4) | H(12A)-C(12)-H(12C)  | 109.5    |
| C(5)-C(4)-N(1)     | 117.0(4) | H(12B)-C(12)-H(12C)  | 109.5    |
| C(4)-C(5)-C(6)     | 115.6(4) | C(15)-C(13)-C(9)     | 111.6(4) |
| C(4)-C(5)-C(10)    | 122.4(4) | C(15)-C(13)-C(14)    | 111.4(5) |
| C(6)-C(5)-C(10)    | 122.0(4) | C(9)-C(13)-C(14)     | 111.3(4) |
| C(7)-C(6)-C(5)     | 121.1(4) | C(15)-C(13)-H(13)    | 107.5    |
| C(7)-C(6)-H(6)     | 119.4    | C(9)-C(13)-H(13)     | 107.5    |
| C(5)-C(6)-H(6)     | 119.4    | C(14)-C(13)-H(13)    | 107.5    |
| C(8)-C(7)-C(6)     | 121.1(4) | C(13)-C(14)-H(14A)   | 109.5    |
| C(8)-C(7)-H(7)     | 119.4    | C(13)-C(14)-H(14B)   | 109.5    |
| C(6)-C(7)-H(7)     | 119.4    | H(14A)-C(14)-H(14B)  | 109.5    |
| C(7)-C(8)-C(9)     | 120.7(5) | C(13)-C(14)-H(14C)   | 109.5    |
| C(7)-C(8)-H(8)     | 119.7    | H(14A)-C(14)-H(14C)  | 109.5    |
| C(9)-C(8)-H(8)     | 119.7    | H(14B)-C(14)-H(14C)  | 109.5    |
| C(4)-C(9)-C(8)     | 116.3(4) | C(13)-C(15)-H(15A)   | 109.5    |
| C(4)-C(9)-C(13)    | 123.0(4) | C(13)-C(15)-H(15B)   | 109.5    |
| C(8)-C(9)-C(13)    | 120.6(4) | H(15A)-C(15)-H(15B)  | 109.5    |
| C(5)-C(10)-C(12)   | 112.0(4) | C(13)-C(15)-H(15C)   | 109.5    |
| C(5)-C(10)-C(11)   | 110.8(4) | H(15A)-C(15)-H(15C)  | 109.5    |
| C(12)-C(10)-C(11)  | 111.1(4) | H(15B)-C(15)-H(15C)  | 109.5    |
| C(5)-C(10)-H(10)   | 107.6    | C(19)#1-C(16)-N(2)   | 116.5(6) |
| C(12)-C(10)-H(10)  | 107.6    | C(19)#1-C(16)-C(17)  | 21.2(3)  |
| C(11)-C(10)-H(10)  | 107.6    | N(2)-C(16)-C(17)     | 102.8(5) |
| C(10)-C(11)-H(11A) | 109.5    | C(19)#1-C(16)-H(16A) | 98.1     |
| C(10)-C(11)-H(11B) | 109.5    | N(2)-C(16)-H(16A)    | 109.7    |

Electronic Supplementary Information for Dalton Transactions  
This journal is © The Royal Society of Chemistry 2007

|                      |          |                     |          |
|----------------------|----------|---------------------|----------|
| C(17)-C(16)-H(16A)   | 118.9    | C(17)-C(18)-H(18A)  | 128.9    |
| C(19)#1-C(16)-H(16B) | 113.0    | N(4)-C(19)-C(18)    | 106.3(7) |
| N(2)-C(16)-H(16B)    | 110.3    | N(4)-C(19)-C(16)#1  | 121.2(6) |
| C(17)-C(16)-H(16B)   | 106.6    | C(18)-C(19)-C(16)#1 | 132.4(6) |
| H(16A)-C(16)-H(16B)  | 108.3    | C(17)-N(3)-N(4)     | 102.5(7) |
| N(3)-C(17)-C(18)     | 113.7(7) | C(19)-N(4)-N(3)     | 113.7(7) |
| N(3)-C(17)-C(16)     | 115.9(6) | C(19)-N(4)-H(4A)    | 119.5    |
| C(18)-C(17)-C(16)    | 130.4(6) | N(3)-N(4)-H(4A)     | 126.8    |
| C(19)-C(18)-C(17)    | 103.9(7) |                     |          |
| C(19)-C(18)-H(18A)   | 127.1    |                     |          |

---

Symmetry transformations used to generate equivalent atoms:

#1 -x,-y+1,-z+1

Table 4. Anisotropic displacement parameters ( $\text{\AA}^2 \times 10^3$ ). The anisotropic displacement factor exponent takes the form:  $-2\pi^2 [ h^2 a^{*2} U_{11} + \dots + 2 h k a^* b^* U_{12} ]$

|     | $U_{11}$ | $U_{22}$ | $U_{33}$ | $U_{23}$ | $U_{13}$ | $U_{12}$ |
|-----|----------|----------|----------|----------|----------|----------|
| I1  | 45(1)    | 57(1)    | 46(1)    | 0(1)     | 5(1)     | 15(1)    |
| N1  | 27(2)    | 22(2)    | 28(2)    | 2(1)     | 7(1)     | -2(1)    |
| N2  | 36(2)    | 19(2)    | 27(2)    | -1(1)    | 6(2)     | -6(1)    |
| C1  | 32(2)    | 24(2)    | 27(2)    | 0(2)     | 6(2)     | 1(2)     |
| C2  | 28(2)    | 36(2)    | 34(2)    | -2(2)    | 2(2)     | -3(2)    |
| C3  | 29(2)    | 30(2)    | 33(2)    | 3(2)     | 2(2)     | 4(2)     |
| C4  | 22(2)    | 25(2)    | 33(2)    | 9(2)     | 5(2)     | -1(2)    |
| C5  | 27(2)    | 33(2)    | 30(2)    | 6(2)     | 5(2)     | 5(2)     |
| C6  | 31(2)    | 42(3)    | 35(2)    | 10(2)    | 13(2)    | 5(2)     |
| C7  | 28(2)    | 35(2)    | 50(3)    | 15(2)    | 10(2)    | -2(2)    |
| C8  | 33(2)    | 30(2)    | 44(3)    | 5(2)     | 7(2)     | -4(2)    |
| C9  | 28(2)    | 28(2)    | 33(2)    | 7(2)     | 5(2)     | 2(2)     |
| C10 | 34(2)    | 42(3)    | 31(2)    | -4(2)    | 10(2)    | 0(2)     |
| C11 | 58(3)    | 37(3)    | 61(3)    | -9(3)    | 7(3)     | 6(2)     |
| C12 | 53(3)    | 76(4)    | 34(3)    | -6(3)    | 15(2)    | -2(3)    |
| C13 | 35(2)    | 29(2)    | 38(2)    | -4(2)    | 13(2)    | -7(2)    |
| C14 | 69(4)    | 40(3)    | 74(4)    | -5(3)    | 23(3)    | 15(3)    |
| C15 | 53(3)    | 85(5)    | 42(3)    | -4(3)    | 9(3)     | 0(3)     |
| C16 | 47(3)    | 29(2)    | 43(3)    | 5(2)     | 18(2)    | -7(2)    |
| C17 | 37(5)    | 21(3)    | 31(6)    | 4(4)     | 14(3)    | -4(4)    |
| C18 | 40(4)    | 25(5)    | 44(5)    | 2(4)     | 15(4)    | -3(4)    |
| C19 | 37(5)    | 21(3)    | 31(6)    | 4(4)     | 14(3)    | -4(4)    |
| N3  | 38(3)    | 27(3)    | 39(3)    | -8(2)    | 16(2)    | -6(2)    |
| N4  | 38(3)    | 27(3)    | 39(3)    | -8(2)    | 16(2)    | -6(2)    |

Table 5. Torsion angles [°].

|              |           |                   |            |
|--------------|-----------|-------------------|------------|
| C2-N2-C1-N1  | 0.9(5)    | C4-C5-C10-C12     | 135.4(5)   |
| C16-N2-C1-N1 | 172.4(4)  | C6-C5-C10-C12     | -45.7(6)   |
| C3-N1-C1-N2  | -1.0(5)   | C4-C5-C10-C11     | -100.0(5)  |
| C4-N1-C1-N2  | -177.8(4) | C6-C5-C10-C11     | 78.9(5)    |
| C1-N2-C2-C3  | -0.5(5)   | C4-C9-C13-C15     | 117.3(5)   |
| C16-N2-C2-C3 | -171.7(4) | C8-C9-C13-C15     | -63.1(6)   |
| N2-C2-C3-N1  | -0.2(5)   | C4-C9-C13-C14     | -117.6(5)  |
| C1-N1-C3-C2  | 0.7(5)    | C8-C9-C13-C14     | 61.9(6)    |
| C4-N1-C3-C2  | 177.5(4)  | C1-N2-C16-C19#1   | -115.3(6)  |
| C1-N1-C4-C9  | -96.5(5)  | C2-N2-C16-C19#1   | 54.7(7)    |
| C3-N1-C4-C9  | 87.2(5)   | C1-N2-C16-C17     | -98.1(6)   |
| C1-N1-C4-C5  | 84.6(5)   | C2-N2-C16-C17     | 71.9(6)    |
| C3-N1-C4-C5  | -91.7(5)  | C19#1-C16-C17-N3  | -171(3)    |
| C9-C4-C5-C6  | -0.3(6)   | N2-C16-C17-N3     | 55.6(11)   |
| N1-C4-C5-C6  | 178.6(4)  | C19#1-C16-C17-C18 | 7.8(17)    |
| C9-C4-C5-C10 | 178.7(4)  | N2-C16-C17-C18    | -125.3(12) |
| N1-C4-C5-C10 | -2.5(6)   | N3-C17-C18-C19    | -0.3(17)   |
| C4-C5-C6-C7  | -0.1(6)   | C16-C17-C18-C19   | -179.5(8)  |
| C10-C5-C6-C7 | -179.0(4) | C17-C18-C19-N4    | 0.9(16)    |
| C5-C6-C7-C8  | 0.5(7)    | C17-C18-C19-C16#1 | 176.5(9)   |
| C6-C7-C8-C9  | -0.6(7)   | C18-C17-N3-N4     | -0.4(13)   |
| C5-C4-C9-C8  | 0.1(6)    | C16-C17-N3-N4     | 179.0(8)   |
| N1-C4-C9-C8  | -178.7(4) | C18-C19-N4-N3     | -1.2(13)   |
| C5-C4-C9-C13 | 179.7(4)  | C16#1-C19-N4-N3   | -177.4(9)  |
| N1-C4-C9-C13 | 0.9(6)    | C17-N3-N4-C19     | 1.0(10)    |
| C7-C8-C9-C4  | 0.3(7)    |                   |            |
| C7-C8-C9-C13 | -179.3(4) |                   |            |

Symmetry transformations used to generate  
equivalent atoms:

#1 -x,-y+1,-z+1



Table 6. Hydrogen bonds [ $\text{\AA}$  and  $^\circ$ ].

| D-H...A       | d(D-H) | d(H...A) | d(D...A) | $\angle(\text{DHA})$ |
|---------------|--------|----------|----------|----------------------|
| C1-H1...I1    | 0.95   | 2.84     | 3.750(4) | 161.9                |
| N4-H4A...I1#2 | 0.90   | 2.53     | 3.434(6) | 178.0                |

Symmetry transformations used to generate equivalent atoms:

#1  $-x, -y+1, -z+1$  #2  $-x+1, -y+1, -z+1$

**X-ray Structure of 4 (Dimeric Ni complex)**

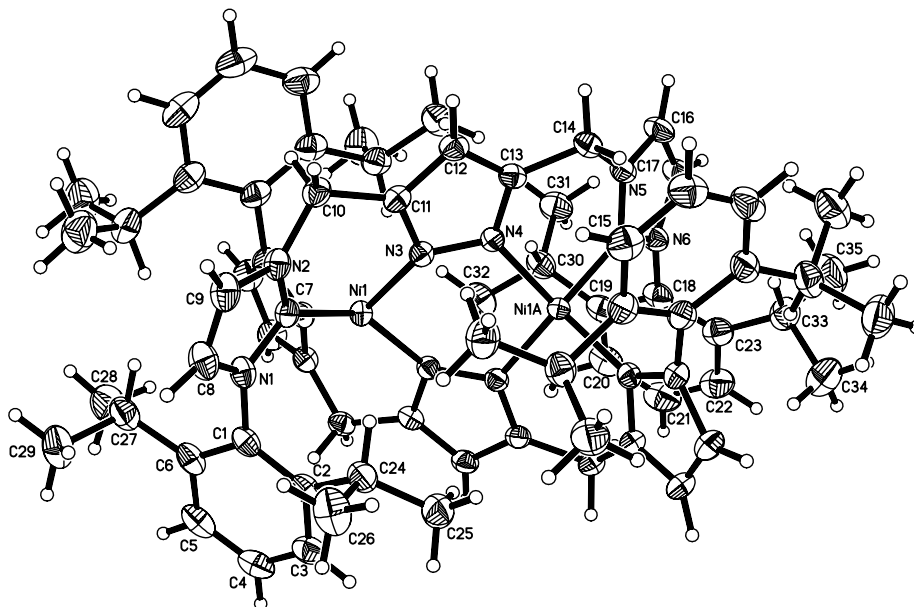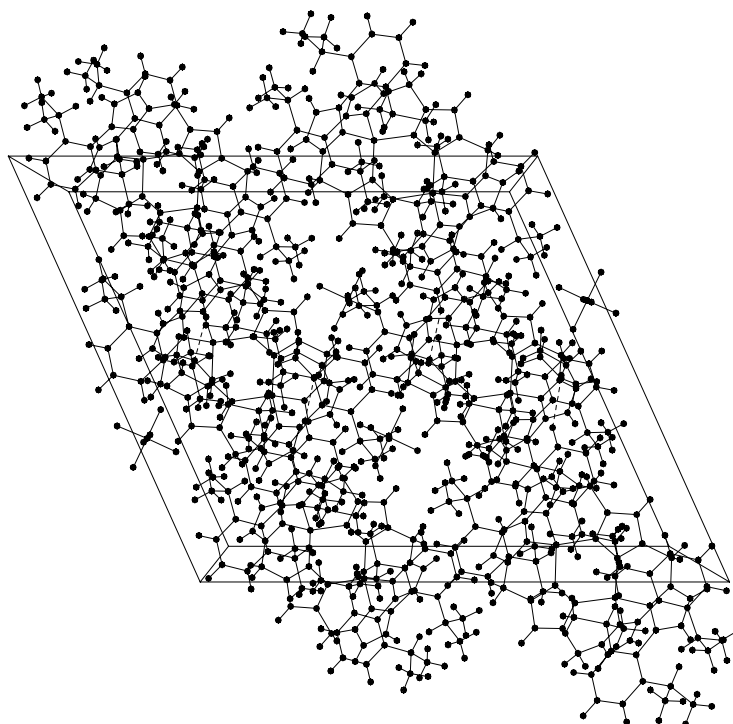

Electronic Supplementary Information for Dalton Transactions  
This journal is © The Royal Society of Chemistry 2007

#### Data collection

A crystal (approximate dimensions 0.45 x 0.30 x 0.08 mm<sup>3</sup>) was placed onto the tip of a 0.1 mm diameter glass capillary and mounted on a CCD area detector diffractometer for a data collection at 173(2) K.<sup>1</sup> A preliminary set of cell constants was calculated from reflections harvested from three sets of 20 frames. These initial sets of frames were oriented such that orthogonal wedges of reciprocal space were surveyed. This produced initial orientation matrices determined from 182 reflections. The data collection was carried out using MoK $\alpha$  radiation (graphite monochromator) with a frame time of 30 seconds and a detector distance of 4.9 cm. A randomly oriented region of reciprocal space was surveyed to the extent of one sphere and to a resolution of 0.77 Å. Four major sections of frames were collected with 0.30° steps in  $\omega$  at four different  $\phi$  settings and a detector position of -28° in  $2\theta$ . The intensity data were corrected for absorption and decay (SADABS).<sup>2</sup> Final cell constants were calculated from 2961 strong reflections from the actual data collection after integration (SAINT).<sup>3</sup> Please refer to Table 1 for additional crystal and refinement information.

#### Structure solution and refinement

The structure was solved using Bruker SHELXTL<sup>4</sup> and refined using Bruker SHELXTL.<sup>4</sup> The space group C2/c was determined based on systematic absences and intensity statistics. A direct-methods solution was calculated which provided most non-hydrogen atoms from the E-map. Full-matrix least squares / difference Fourier cycles were performed which located the remaining non-hydrogen atoms. All non-hydrogen atoms were refined with anisotropic displacement parameters. All hydrogen atoms were placed in ideal positions and refined as riding atoms with relative isotropic displacement parameters. The final full matrix least squares refinement converged to  $R1 = 0.0481$  and  $wR2 = 0.1379$  ( $F^2$ , all data).

---

<sup>1</sup> SMART V5.054, Bruker Analytical X-ray Systems, Madison, WI (2001).

<sup>2</sup> An empirical correction for absorption anisotropy, R. Blessing, *Acta Cryst.* **A51**, 33-38 (1995).

<sup>3</sup> SAINT+ V6.45, Bruker Analytical X-Ray Systems, Madison, WI (2003).

<sup>4</sup> SHELXTL V6.14, Bruker Analytical X-Ray Systems, Madison, WI (2000).

<sup>5</sup> A. Altomare, M. C. Burla, M. Camalli, G. Cascarano, C. Giacovazzo, A. Guagliardi, A. G. G. Moliterni, G. Polidori, R. Spagna. Sir97: a new tool for crystal structure determination and refinement. *J. Appl. Cryst.* **32**, 115-119 (1998).

<sup>6</sup> M. C. Burla, M. Camalli, B. Carrozzini, G. L. Cascarano, C. Giacovazzo, G. Polidori, R. Spagna. Sir2002: a new Direct Methods program for automatic solution and refinement of crystal structures. *J. Appl. Cryst.* (2003), in preparation.

<sup>7</sup> A. L. Spek, *Acta Cryst.* **A46**, C34 (1990). PLATON, A Multipurpose Crystallographic Tool, Utrecht

Electronic Supplementary Information for Dalton Transactions  
This journal is © The Royal Society of Chemistry 2007

University, Utrecht, The Netherlands, A. L. Spek (2000).

**Tables for 4 (dimeric Ni complex)**

Table 1. Crystal data and structure refinement.

|                                        |                                                                                                                |                            |
|----------------------------------------|----------------------------------------------------------------------------------------------------------------|----------------------------|
| Identification code                    | 07006a                                                                                                         |                            |
| Empirical formula                      | C <sub>78</sub> H <sub>102</sub> F <sub>12</sub> N <sub>12</sub> Ni <sub>2</sub> O <sub>2</sub> P <sub>2</sub> |                            |
| Formula weight                         | 1647.08                                                                                                        |                            |
| Temperature                            | 173(2) K                                                                                                       |                            |
| Wavelength                             | 0.71073 Å                                                                                                      |                            |
| Crystal system                         | Monoclinic                                                                                                     |                            |
| Space group                            | C2/c                                                                                                           |                            |
| Unit cell dimensions                   | $a = 20.8499(18)$ Å                                                                                            | $\alpha = 90^\circ$        |
|                                        | $b = 17.6914(15)$ Å                                                                                            | $\beta = 114.251(1)^\circ$ |
|                                        | $c = 23.633(2)$ Å                                                                                              | $\gamma = 90^\circ$        |
| Volume                                 | 7948.0(12) Å <sup>3</sup>                                                                                      |                            |
| Z                                      | 4                                                                                                              |                            |
| Density (calculated)                   | 1.376 Mg/m <sup>3</sup>                                                                                        |                            |
| Absorption coefficient                 | 0.596 mm <sup>-1</sup>                                                                                         |                            |
| $F(000)$                               | 3456                                                                                                           |                            |
| Crystal color, morphology              | Red, Block                                                                                                     |                            |
| Crystal size                           | 0.45 x 0.30 x 0.08 mm <sup>3</sup>                                                                             |                            |
| Theta range for data collection        | 1.57 to 27.50°                                                                                                 |                            |
| Index ranges                           | $-27 \leq h \leq 24, 0 \leq k \leq 22, 0 \leq l \leq 30$                                                       |                            |
| Reflections collected                  | 37711                                                                                                          |                            |
| Independent reflections                | 9020 [ $R(\text{int}) = 0.0334$ ]                                                                              |                            |
| Observed reflections                   | 7198                                                                                                           |                            |
| Completeness to theta = 27.50°         | 98.8%                                                                                                          |                            |
| Absorption correction                  | Multi-scan                                                                                                     |                            |
| Max. and min. transmission             | 0.9539 and 0.7753                                                                                              |                            |
| Refinement method                      | Full-matrix least-squares on $F^2$                                                                             |                            |
| Data / restraints / parameters         | 9020 / 4 / 495                                                                                                 |                            |
| Goodness-of-fit on $F^2$               | 1.089                                                                                                          |                            |
| Final $R$ indices [ $I > 2\sigma(I)$ ] | $R1 = 0.0481, wR2 = 0.1299$                                                                                    |                            |
| $R$ indices (all data)                 | $R1 = 0.0617, wR2 = 0.1379$                                                                                    |                            |
| Largest diff. peak and hole            | 1.259 and -0.878 e.Å <sup>-3</sup>                                                                             |                            |

Table 2. Atomic coordinates ( $\times 10^4$ ) and equivalent isotropic displacement parameters ( $\text{\AA}^2 \times 10^3$ ).  $U_{\text{eq}}$  is defined as one third of the trace of the orthogonalized  $U_{ij}$  tensor.

|     | x       | y       | z       | $U_{\text{eq}}$ |
|-----|---------|---------|---------|-----------------|
| Ni1 | 5652(1) | 7631(1) | 2152(1) | 20(1)           |
| N1  | 6318(1) | 6502(1) | 1704(1) | 28(1)           |
| N2  | 5297(1) | 6817(1) | 1014(1) | 26(1)           |
| N3  | 4663(1) | 7497(1) | 1760(1) | 21(1)           |
| N4  | 4205(1) | 7744(1) | 2005(1) | 21(1)           |
| N5  | 3081(1) | 8464(1) | 2196(1) | 25(1)           |
| N6  | 3603(1) | 8817(1) | 3149(1) | 27(1)           |
| C1  | 6900(1) | 6401(1) | 2309(1) | 29(1)           |
| C2  | 6764(1) | 6041(1) | 2776(1) | 30(1)           |
| C3  | 7316(1) | 5988(2) | 3365(1) | 36(1)           |
| C4  | 7977(1) | 6254(2) | 3470(1) | 39(1)           |
| C5  | 8111(1) | 6562(2) | 2995(1) | 39(1)           |
| C6  | 7575(1) | 6646(1) | 2401(1) | 33(1)           |
| C7  | 5784(1) | 7013(1) | 1576(1) | 24(1)           |
| C8  | 6149(1) | 5996(2) | 1211(1) | 36(1)           |
| C9  | 5516(1) | 6192(2) | 785(1)  | 34(1)           |
| C10 | 4630(1) | 7220(1) | 706(1)  | 28(1)           |
| C11 | 4297(1) | 7422(1) | 1142(1) | 24(1)           |
| C12 | 3598(1) | 7612(1) | 979(1)  | 26(1)           |
| C13 | 3563(1) | 7809(1) | 1533(1) | 23(1)           |
| C14 | 2918(1) | 8027(1) | 1625(1) | 26(1)           |
| C15 | 3608(1) | 8277(1) | 2738(1) | 24(1)           |
| C16 | 2739(1) | 9108(2) | 2254(1) | 33(1)           |
| C17 | 3065(1) | 9331(2) | 2847(1) | 36(1)           |
| C18 | 4137(1) | 8905(1) | 3782(1) | 30(1)           |
| C19 | 4785(1) | 9230(1) | 3868(1) | 32(1)           |
| C20 | 5291(2) | 9290(2) | 4478(1) | 41(1)           |
| C21 | 5148(2) | 9059(2) | 4973(1) | 47(1)           |
| C22 | 4503(2) | 8774(2) | 4877(1) | 44(1)           |
| C23 | 3976(2) | 8689(2) | 4279(1) | 35(1)           |

Electronic Supplementary Information for Dalton Transactions  
This journal is © The Royal Society of Chemistry 2007

|     |         |          |         |        |
|-----|---------|----------|---------|--------|
| C24 | 6067(1) | 5658(2)  | 2652(1) | 33(1)  |
| C25 | 5901(2) | 5613(2)  | 3221(1) | 42(1)  |
| C26 | 6074(2) | 4859(2)  | 2404(2) | 51(1)  |
| C27 | 7742(1) | 6958(2)  | 1882(1) | 39(1)  |
| C28 | 8209(2) | 7663(2)  | 2078(2) | 52(1)  |
| C29 | 8087(2) | 6343(2)  | 1638(2) | 54(1)  |
| C30 | 4929(1) | 9567(2)  | 3340(1) | 34(1)  |
| C31 | 4614(2) | 10368(2) | 3202(2) | 47(1)  |
| C32 | 5709(2) | 9602(2)  | 3474(2) | 43(1)  |
| C33 | 3252(2) | 8411(2)  | 4194(1) | 41(1)  |
| C34 | 3284(2) | 7724(2)  | 4597(2) | 57(1)  |
| C35 | 2845(2) | 9059(2)  | 4333(2) | 63(1)  |
| P1  | 6781(1) | 4538(1)  | 221(1)  | 40(1)  |
| F1  | 6458(2) | 4465(2)  | 714(2)  | 139(2) |
| F2  | 7522(2) | 4589(2)  | 778(1)  | 138(2) |
| F3  | 6846(1) | 3637(1)  | 240(1)  | 61(1)  |
| F4  | 6715(1) | 5432(1)  | 212(1)  | 75(1)  |
| F5  | 6039(1) | 4462(1)  | -335(1) | 90(1)  |
| F6  | 7125(2) | 4593(2)  | -249(1) | 91(1)  |
| O1  | 4769(2) | 7653(2)  | 8720(2) | 92(1)  |
| C37 | 5297(2) | 7439(3)  | 8510(2) | 85(1)  |
| C38 | 5460(3) | 6651(3)  | 8620(3) | 115(2) |
| C39 | 5101(4) | 6398(3)  | 9032(3) | 112(2) |
| C40 | 4627(3) | 6998(3)  | 9011(3) | 106(2) |

---



Table 3. Bond lengths [ $\text{\AA}$ ] and angles [ $^\circ$ ].

|               |            |               |          |
|---------------|------------|---------------|----------|
| Ni(1)-C(15)#1 | 1.851(2)   | C(6)-C(27)    | 1.510(4) |
| Ni(1)-C(7)    | 1.851(2)   | C(8)-C(9)     | 1.335(4) |
| Ni(1)-N(3)    | 1.8966(19) | C(8)-H(8A)    | 0.9500   |
| Ni(1)-N(4)#1  | 1.9000(19) | C(9)-H(9A)    | 0.9500   |
| N(1)-C(7)     | 1.368(3)   | C(10)-C(11)   | 1.502(3) |
| N(1)-C(8)     | 1.395(3)   | C(10)-H(10A)  | 0.9900   |
| N(1)-C(1)     | 1.458(3)   | C(10)-H(10B)  | 0.9900   |
| N(2)-C(7)     | 1.345(3)   | C(11)-C(12)   | 1.388(3) |
| N(2)-C(9)     | 1.387(3)   | C(12)-C(13)   | 1.383(3) |
| N(2)-C(10)    | 1.463(3)   | C(12)-H(12A)  | 0.9500   |
| N(3)-C(11)    | 1.349(3)   | C(13)-C(14)   | 1.500(3) |
| N(3)-N(4)     | 1.375(3)   | C(14)-H(14A)  | 0.9900   |
| N(4)-C(13)    | 1.350(3)   | C(14)-H(14B)  | 0.9900   |
| N(4)-Ni(1)#1  | 1.9000(19) | C(15)-Ni(1)#1 | 1.851(2) |
| N(5)-C(15)    | 1.342(3)   | C(16)-C(17)   | 1.340(4) |
| N(5)-C(16)    | 1.381(3)   | C(16)-H(16A)  | 0.9500   |
| N(5)-C(14)    | 1.468(3)   | C(17)-H(17A)  | 0.9500   |
| N(6)-C(15)    | 1.365(3)   | C(18)-C(23)   | 1.400(4) |
| N(6)-C(17)    | 1.393(3)   | C(18)-C(19)   | 1.405(4) |
| N(6)-C(18)    | 1.462(3)   | C(19)-C(20)   | 1.398(4) |
| C(1)-C(2)     | 1.401(4)   | C(19)-C(30)   | 1.520(4) |
| C(1)-C(6)     | 1.403(3)   | C(20)-C(21)   | 1.383(4) |
| C(2)-C(3)     | 1.398(4)   | C(20)-H(20A)  | 0.9500   |
| C(2)-C(24)    | 1.516(3)   | C(21)-C(22)   | 1.364(5) |
| C(3)-C(4)     | 1.378(4)   | C(21)-H(21A)  | 0.9500   |
| C(3)-H(3A)    | 0.9500     | C(22)-C(23)   | 1.396(4) |
| C(4)-C(5)     | 1.376(4)   | C(22)-H(22A)  | 0.9500   |
| C(4)-H(4B)    | 0.9500     | C(23)-C(33)   | 1.520(4) |
| C(5)-C(6)     | 1.397(4)   | C(24)-C(25)   | 1.523(4) |
| C(5)-H(5A)    | 0.9500     | C(24)-C(26)   | 1.533(4) |

Electronic Supplementary Information for Dalton Transactions  
 This journal is © The Royal Society of Chemistry 2007

|                      |           |                   |            |
|----------------------|-----------|-------------------|------------|
| C(24)-H(24A)         | 1.0000    | C(33)-H(33A)      | 1.0000     |
| C(25)-H(25A)         | 0.9800    | C(34)-H(34A)      | 0.9800     |
| C(25)-H(25B)         | 0.9800    | C(34)-H(34B)      | 0.9800     |
| C(25)-H(25C)         | 0.9800    | C(34)-H(34C)      | 0.9800     |
| C(26)-H(26A)         | 0.9800    | C(35)-H(35A)      | 0.9800     |
| C(26)-H(26B)         | 0.9800    | C(35)-H(35B)      | 0.9800     |
| C(26)-H(26C)         | 0.9800    | C(35)-H(35C)      | 0.9800     |
| C(27)-C(28)          | 1.533(4)  | P(1)-F(6)         | 1.552(2)   |
| C(27)-C(29)          | 1.541(4)  | P(1)-F(2)         | 1.568(3)   |
| C(27)-H(27A)         | 1.0000    | P(1)-F(5)         | 1.572(2)   |
| C(28)-H(28A)         | 0.9800    | P(1)-F(1)         | 1.574(3)   |
| C(28)-H(28B)         | 0.9800    | P(1)-F(4)         | 1.587(2)   |
| C(28)-H(28C)         | 0.9800    | P(1)-F(3)         | 1.599(2)   |
| C(29)-H(29A)         | 0.9800    | O(1)-C(37)        | 1.432(4)   |
| C(29)-H(29B)         | 0.9800    | O(1)-C(40)        | 1.438(4)   |
| C(29)-H(29C)         | 0.9800    | C(37)-C(38)       | 1.435(5)   |
| C(30)-C(32)          | 1.524(4)  | C(37)-H(37A)      | 0.9900     |
| C(30)-C(31)          | 1.539(4)  | C(37)-H(37B)      | 0.9900     |
| C(30)-H(30A)         | 1.0000    | C(38)-C(39)       | 1.520(8)   |
| C(31)-H(31A)         | 0.9800    | C(38)-H(38A)      | 0.9900     |
| C(31)-H(31B)         | 0.9800    | C(38)-H(38B)      | 0.9900     |
| C(31)-H(31C)         | 0.9800    | C(39)-C(40)       | 1.438(5)   |
| C(32)-H(32A)         | 0.9800    | C(39)-H(39A)      | 0.9900     |
| C(32)-H(32B)         | 0.9800    | C(39)-H(39B)      | 0.9900     |
| C(32)-H(32C)         | 0.9800    | C(40)-H(40A)      | 0.9900     |
| C(33)-C(34)          | 1.527(4)  | C(40)-H(40B)      | 0.9900     |
| C(33)-C(35)          | 1.539(4)  |                   |            |
| <br>                 |           |                   |            |
| C(15)#1-Ni(1)-C(7)   | 95.75(10) | N(3)-Ni(1)-N(4)#1 | 101.30(8)  |
| C(15)#1-Ni(1)-N(3)   | 145.30(9) | C(7)-N(1)-C(8)    | 109.6(2)   |
| C(7)-Ni(1)-N(3)      | 91.65(9)  | C(7)-N(1)-C(1)    | 124.94(19) |
| C(15)#1-Ni(1)-N(4)#1 | 91.38(9)  | C(8)-N(1)-C(1)    | 124.3(2)   |
| C(7)-Ni(1)-N(4)#1    | 145.70(9) | C(7)-N(2)-C(9)    | 110.8(2)   |

Electronic Supplementary Information for Dalton Transactions  
 This journal is © The Royal Society of Chemistry 2007

|                    |            |                     |            |
|--------------------|------------|---------------------|------------|
| C(7)-N(2)-C(10)    | 122.8(2)   | N(2)-C(7)-Ni(1)     | 126.78(17) |
| C(9)-N(2)-C(10)    | 126.4(2)   | N(1)-C(7)-Ni(1)     | 125.49(17) |
| C(11)-N(3)-N(4)    | 107.84(18) | C(9)-C(8)-N(1)      | 107.2(2)   |
| C(11)-N(3)-Ni(1)   | 123.97(16) | C(9)-C(8)-H(8A)     | 126.4      |
| N(4)-N(3)-Ni(1)    | 123.95(14) | N(1)-C(8)-H(8A)     | 126.4      |
| C(13)-N(4)-N(3)    | 107.54(18) | C(8)-C(9)-N(2)      | 107.1(2)   |
| C(13)-N(4)-Ni(1)#1 | 123.52(15) | C(8)-C(9)-H(9A)     | 126.5      |
| N(3)-N(4)-Ni(1)#1  | 124.81(14) | N(2)-C(9)-H(9A)     | 126.5      |
| C(15)-N(5)-C(16)   | 111.2(2)   | N(2)-C(10)-C(11)    | 112.90(19) |
| C(15)-N(5)-C(14)   | 122.53(19) | N(2)-C(10)-H(10A)   | 109.0      |
| C(16)-N(5)-C(14)   | 126.2(2)   | C(11)-C(10)-H(10A)  | 109.0      |
| C(15)-N(6)-C(17)   | 109.5(2)   | N(2)-C(10)-H(10B)   | 109.0      |
| C(15)-N(6)-C(18)   | 125.33(19) | C(11)-C(10)-H(10B)  | 109.0      |
| C(17)-N(6)-C(18)   | 124.7(2)   | H(10A)-C(10)-H(10B) | 107.8      |
| C(2)-C(1)-C(6)     | 122.3(2)   | N(3)-C(11)-C(12)    | 109.7(2)   |
| C(2)-C(1)-N(1)     | 118.2(2)   | N(3)-C(11)-C(10)    | 123.4(2)   |
| C(6)-C(1)-N(1)     | 119.5(2)   | C(12)-C(11)-C(10)   | 126.7(2)   |
| C(3)-C(2)-C(1)     | 117.6(2)   | C(13)-C(12)-C(11)   | 104.8(2)   |
| C(3)-C(2)-C(24)    | 119.7(2)   | C(13)-C(12)-H(12A)  | 127.6      |
| C(1)-C(2)-C(24)    | 122.5(2)   | C(11)-C(12)-H(12A)  | 127.6      |
| C(4)-C(3)-C(2)     | 120.7(3)   | N(4)-C(13)-C(12)    | 110.0(2)   |
| C(4)-C(3)-H(3A)    | 119.7      | N(4)-C(13)-C(14)    | 123.0(2)   |
| C(2)-C(3)-H(3A)    | 119.7      | C(12)-C(13)-C(14)   | 126.9(2)   |
| C(5)-C(4)-C(3)     | 120.8(3)   | N(5)-C(14)-C(13)    | 112.68(18) |
| C(5)-C(4)-H(4B)    | 119.6      | N(5)-C(14)-H(14A)   | 109.1      |
| C(3)-C(4)-H(4B)    | 119.6      | C(13)-C(14)-H(14A)  | 109.1      |
| C(4)-C(5)-C(6)     | 121.0(2)   | N(5)-C(14)-H(14B)   | 109.1      |
| C(4)-C(5)-H(5A)    | 119.5      | C(13)-C(14)-H(14B)  | 109.1      |
| C(6)-C(5)-H(5A)    | 119.5      | H(14A)-C(14)-H(14B) | 107.8      |
| C(5)-C(6)-C(1)     | 117.4(3)   | N(5)-C(15)-N(6)     | 105.28(19) |
| C(5)-C(6)-C(27)    | 120.0(2)   | N(5)-C(15)-Ni(1)#1  | 126.52(17) |
| C(1)-C(6)-C(27)    | 122.6(2)   | N(6)-C(15)-Ni(1)#1  | 125.57(17) |
| N(2)-C(7)-N(1)     | 105.2(2)   | C(17)-C(16)-N(5)    | 106.6(2)   |

|                     |          |                     |          |
|---------------------|----------|---------------------|----------|
| C(17)-C(16)-H(16A)  | 126.7    | H(25A)-C(25)-H(25C) | 109.5    |
| N(5)-C(16)-H(16A)   | 126.7    | H(25B)-C(25)-H(25C) | 109.5    |
| C(16)-C(17)-N(6)    | 107.4(2) | C(24)-C(26)-H(26A)  | 109.5    |
| C(16)-C(17)-H(17A)  | 126.3    | C(24)-C(26)-H(26B)  | 109.5    |
| N(6)-C(17)-H(17A)   | 126.3    | H(26A)-C(26)-H(26B) | 109.5    |
| C(23)-C(18)-C(19)   | 122.6(2) | C(24)-C(26)-H(26C)  | 109.5    |
| C(23)-C(18)-N(6)    | 119.1(2) | H(26A)-C(26)-H(26C) | 109.5    |
| C(19)-C(18)-N(6)    | 118.3(2) | H(26B)-C(26)-H(26C) | 109.5    |
| C(20)-C(19)-C(18)   | 117.0(3) | C(6)-C(27)-C(28)    | 112.4(3) |
| C(20)-C(19)-C(30)   | 119.8(3) | C(6)-C(27)-C(29)    | 110.2(2) |
| C(18)-C(19)-C(30)   | 123.0(2) | C(28)-C(27)-C(29)   | 110.6(2) |
| C(21)-C(20)-C(19)   | 121.0(3) | C(6)-C(27)-H(27A)   | 107.8    |
| C(21)-C(20)-H(20A)  | 119.5    | C(28)-C(27)-H(27A)  | 107.8    |
| C(19)-C(20)-H(20A)  | 119.5    | C(29)-C(27)-H(27A)  | 107.8    |
| C(22)-C(21)-C(20)   | 120.6(3) | C(27)-C(28)-H(28A)  | 109.5    |
| C(22)-C(21)-H(21A)  | 119.7    | C(27)-C(28)-H(28B)  | 109.5    |
| C(20)-C(21)-H(21A)  | 119.7    | H(28A)-C(28)-H(28B) | 109.5    |
| C(21)-C(22)-C(23)   | 121.4(3) | C(27)-C(28)-H(28C)  | 109.5    |
| C(21)-C(22)-H(22A)  | 119.3    | H(28A)-C(28)-H(28C) | 109.5    |
| C(23)-C(22)-H(22A)  | 119.3    | H(28B)-C(28)-H(28C) | 109.5    |
| C(22)-C(23)-C(18)   | 117.3(3) | C(27)-C(29)-H(29A)  | 109.5    |
| C(22)-C(23)-C(33)   | 119.7(3) | C(27)-C(29)-H(29B)  | 109.5    |
| C(18)-C(23)-C(33)   | 123.0(2) | H(29A)-C(29)-H(29B) | 109.5    |
| C(2)-C(24)-C(25)    | 113.5(2) | C(27)-C(29)-H(29C)  | 109.5    |
| C(2)-C(24)-C(26)    | 109.1(2) | H(29A)-C(29)-H(29C) | 109.5    |
| C(25)-C(24)-C(26)   | 109.2(2) | H(29B)-C(29)-H(29C) | 109.5    |
| C(2)-C(24)-H(24A)   | 108.3    | C(19)-C(30)-C(32)   | 113.5(2) |
| C(25)-C(24)-H(24A)  | 108.3    | C(19)-C(30)-C(31)   | 108.9(2) |
| C(26)-C(24)-H(24A)  | 108.3    | C(32)-C(30)-C(31)   | 109.4(2) |
| C(24)-C(25)-H(25A)  | 109.5    | C(19)-C(30)-H(30A)  | 108.3    |
| C(24)-C(25)-H(25B)  | 109.5    | C(32)-C(30)-H(30A)  | 108.3    |
| H(25A)-C(25)-H(25B) | 109.5    | C(31)-C(30)-H(30A)  | 108.3    |
| C(24)-C(25)-H(25C)  | 109.5    | C(30)-C(31)-H(31A)  | 109.5    |

Electronic Supplementary Information for Dalton Transactions  
 This journal is © The Royal Society of Chemistry 2007

|                     |            |                     |            |
|---------------------|------------|---------------------|------------|
| C(30)-C(31)-H(31B)  | 109.5      | F(2)-P(1)-F(1)      | 87.5(2)    |
| H(31A)-C(31)-H(31B) | 109.5      | F(5)-P(1)-F(1)      | 92.1(2)    |
| C(30)-C(31)-H(31C)  | 109.5      | F(6)-P(1)-F(4)      | 89.45(14)  |
| H(31A)-C(31)-H(31C) | 109.5      | F(2)-P(1)-F(4)      | 90.18(15)  |
| H(31B)-C(31)-H(31C) | 109.5      | F(5)-P(1)-F(4)      | 91.32(14)  |
| C(30)-C(32)-H(32A)  | 109.5      | F(1)-P(1)-F(4)      | 91.73(14)  |
| C(30)-C(32)-H(32B)  | 109.5      | F(6)-P(1)-F(3)      | 91.39(14)  |
| H(32A)-C(32)-H(32B) | 109.5      | F(2)-P(1)-F(3)      | 89.57(13)  |
| C(30)-C(32)-H(32C)  | 109.5      | F(5)-P(1)-F(3)      | 88.94(12)  |
| H(32A)-C(32)-H(32C) | 109.5      | F(1)-P(1)-F(3)      | 87.41(14)  |
| H(32B)-C(32)-H(32C) | 109.5      | F(4)-P(1)-F(3)      | 179.12(13) |
| C(23)-C(33)-C(34)   | 112.8(3)   | C(37)-O(1)-C(40)    | 107.0(4)   |
| C(23)-C(33)-C(35)   | 109.6(3)   | O(1)-C(37)-C(38)    | 110.6(3)   |
| C(34)-C(33)-C(35)   | 110.3(3)   | O(1)-C(37)-H(37A)   | 109.5      |
| C(23)-C(33)-H(33A)  | 108.0      | C(38)-C(37)-H(37A)  | 109.5      |
| C(34)-C(33)-H(33A)  | 108.0      | O(1)-C(37)-H(37B)   | 109.5      |
| C(35)-C(33)-H(33A)  | 108.0      | C(38)-C(37)-H(37B)  | 109.5      |
| C(33)-C(34)-H(34A)  | 109.5      | H(37A)-C(37)-H(37B) | 108.1      |
| C(33)-C(34)-H(34B)  | 109.5      | C(37)-C(38)-C(39)   | 105.1(3)   |
| H(34A)-C(34)-H(34B) | 109.5      | C(37)-C(38)-H(38A)  | 110.7      |
| C(33)-C(34)-H(34C)  | 109.5      | C(39)-C(38)-H(38A)  | 110.7      |
| H(34A)-C(34)-H(34C) | 109.5      | C(37)-C(38)-H(38B)  | 110.7      |
| H(34B)-C(34)-H(34C) | 109.5      | C(39)-C(38)-H(38B)  | 110.7      |
| C(33)-C(35)-H(35A)  | 109.5      | H(38A)-C(38)-H(38B) | 108.8      |
| C(33)-C(35)-H(35B)  | 109.5      | C(40)-C(39)-C(38)   | 105.8(3)   |
| H(35A)-C(35)-H(35B) | 109.5      | C(40)-C(39)-H(39A)  | 110.6      |
| C(33)-C(35)-H(35C)  | 109.5      | C(38)-C(39)-H(39A)  | 110.6      |
| H(35A)-C(35)-H(35C) | 109.5      | C(40)-C(39)-H(39B)  | 110.6      |
| H(35B)-C(35)-H(35C) | 109.5      | C(38)-C(39)-H(39B)  | 110.6      |
| F(6)-P(1)-F(2)      | 90.7(2)    | H(39A)-C(39)-H(39B) | 108.7      |
| F(6)-P(1)-F(5)      | 89.62(17)  | C(39)-C(40)-O(1)    | 109.8(3)   |
| F(2)-P(1)-F(5)      | 178.47(14) | C(39)-C(40)-H(40A)  | 109.7      |
| F(6)-P(1)-F(1)      | 177.9(2)   | O(1)-C(40)-H(40A)   | 109.7      |

|                    |       |                     |       |
|--------------------|-------|---------------------|-------|
| C(39)-C(40)-H(40B) | 109.7 | H(40A)-C(40)-H(40B) | 108.2 |
| O(1)-C(40)-H(40B)  | 109.7 |                     |       |

---

Symmetry transformations used to generate

equivalent atoms:

#1 -x+1,y,-z+1/2

Table 4. Anisotropic displacement parameters ( $\text{\AA}^2 \times 10^3$ ). The anisotropic displacement factor exponent takes the form:  $-2\pi^2 [h^2 a^{*2} U_{11} + \dots + 2 h k a^* b^* U_{12}]$

|     | $U_{11}$ | $U_{22}$ | $U_{33}$ | $U_{23}$ | $U_{13}$ | $U_{12}$ |
|-----|----------|----------|----------|----------|----------|----------|
| Ni1 | 19(1)    | 19(1)    | 21(1)    | -3(1)    | 9(1)     | -3(1)    |
| N1  | 27(1)    | 28(1)    | 30(1)    | -6(1)    | 15(1)    | -1(1)    |
| N2  | 28(1)    | 28(1)    | 25(1)    | -6(1)    | 13(1)    | -4(1)    |
| N3  | 21(1)    | 21(1)    | 22(1)    | 0(1)     | 9(1)     | -2(1)    |
| N4  | 19(1)    | 22(1)    | 21(1)    | 1(1)     | 8(1)     | 0(1)     |
| N5  | 21(1)    | 25(1)    | 28(1)    | 2(1)     | 9(1)     | 3(1)     |
| N6  | 27(1)    | 26(1)    | 28(1)    | -1(1)    | 11(1)    | 5(1)     |
| C1  | 26(1)    | 24(1)    | 35(1)    | -6(1)    | 13(1)    | 4(1)     |
| C2  | 29(1)    | 25(1)    | 37(1)    | -3(1)    | 14(1)    | 5(1)     |
| C3  | 37(1)    | 29(1)    | 38(1)    | 0(1)     | 12(1)    | 9(1)     |
| C4  | 31(1)    | 36(1)    | 41(2)    | -2(1)    | 4(1)     | 10(1)    |
| C5  | 25(1)    | 34(1)    | 56(2)    | -6(1)    | 13(1)    | 4(1)     |
| C6  | 28(1)    | 26(1)    | 45(2)    | -5(1)    | 17(1)    | 3(1)     |
| C7  | 25(1)    | 24(1)    | 26(1)    | -1(1)    | 14(1)    | -3(1)    |
| C8  | 39(1)    | 34(1)    | 40(2)    | -13(1)   | 20(1)    | 0(1)     |
| C9  | 40(1)    | 36(1)    | 32(1)    | -14(1)   | 19(1)    | -5(1)    |
| C10 | 29(1)    | 32(1)    | 22(1)    | -3(1)    | 10(1)    | -3(1)    |
| C11 | 25(1)    | 24(1)    | 21(1)    | -1(1)    | 8(1)     | -5(1)    |
| C12 | 22(1)    | 30(1)    | 23(1)    | 0(1)     | 4(1)     | -4(1)    |
| C13 | 21(1)    | 21(1)    | 25(1)    | 2(1)     | 7(1)     | -2(1)    |
| C14 | 20(1)    | 28(1)    | 27(1)    | 0(1)     | 6(1)     | 0(1)     |
| C15 | 23(1)    | 22(1)    | 27(1)    | 1(1)     | 12(1)    | 1(1)     |
| C16 | 28(1)    | 31(1)    | 38(1)    | 4(1)     | 11(1)    | 11(1)    |
| C17 | 33(1)    | 32(1)    | 43(2)    | 0(1)     | 15(1)    | 13(1)    |
| C18 | 33(1)    | 26(1)    | 30(1)    | -5(1)    | 11(1)    | 8(1)     |
| C19 | 33(1)    | 26(1)    | 35(1)    | -6(1)    | 11(1)    | 7(1)     |
| C20 | 37(1)    | 39(2)    | 40(2)    | -11(1)   | 8(1)     | 4(1)     |
| C21 | 48(2)    | 50(2)    | 31(1)    | -10(1)   | 5(1)     | 11(1)    |
| C22 | 59(2)    | 45(2)    | 30(1)    | -2(1)    | 18(1)    | 14(1)    |

Electronic Supplementary Information for Dalton Transactions  
This journal is © The Royal Society of Chemistry 2007

|     |        |        |        |        |        |        |
|-----|--------|--------|--------|--------|--------|--------|
| C23 | 42(1)  | 30(1)  | 33(1)  | -2(1)  | 16(1)  | 9(1)   |
| C24 | 30(1)  | 33(1)  | 39(1)  | 2(1)   | 16(1)  | 3(1)   |
| C25 | 45(2)  | 37(2)  | 49(2)  | 4(1)   | 26(1)  | 6(1)   |
| C26 | 52(2)  | 39(2)  | 69(2)  | -16(2) | 32(2)  | -10(1) |
| C27 | 29(1)  | 40(2)  | 51(2)  | 2(1)   | 20(1)  | 3(1)   |
| C28 | 41(2)  | 48(2)  | 72(2)  | 2(2)   | 26(2)  | -7(1)  |
| C29 | 55(2)  | 57(2)  | 62(2)  | -7(2)  | 36(2)  | 6(2)   |
| C30 | 32(1)  | 31(1)  | 37(1)  | -5(1)  | 13(1)  | 3(1)   |
| C31 | 50(2)  | 38(2)  | 57(2)  | 8(1)   | 25(2)  | 13(1)  |
| C32 | 37(1)  | 34(1)  | 58(2)  | -7(1)  | 20(1)  | -1(1)  |
| C33 | 49(2)  | 42(2)  | 39(2)  | -1(1)  | 25(1)  | 4(1)   |
| C34 | 71(2)  | 57(2)  | 49(2)  | 6(2)   | 33(2)  | -2(2)  |
| C35 | 60(2)  | 62(2)  | 79(3)  | -3(2)  | 41(2)  | 13(2)  |
| P1  | 58(1)  | 34(1)  | 29(1)  | -3(1)  | 17(1)  | -3(1)  |
| F1  | 293(5) | 64(2)  | 158(3) | -7(2)  | 191(4) | -3(2)  |
| F2  | 156(3) | 70(2)  | 85(2)  | 13(1)  | -55(2) | -50(2) |
| F3  | 68(1)  | 37(1)  | 54(1)  | -6(1)  | 0(1)   | 1(1)   |
| F4  | 118(2) | 33(1)  | 80(2)  | 1(1)   | 49(2)  | 0(1)   |
| F5  | 52(1)  | 65(2)  | 115(2) | 28(1)  | -5(1)  | -3(1)  |
| F6  | 112(2) | 87(2)  | 112(2) | -11(2) | 85(2)  | -14(2) |
| O1  | 84(2)  | 102(3) | 104(3) | 31(2)  | 52(2)  | 19(2)  |
| C37 | 70(3)  | 123(4) | 73(3)  | 9(3)   | 40(2)  | -5(3)  |
| C38 | 131(5) | 70(3)  | 177(6) | -19(4) | 97(5)  | -16(3) |
| C39 | 165(6) | 77(3)  | 84(4)  | -1(3)  | 41(4)  | -21(4) |
| C40 | 101(4) | 127(5) | 125(5) | 47(4)  | 83(4)  | 31(4)  |

---



Table 5. Torsion angles [°].

|                  |             |                  |             |
|------------------|-------------|------------------|-------------|
| C15#1-Ni1-N3-C11 | 67.9(2)     | C10-N2-C7-Ni1    | 16.4(3)     |
| C7-Ni1-N3-C11    | -34.68(19)  | C8-N1-C7-N2      | 0.3(3)      |
| N4#1-Ni1-N3-C11  | 177.27(17)  | C1-N1-C7-N2      | -167.9(2)   |
| C15#1-Ni1-N3-N4  | -86.1(2)    | C8-N1-C7-Ni1     | 163.25(18)  |
| C7-Ni1-N3-N4     | 171.29(17)  | C1-N1-C7-Ni1     | -4.9(3)     |
| N4#1-Ni1-N3-N4   | 23.24(15)   | C15#1-Ni1-C7-N2  | -127.6(2)   |
| C11-N3-N4-C13    | 0.5(2)      | N3-Ni1-C7-N2     | 18.5(2)     |
| Ni1-N3-N4-C13    | 158.11(15)  | N4#1-Ni1-C7-N2   | 131.4(2)    |
| C11-N3-N4-Ni1#1  | 158.26(15)  | C15#1-Ni1-C7-N1  | 73.1(2)     |
| Ni1-N3-N4-Ni1#1  | -44.2(2)    | N3-Ni1-C7-N1     | -140.9(2)   |
| C7-N1-C1-C2      | 73.5(3)     | N4#1-Ni1-C7-N1   | -27.9(3)    |
| C8-N1-C1-C2      | -92.9(3)    | C7-N1-C8-C9      | -0.2(3)     |
| C7-N1-C1-C6      | -108.0(3)   | C1-N1-C8-C9      | 168.0(2)    |
| C8-N1-C1-C6      | 85.6(3)     | N1-C8-C9-N2      | 0.1(3)      |
| C6-C1-C2-C3      | 5.4(4)      | C7-N2-C9-C8      | 0.0(3)      |
| N1-C1-C2-C3      | -176.1(2)   | C10-N2-C9-C8     | -179.2(2)   |
| C6-C1-C2-C24     | -169.6(2)   | C7-N2-C10-C11    | -42.0(3)    |
| N1-C1-C2-C24     | 8.9(3)      | C9-N2-C10-C11    | 137.2(2)    |
| C1-C2-C3-C4      | -2.8(4)     | N4-N3-C11-C12    | -0.5(2)     |
| C24-C2-C3-C4     | 172.4(2)    | Ni1-N3-C11-C12   | -158.08(16) |
| C2-C3-C4-C5      | -1.4(4)     | N4-N3-C11-C10    | 175.1(2)    |
| C3-C4-C5-C6      | 3.0(4)      | Ni1-N3-C11-C10   | 17.5(3)     |
| C4-C5-C6-C1      | -0.4(4)     | N2-C10-C11-N3    | 24.0(3)     |
| C4-C5-C6-C27     | -177.6(2)   | N2-C10-C11-C12   | -161.2(2)   |
| C2-C1-C6-C5      | -3.9(4)     | N3-C11-C12-C13   | 0.3(3)      |
| N1-C1-C6-C5      | 177.7(2)    | C10-C11-C12-C13  | -175.1(2)   |
| C2-C1-C6-C27     | 173.2(2)    | N3-N4-C13-C12    | -0.4(2)     |
| N1-C1-C6-C27     | -5.2(4)     | Ni1#1-N4-C13-C12 | -158.45(16) |
| C9-N2-C7-N1      | -0.2(3)     | N3-N4-C13-C14    | 176.7(2)    |
| C10-N2-C7-N1     | 179.1(2)    | Ni1#1-N4-C13-C14 | 18.7(3)     |
| C9-N2-C7-Ni1     | -162.88(18) | C11-C12-C13-N4   | 0.1(3)      |

|                  |             |                 |           |
|------------------|-------------|-----------------|-----------|
| C11-C12-C13-C14  | -176.9(2)   | C20-C21-C22-C23 | 1.5(5)    |
| C15-N5-C14-C13   | -43.6(3)    | C21-C22-C23-C18 | 0.3(4)    |
| C16-N5-C14-C13   | 135.4(2)    | C21-C22-C23-C33 | -176.5(3) |
| N4-C13-C14-N5    | 24.7(3)     | C19-C18-C23-C22 | -3.0(4)   |
| C12-C13-C14-N5   | -158.7(2)   | N6-C18-C23-C22  | 179.2(2)  |
| C16-N5-C15-N6    | -0.3(3)     | C19-C18-C23-C33 | 173.7(2)  |
| C14-N5-C15-N6    | 178.8(2)    | N6-C18-C23-C33  | -4.1(4)   |
| C16-N5-C15-Ni1#1 | -162.60(18) | C3-C2-C24-C25   | 30.4(3)   |
| C14-N5-C15-Ni1#1 | 16.5(3)     | C1-C2-C24-C25   | -154.7(2) |
| C17-N6-C15-N5    | 0.0(3)      | C3-C2-C24-C26   | -91.7(3)  |
| C18-N6-C15-N5    | -172.0(2)   | C1-C2-C24-C26   | 83.2(3)   |
| C17-N6-C15-Ni1#1 | 162.56(18)  | C5-C6-C27-C28   | -46.3(3)  |
| C18-N6-C15-Ni1#1 | -9.5(3)     | C1-C6-C27-C28   | 136.7(3)  |
| C15-N5-C16-C17   | 0.4(3)      | C5-C6-C27-C29   | 77.5(3)   |
| C14-N5-C16-C17   | -178.6(2)   | C1-C6-C27-C29   | -99.5(3)  |
| N5-C16-C17-N6    | -0.4(3)     | C20-C19-C30-C32 | 27.8(3)   |
| C15-N6-C17-C16   | 0.2(3)      | C18-C19-C30-C32 | -157.4(2) |
| C18-N6-C17-C16   | 172.3(2)    | C20-C19-C30-C31 | -94.4(3)  |
| C15-N6-C18-C23   | -106.2(3)   | C18-C19-C30-C31 | 80.4(3)   |
| C17-N6-C18-C23   | 82.9(3)     | C22-C23-C33-C34 | -46.6(4)  |
| C15-N6-C18-C19   | 76.0(3)     | C18-C23-C33-C34 | 136.8(3)  |
| C17-N6-C18-C19   | -94.9(3)    | C22-C23-C33-C35 | 76.7(3)   |
| C23-C18-C19-C20  | 3.8(4)      | C18-C23-C33-C35 | -99.9(3)  |
| N6-C18-C19-C20   | -178.5(2)   | C40-O1-C37-C38  | 4.2(7)    |
| C23-C18-C19-C30  | -171.1(2)   | O1-C37-C38-C39  | -10.8(7)  |
| N6-C18-C19-C30   | 6.6(3)      | C37-C38-C39-C40 | 13.2(7)   |
| C18-C19-C20-C21  | -1.9(4)     | C38-C39-C40-O1  | -11.2(7)  |
| C30-C19-C20-C21  | 173.2(3)    | C37-O1-C40-C39  | 4.7(7)    |
| C19-C20-C21-C22  | -0.7(4)     |                 |           |

---

Symmetry transformations used to generate

equivalent atoms:

#1 -x+1,y,-z+1/2

**X-ray Structure of 5 (Bisrhodium Complex)**

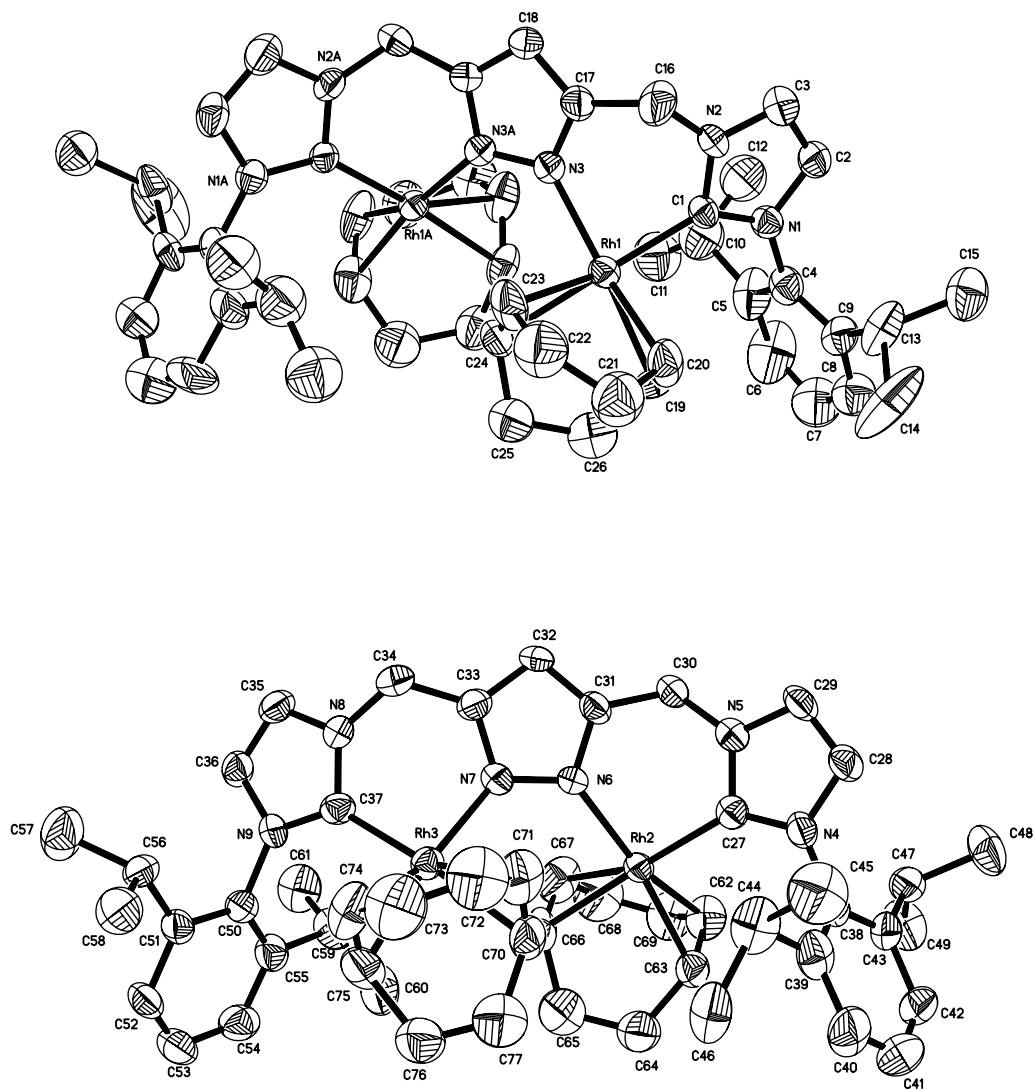

#### Data collection

A crystal (approximate dimensions 0.50 x 0.50 x 0.40 mm<sup>3</sup>) was placed onto the tip of a 0.1 mm diameter glass capillary and mounted on a Siemens SMART Platform CCD diffractometer for a data collection at 173(2) K.<sup>1</sup> A preliminary set of cell constants was calculated from reflections harvested from three sets of 20 frames. These initial sets of frames were oriented such that orthogonal wedges of reciprocal space were surveyed. This produced initial orientation matrices determined from 233 reflections. The data collection was carried out using MoK $\alpha$  radiation (graphite monochromator) with a frame time of 30 seconds and a detector distance of 4.957 cm. A randomly oriented region of reciprocal space was surveyed to the extent of one sphere and to a resolution of 0.84 Å. Four major sections of frames were collected with 0.30° steps in  $\omega$  at four different  $\phi$  settings and a detector position of -28° in  $2\theta$ . The intensity data were corrected for absorption and decay (SADABS).<sup>2</sup> Final cell constants were calculated from the xyz centroids of 3958 strong reflections from the actual data collection after integration (SAINT).<sup>3</sup> Please refer to Table 1 for additional crystal and refinement information.

#### Structure solution and refinement

The structure was solved using SHELXS-97<sup>4</sup> and refined using SHELXL-97.<sup>4</sup> The space group *C*2 was determined based on systematic absences and intensity statistics. A direct-methods solution was calculated which provided most non-hydrogen atoms from the E-map. Full-matrix least squares / difference Fourier cycles were performed which located the remaining non-hydrogen atoms. All non-hydrogen atoms were refined with anisotropic displacement parameters. All hydrogen atoms were placed in ideal positions and refined as riding atoms with relative isotropic displacement parameters. The function SQUEEZE in the program PLATON<sup>5</sup> was used to model solvent accessible void space. A void space of 2332.0 Å<sup>3</sup>, containing 773 electrons per cell, was found. The final full matrix least squares refinement converged to  $R1 = 0.0397$  and  $wR2 = 0.1047$  ( $F^2$ , all data).

#### Structure description

The sample is structurally analogous to the Ir sample. The sample consists of one Rh dimer, with a  $\text{PF}_6^-$  counterion, on general positions, and a second dimer, with a  $\text{PF}_6^-$  counterion, on different 2-fold axis. The  $\text{PF}_6^-$  counterion on the 2-fold axis (P2-F12) was modeled as disordered over two positions (91:9), as well as over the 2-fold axis. Two isopropyl groups were modeled as disordered over two positions: C10-C12 (78:22) and C44-C46 (72:28). An ISOR restraint (restrains the  $U_{ij}$ 's of the atoms to be more isotropic in character) was used to help model the displacement parameters on the isopropyl group C10-C12. A DELU restraint (forces the atoms to have displacement parameters in the same direction) was also used to help model the displacement parameters. An ISOR restraint was used to help model the displacement parameters for all of the coordinated COD ligands. A DELU restraint was also used to help model the displacement parameters of the COD ligands. While the COD ligands appear to be disordered, no disorder model could be found that would make sense structurally and chemically (thus the use of the restraints). As stated earlier, the SQUEEZE function removed 2332.0  $\text{\AA}^3$  of solvent accessible void space, containing 773 electrons per cell. This corresponds to roughly 4.5  $\text{CH}_2\text{Cl}_2$  molecules per asymmetric unit (4  $\text{CH}_2\text{Cl}_2$  molecules per asymmetric unit would have 672 electrons and 5 per asymmetric unit would have 840 electrons).

---

<sup>1</sup> SMART V5.054, Bruker Analytical X-ray Systems, Madison, WI (2001).

<sup>2</sup> An empirical correction for absorption anisotropy, R. Blessing, *Acta Cryst.* **A51**, 33-38 (1995).

<sup>3</sup> SAINT+ V6.45, Bruker Analytical X-Ray Systems, Madison, WI (2003).

<sup>4</sup> SHELXTL V6.14, Bruker Analytical X-Ray Systems, Madison, WI (2000).

<sup>5</sup> A. L. Spek, *Acta. Cryst.* **A46**, C34 (1990). PLATON, A Multipurpose Crystallographic Tool, Utrecht

Electronic Supplementary Information for Dalton Transactions  
This journal is © The Royal Society of Chemistry 2007

University, Utrecht, The Netherlands, A. L. Spek (2000).

**Tables for 5 (Bisrhodium complex)**

Table 1. Crystal data and structure refinement.

|                                        |                                                                                 |                           |
|----------------------------------------|---------------------------------------------------------------------------------|---------------------------|
| Identification code                    | 07066s                                                                          |                           |
| Empirical formula                      | C <sub>51</sub> H <sub>67</sub> F <sub>6</sub> N <sub>6</sub> P Rh <sub>2</sub> |                           |
| Formula weight                         | 1114.90                                                                         |                           |
| Temperature                            | 173(2) K                                                                        |                           |
| Wavelength                             | 0.71073 Å                                                                       |                           |
| Crystal system                         | Monoclinic                                                                      |                           |
| Space group                            | C2                                                                              |                           |
| Unit cell dimensions                   | $a = 30.849(4)$ Å                                                               | $\alpha = 90^\circ$       |
|                                        | $b = 18.153(2)$ Å                                                               | $\beta = 92.222(2)^\circ$ |
|                                        | $c = 16.475(2)$ Å                                                               | $\gamma = 90^\circ$       |
| Volume                                 | 9219.1(19) Å <sup>3</sup>                                                       |                           |
| Z                                      | 6                                                                               |                           |
| Density (calculated)                   | 1.205 Mg/m <sup>3</sup>                                                         |                           |
| Absorption coefficient                 | 0.615 mm <sup>-1</sup>                                                          |                           |
| $F(000)$                               | 3444                                                                            |                           |
| Crystal color, morphology              | yellow, block                                                                   |                           |
| Crystal size                           | 0.50 x 0.50 x 0.40 mm <sup>3</sup>                                              |                           |
| Theta range for data collection        | 1.24 to 25.04°                                                                  |                           |
| Index ranges                           | $-36 \leq h \leq 36, -21 \leq k \leq 21, -19 \leq l \leq 19$                    |                           |
| Reflections collected                  | 45510                                                                           |                           |
| Independent reflections                | 16350 [ $R(\text{int}) = 0.0311$ ]                                              |                           |
| Observed reflections                   | 15285                                                                           |                           |
| Completeness to theta = 25.04°         | 100.0%                                                                          |                           |
| Absorption correction                  | Multi-scan                                                                      |                           |
| Max. and min. transmission             | 0.7911 and 0.7486                                                               |                           |
| Refinement method                      | Full-matrix least-squares on $F^2$                                              |                           |
| Data / restraints / parameters         | 16350 / 347 / 959                                                               |                           |
| Goodness-of-fit on $F^2$               | 1.026                                                                           |                           |
| Final $R$ indices [ $I > 2\sigma(I)$ ] | $R1 = 0.0397, wR2 = 0.1027$                                                     |                           |
| $R$ indices (all data)                 | $R1 = 0.0425, wR2 = 0.1047$                                                     |                           |
| Absolute structure parameter           | 0.06(2)                                                                         |                           |

Electronic Supplementary Information for Dalton Transactions  
This journal is © The Royal Society of Chemistry 2007

Largest diff. peak and hole

0.736 and -1.122 e.Å<sup>-3</sup>



Table 2. Atomic coordinates ( $\times 10^4$ ) and equivalent isotropic displacement parameters ( $\text{\AA}^2 \times 10^3$ ).  $U_{\text{eq}}$  is defined as one third of the trace of the orthogonalized  $U_{ij}$  tensor.

|      | x        | y        | z         | $U_{\text{eq}}$ |
|------|----------|----------|-----------|-----------------|
| Rh1  | 4575(1)  | 2040(1)  | 5977(1)   | 32(1)           |
| Rh2  | 1922(1)  | 1696(1)  | 7620(1)   | 31(1)           |
| Rh3  | 1549(1)  | 2898(1)  | 9667(1)   | 33(1)           |
| P1   | 4615(1)  | 5973(1)  | 6484(1)   | 39(1)           |
| F1   | 4852(2)  | 6412(3)  | 7204(3)   | 105(2)          |
| F2   | 4827(2)  | 6459(2)  | 5825(3)   | 106(2)          |
| F3   | 4360(1)  | 5494(2)  | 5807(2)   | 71(1)           |
| F4   | 4384(2)  | 5471(2)  | 7136(3)   | 83(1)           |
| F5   | 5009(1)  | 5415(2)  | 6431(3)   | 73(1)           |
| F6   | 4228(1)  | 6531(2)  | 6527(2)   | 72(1)           |
| P2   | 5025(2)  | 4705(1)  | 9933(4)   | 45(1)           |
| F7   | 5257(3)  | 4708(4)  | 9098(5)   | 70(2)           |
| F8   | 5428(3)  | 5109(6)  | 10349(6)  | 81(5)           |
| F9   | 4814(4)  | 5476(3)  | 9718(7)   | 86(4)           |
| F10  | 4620(3)  | 4307(6)  | 9515(5)   | 100(6)          |
| F11  | 5232(4)  | 3933(4)  | 10143(5)  | 84(4)           |
| F12  | 4792(3)  | 4705(5)  | 10766(5)  | 70(2)           |
| P2'  | 5025(2)  | 4705(1)  | 9933(4)   | 45(1)           |
| F7'  | 5310(20) | 4670(50) | 9160(30)  | 70(2)           |
| F8'  | 5080(30) | 5568(7)  | 9960(60)  | 81(5)           |
| F9'  | 4604(17) | 4800(60) | 9370(40)  | 86(4)           |
| F10' | 4970(30) | 3843(8)  | 9910(60)  | 100(6)          |
| F11' | 5445(17) | 4610(60) | 10500(50) | 84(4)           |
| F12' | 4740(20) | 4740(50) | 10700(30) | 70(2)           |
| N1   | 4936(1)  | 2446(2)  | 7786(2)   | 36(1)           |
| N2   | 4748(2)  | 3348(2)  | 7012(2)   | 42(1)           |
| N3   | 4896(1)  | 2872(2)  | 5356(2)   | 35(1)           |
| N4   | 1557(1)  | 2120(3)  | 5834(2)   | 38(1)           |
| N5   | 1145(1)  | 1462(2)  | 6545(2)   | 37(1)           |
| N6   | 1347(1)  | 1775(2)  | 8246(2)   | 34(1)           |

Electronic Supplementary Information for Dalton Transactions  
This journal is © The Royal Society of Chemistry 2007

|      |          |          |          |        |
|------|----------|----------|----------|--------|
| N7   | 1275(1)  | 2011(2)  | 9014(2)  | 36(1)  |
| N8   | 1003(1)  | 1944(2)  | 10668(2) | 38(1)  |
| N9   | 1551(1)  | 2204(2)  | 11452(2) | 36(1)  |
| C1   | 4771(2)  | 2604(3)  | 7019(3)  | 31(1)  |
| C2   | 5003(2)  | 3092(3)  | 8233(3)  | 49(1)  |
| C3   | 4886(2)  | 3675(4)  | 7736(3)  | 54(1)  |
| C4   | 5010(2)  | 1738(3)  | 8132(3)  | 45(1)  |
| C5   | 5385(2)  | 1364(4)  | 7937(4)  | 65(2)  |
| C6   | 5450(3)  | 674(5)   | 8288(5)  | 98(3)  |
| C7   | 5159(3)  | 359(5)   | 8751(5)  | 87(2)  |
| C8   | 4801(2)  | 755(4)   | 8966(4)  | 64(2)  |
| C9   | 4714(2)  | 1445(3)  | 8659(3)  | 46(1)  |
| C10  | 5736(2)  | 1729(4)  | 7408(4)  | 78(2)  |
| C11  | 6063(4)  | 1254(7)  | 7035(7)  | 94(2)  |
| C12  | 5995(4)  | 2263(7)  | 7905(6)  | 82(2)  |
| C10' | 5736(2)  | 1729(4)  | 7408(4)  | 78(2)  |
| C11' | 5868(13) | 1026(12) | 7030(20) | 94(2)  |
| C12' | 6060(8)  | 1840(20) | 8080(14) | 82(2)  |
| C13  | 4307(2)  | 1846(4)  | 8882(3)  | 60(2)  |
| C14  | 3896(3)  | 1397(8)  | 8847(7)  | 139(5) |
| C15  | 4372(2)  | 2214(4)  | 9751(4)  | 71(2)  |
| C16  | 4582(3)  | 3769(3)  | 6325(3)  | 62(2)  |
| C17  | 4832(2)  | 3575(3)  | 5567(3)  | 42(1)  |
| C18  | 5000     | 4047(4)  | 5000     | 56(2)  |
| C19  | 4385(2)  | 1052(4)  | 6580(4)  | 63(2)  |
| C20  | 4042(2)  | 1533(4)  | 6551(4)  | 63(2)  |
| C21  | 3634(3)  | 1451(5)  | 5972(5)  | 82(2)  |
| C22  | 3695(3)  | 1846(5)  | 5173(5)  | 85(2)  |
| C23  | 4145(2)  | 1934(4)  | 4915(3)  | 60(2)  |
| C24  | 4440(2)  | 1365(3)  | 4887(3)  | 51(1)  |
| C25  | 4357(3)  | 579(4)   | 5107(4)  | 71(2)  |
| C26  | 4451(3)  | 396(5)   | 6017(5)  | 81(2)  |
| C27  | 1539(2)  | 1795(3)  | 6570(3)  | 34(1)  |
| C28  | 1183(2)  | 1983(3)  | 5358(3)  | 44(1)  |
| C29  | 926(2)   | 1560(3)  | 5809(3)  | 45(1)  |

Electronic Supplementary Information for Dalton Transactions  
This journal is © The Royal Society of Chemistry 2007

|      |          |          |          |       |
|------|----------|----------|----------|-------|
| C30  | 990(2)   | 988(3)   | 7189(3)  | 42(1) |
| C31  | 999(2)   | 1366(3)  | 7994(3)  | 35(1) |
| C32  | 704(2)   | 1336(3)  | 8580(3)  | 39(1) |
| C33  | 885(1)   | 1746(3)  | 9222(3)  | 39(1) |
| C34  | 690(2)   | 1947(4)  | 9991(3)  | 49(1) |
| C35  | 937(2)   | 1573(3)  | 11402(3) | 43(1) |
| C36  | 1284(2)  | 1744(3)  | 11884(3) | 41(1) |
| C37  | 1373(2)  | 2333(3)  | 10682(3) | 36(1) |
| C38  | 1923(2)  | 2520(3)  | 5519(3)  | 40(1) |
| C39  | 1981(2)  | 3271(3)  | 5724(3)  | 53(2) |
| C40  | 2337(3)  | 3622(4)  | 5406(4)  | 72(2) |
| C41  | 2607(3)  | 3256(4)  | 4891(5)  | 70(2) |
| C42  | 2537(2)  | 2543(4)  | 4674(4)  | 55(2) |
| C43  | 2182(2)  | 2153(3)  | 4986(3)  | 42(1) |
| C44  | 1683(2)  | 3657(3)  | 6289(4)  | 65(2) |
| C45  | 1361(13) | 4085(17) | 5664(19) | 95(3) |
| C46  | 2045(10) | 4162(18) | 6740(20) | 70(3) |
| C44' | 1683(2)  | 3657(3)  | 6289(4)  | 65(2) |
| C45' | 1224(4)  | 3841(11) | 5838(9)  | 95(3) |
| C46' | 1895(6)  | 4337(6)  | 6785(8)  | 70(3) |
| C47  | 2123(2)  | 1360(3)  | 4731(3)  | 47(1) |
| C48  | 1909(2)  | 1326(4)  | 3873(4)  | 68(2) |
| C49  | 2529(3)  | 918(4)   | 4760(5)  | 72(2) |
| C50  | 1941(2)  | 2532(3)  | 11820(3) | 35(1) |
| C51  | 1886(2)  | 3132(3)  | 12343(3) | 39(1) |
| C52  | 2263(2)  | 3433(3)  | 12714(3) | 49(1) |
| C53  | 2658(2)  | 3161(4)  | 12565(4) | 59(2) |
| C54  | 2706(2)  | 2550(4)  | 12053(4) | 54(1) |
| C55  | 2342(2)  | 2219(3)  | 11672(3) | 45(1) |
| C56  | 1445(2)  | 3447(3)  | 12509(3) | 47(1) |
| C57  | 1285(3)  | 3216(5)  | 13359(4) | 84(2) |
| C58  | 1429(2)  | 4292(4)  | 12475(5) | 69(2) |
| C59  | 2393(2)  | 1538(3)  | 11146(4) | 52(1) |
| C60  | 2810(2)  | 1541(5)  | 10697(4) | 77(2) |
| C61  | 2328(3)  | 851(4)   | 11660(5) | 69(2) |

Electronic Supplementary Information for Dalton Transactions  
This journal is © The Royal Society of Chemistry 2007

|     |         |         |          |        |
|-----|---------|---------|----------|--------|
| C62 | 2412(2) | 1173(4) | 6965(4)  | 55(1)  |
| C63 | 2531(2) | 1883(3) | 7091(3)  | 47(1)  |
| C64 | 2870(2) | 2146(4) | 7704(4)  | 65(2)  |
| C65 | 2780(3) | 2034(5) | 8549(5)  | 83(2)  |
| C66 | 2329(2) | 1718(5) | 8740(3)  | 63(2)  |
| C67 | 2203(2) | 1037(5) | 8601(4)  | 68(2)  |
| C68 | 2485(3) | 450(5)  | 8250(6)  | 94(2)  |
| C69 | 2601(3) | 526(5)  | 7429(5)  | 79(2)  |
| C70 | 1847(2) | 3412(4) | 8613(4)  | 60(2)  |
| C71 | 1429(3) | 3583(4) | 8602(4)  | 66(2)  |
| C72 | 1228(3) | 4284(6) | 8887(6)  | 100(2) |
| C73 | 1332(4) | 4493(6) | 9664(6)  | 103(2) |
| C74 | 1534(3) | 3912(3) | 10271(4) | 69(2)  |
| C75 | 1951(3) | 3704(3) | 10276(4) | 63(2)  |
| C76 | 2305(2) | 3983(4) | 9712(4)  | 72(2)  |
| C77 | 2193(3) | 3925(6) | 8888(5)  | 93(2)  |

---

Table 3. Bond lengths [Å] and angles [°].

|             |          |             |           |
|-------------|----------|-------------|-----------|
| Rh(1)-C(1)  | 2.069(4) | N(2)-C(1)   | 1.351(6)  |
| Rh(1)-N(3)  | 2.095(4) | N(2)-C(3)   | 1.386(7)  |
| Rh(1)-C(20) | 2.137(6) | N(2)-C(16)  | 1.443(7)  |
| Rh(1)-C(19) | 2.142(6) | N(3)-C(17)  | 1.340(6)  |
| Rh(1)-C(23) | 2.163(5) | N(3)-N(3)#1 | 1.359(7)  |
| Rh(1)-C(24) | 2.200(5) | N(4)-C(27)  | 1.351(6)  |
| Rh(2)-C(27) | 2.067(5) | N(4)-C(28)  | 1.392(6)  |
| Rh(2)-N(6)  | 2.093(4) | N(4)-C(38)  | 1.454(7)  |
| Rh(2)-C(62) | 2.116(5) | N(5)-C(27)  | 1.355(6)  |
| Rh(2)-C(63) | 2.128(5) | N(5)-C(29)  | 1.376(6)  |
| Rh(2)-C(67) | 2.165(6) | N(5)-C(30)  | 1.460(6)  |
| Rh(2)-C(66) | 2.191(5) | N(6)-C(31)  | 1.355(6)  |
| Rh(3)-C(37) | 2.054(5) | N(6)-N(7)   | 1.361(5)  |
| Rh(3)-C(74) | 2.094(6) | N(7)-C(33)  | 1.354(6)  |
| Rh(3)-N(7)  | 2.097(4) | N(8)-C(37)  | 1.344(6)  |
| Rh(3)-C(75) | 2.141(6) | N(8)-C(35)  | 1.405(6)  |
| Rh(3)-C(71) | 2.171(6) | N(8)-C(34)  | 1.447(6)  |
| Rh(3)-C(70) | 2.203(6) | N(9)-C(37)  | 1.380(6)  |
| P(1)-F(2)   | 1.561(4) | N(9)-C(36)  | 1.388(6)  |
| P(1)-F(6)   | 1.570(4) | N(9)-C(50)  | 1.455(6)  |
| P(1)-F(1)   | 1.584(4) | C(2)-C(3)   | 1.376(9)  |
| P(1)-F(5)   | 1.587(3) | C(2)-H(2A)  | 0.9500    |
| P(1)-F(3)   | 1.598(4) | C(3)-H(3A)  | 0.9500    |
| P(1)-F(4)   | 1.599(4) | C(4)-C(9)   | 1.389(8)  |
| P(2)-F(11)  | 1.574(4) | C(4)-C(5)   | 1.390(8)  |
| P(2)-F(12)  | 1.574(4) | C(5)-C(6)   | 1.390(11) |
| P(2)-F(7)   | 1.575(4) | C(5)-C(10)  | 1.565(11) |
| P(2)-F(10)  | 1.576(4) | C(6)-C(7)   | 1.329(12) |
| P(2)-F(9)   | 1.577(4) | C(6)-H(6A)  | 0.9500    |
| P(2)-F(8)   | 1.578(4) | C(7)-C(8)   | 1.375(11) |
| N(1)-C(1)   | 1.374(6) | C(7)-H(7A)  | 0.9500    |
| N(1)-C(2)   | 1.396(7) | C(8)-C(9)   | 1.373(9)  |
| N(1)-C(4)   | 1.420(7) | C(8)-H(8A)  | 0.9500    |

Electronic Supplementary Information for Dalton Transactions  
This journal is © The Royal Society of Chemistry 2007

|               |           |              |           |
|---------------|-----------|--------------|-----------|
| C(9)-C(13)    | 1.510(8)  | C(20)-H(20A) | 1.0000    |
| C(10)-C(11)   | 1.477(8)  | C(21)-C(22)  | 1.517(11) |
| C(10)-C(12)   | 1.482(8)  | C(21)-H(21A) | 0.9900    |
| C(10)-H(10)   | 1.0000    | C(21)-H(21B) | 0.9900    |
| C(11)-H(11A)  | 0.9800    | C(22)-C(23)  | 1.476(10) |
| C(11)-H(11B)  | 0.9800    | C(22)-H(22A) | 0.9900    |
| C(11)-H(11C)  | 0.9800    | C(22)-H(22B) | 0.9900    |
| C(12)-H(12A)  | 0.9800    | C(23)-C(24)  | 1.379(9)  |
| C(12)-H(12B)  | 0.9800    | C(23)-H(23A) | 1.0000    |
| C(12)-H(12C)  | 0.9800    | C(24)-C(25)  | 1.498(10) |
| C(11')-H(11D) | 0.9800    | C(24)-H(24A) | 1.0000    |
| C(11')-H(11E) | 0.9800    | C(25)-C(26)  | 1.553(11) |
| C(11')-H(11F) | 0.9800    | C(25)-H(25A) | 0.9900    |
| C(12')-H(12D) | 0.9800    | C(25)-H(25B) | 0.9900    |
| C(12')-H(12E) | 0.9800    | C(26)-H(26A) | 0.9900    |
| C(12')-H(12F) | 0.9800    | C(26)-H(26B) | 0.9900    |
| C(13)-C(14)   | 1.504(12) | C(28)-C(29)  | 1.347(8)  |
| C(13)-C(15)   | 1.586(10) | C(28)-H(28A) | 0.9500    |
| C(13)-H(13A)  | 1.0000    | C(29)-H(29A) | 0.9500    |
| C(14)-H(14A)  | 0.9800    | C(30)-C(31)  | 1.493(7)  |
| C(14)-H(14B)  | 0.9800    | C(30)-H(30A) | 0.9900    |
| C(14)-H(14C)  | 0.9800    | C(30)-H(30B) | 0.9900    |
| C(15)-H(15A)  | 0.9800    | C(31)-C(32)  | 1.354(7)  |
| C(15)-H(15B)  | 0.9800    | C(32)-C(33)  | 1.393(7)  |
| C(15)-H(15C)  | 0.9800    | C(32)-H(32A) | 0.9500    |
| C(16)-C(17)   | 1.533(8)  | C(33)-C(34)  | 1.469(7)  |
| C(16)-H(16A)  | 0.9900    | C(34)-H(34A) | 0.9900    |
| C(16)-H(16B)  | 0.9900    | C(34)-H(34B) | 0.9900    |
| C(17)-C(18)   | 1.383(7)  | C(35)-C(36)  | 1.345(7)  |
| C(18)-C(17)#1 | 1.383(7)  | C(35)-H(35A) | 0.9500    |
| C(18)-H(18A)  | 0.9500    | C(36)-H(36A) | 0.9500    |
| C(19)-C(20)   | 1.372(10) | C(38)-C(43)  | 1.382(7)  |
| C(19)-C(26)   | 1.527(11) | C(38)-C(39)  | 1.414(8)  |
| C(19)-H(19A)  | 1.0000    | C(39)-C(40)  | 1.390(10) |
| C(20)-C(21)   | 1.554(10) | C(39)-C(44)  | 1.505(9)  |

Electronic Supplementary Information for Dalton Transactions  
This journal is © The Royal Society of Chemistry 2007

|               |           |              |           |
|---------------|-----------|--------------|-----------|
| C(40)-C(41)   | 1.383(11) | C(52)-C(53)  | 1.346(9)  |
| C(40)-H(40A)  | 0.9500    | C(52)-H(52A) | 0.9500    |
| C(41)-C(42)   | 1.358(10) | C(53)-C(54)  | 1.404(9)  |
| C(41)-H(41A)  | 0.9500    | C(53)-H(53A) | 0.9500    |
| C(42)-C(43)   | 1.416(8)  | C(54)-C(55)  | 1.401(8)  |
| C(42)-H(42A)  | 0.9500    | C(54)-H(54A) | 0.9500    |
| C(43)-C(47)   | 1.509(8)  | C(55)-C(59)  | 1.522(8)  |
| C(44)-C(45)   | 1.604(8)  | C(56)-C(58)  | 1.536(9)  |
| C(44)-C(46)   | 1.607(8)  | C(56)-C(57)  | 1.560(9)  |
| C(44)-H(44)   | 1.0000    | C(56)-H(56A) | 1.0000    |
| C(45)-H(45A)  | 0.9800    | C(57)-H(57A) | 0.9800    |
| C(45)-H(45B)  | 0.9800    | C(57)-H(57B) | 0.9800    |
| C(45)-H(45C)  | 0.9800    | C(57)-H(57C) | 0.9800    |
| C(46)-H(46A)  | 0.9800    | C(58)-H(58A) | 0.9800    |
| C(46)-H(46B)  | 0.9800    | C(58)-H(58B) | 0.9800    |
| C(46)-H(46C)  | 0.9800    | C(58)-H(58C) | 0.9800    |
| C(45')-H(45D) | 0.9800    | C(59)-C(60)  | 1.507(9)  |
| C(45')-H(45E) | 0.9800    | C(59)-C(61)  | 1.525(9)  |
| C(45')-H(45F) | 0.9800    | C(59)-H(59A) | 1.0000    |
| C(46')-H(46D) | 0.9800    | C(60)-H(60A) | 0.9800    |
| C(46')-H(46E) | 0.9800    | C(60)-H(60B) | 0.9800    |
| C(46')-H(46F) | 0.9800    | C(60)-H(60C) | 0.9800    |
| C(47)-C(49)   | 1.486(9)  | C(61)-H(61A) | 0.9800    |
| C(47)-C(48)   | 1.539(8)  | C(61)-H(61B) | 0.9800    |
| C(47)-H(47A)  | 1.0000    | C(61)-H(61C) | 0.9800    |
| C(48)-H(48A)  | 0.9800    | C(62)-C(63)  | 1.354(9)  |
| C(48)-H(48B)  | 0.9800    | C(62)-C(69)  | 1.507(10) |
| C(48)-H(48C)  | 0.9800    | C(62)-H(62A) | 1.0000    |
| C(49)-H(49A)  | 0.9800    | C(63)-C(64)  | 1.502(8)  |
| C(49)-H(49B)  | 0.9800    | C(63)-H(63A) | 1.0000    |
| C(49)-H(49C)  | 0.9800    | C(64)-C(65)  | 1.445(10) |
| C(50)-C(55)   | 1.391(7)  | C(64)-H(64A) | 0.9900    |
| C(50)-C(51)   | 1.402(7)  | C(64)-H(64B) | 0.9900    |
| C(51)-C(52)   | 1.406(7)  | C(65)-C(66)  | 1.549(10) |
| C(51)-C(56)   | 1.509(8)  | C(65)-H(65A) | 0.9900    |

Electronic Supplementary Information for Dalton Transactions  
This journal is © The Royal Society of Chemistry 2007

|                  |           |                   |            |
|------------------|-----------|-------------------|------------|
| C(65)-H(65B)     | 0.9900    | N(3)-Rh(1)-C(19)  | 166.6(2)   |
| C(66)-C(67)      | 1.312(11) | C(20)-Rh(1)-C(19) | 37.4(3)    |
| C(66)-H(66A)     | 1.0000    | C(1)-Rh(1)-C(23)  | 150.0(2)   |
| C(67)-C(68)      | 1.506(12) | N(3)-Rh(1)-C(23)  | 87.5(2)    |
| C(67)-H(67A)     | 1.0000    | C(20)-Rh(1)-C(23) | 82.0(2)    |
| C(68)-C(69)      | 1.419(11) | C(19)-Rh(1)-C(23) | 97.5(3)    |
| C(68)-H(68A)     | 0.9900    | C(1)-Rh(1)-C(24)  | 173.0(2)   |
| C(68)-H(68B)     | 0.9900    | N(3)-Rh(1)-C(24)  | 94.62(18)  |
| C(69)-H(69A)     | 0.9900    | C(20)-Rh(1)-C(24) | 89.8(2)    |
| C(69)-H(69B)     | 0.9900    | C(19)-Rh(1)-C(24) | 82.3(2)    |
| C(70)-C(71)      | 1.327(10) | C(23)-Rh(1)-C(24) | 36.8(2)    |
| C(70)-C(77)      | 1.475(11) | C(27)-Rh(2)-N(6)  | 86.38(16)  |
| C(70)-H(70A)     | 1.0000    | C(27)-Rh(2)-C(62) | 90.5(2)    |
| C(71)-C(72)      | 1.499(12) | N(6)-Rh(2)-C(62)  | 156.7(2)   |
| C(71)-H(71A)     | 1.0000    | C(27)-Rh(2)-C(63) | 97.39(19)  |
| C(72)-C(73)      | 1.361(13) | N(6)-Rh(2)-C(63)  | 166.00(19) |
| C(72)-H(72A)     | 0.9900    | C(62)-Rh(2)-C(63) | 37.2(2)    |
| C(72)-H(72B)     | 0.9900    | C(27)-Rh(2)-C(67) | 150.8(3)   |
| C(73)-C(74)      | 1.566(12) | N(6)-Rh(2)-C(67)  | 89.6(2)    |
| C(73)-H(73A)     | 0.9900    | C(62)-Rh(2)-C(67) | 81.9(3)    |
| C(73)-H(73B)     | 0.9900    | C(63)-Rh(2)-C(67) | 93.4(2)    |
| C(74)-C(75)      | 1.338(10) | C(27)-Rh(2)-C(66) | 174.0(3)   |
| C(74)-H(74A)     | 1.0000    | N(6)-Rh(2)-C(66)  | 93.06(17)  |
| C(75)-C(76)      | 1.547(10) | C(62)-Rh(2)-C(66) | 92.3(2)    |
| C(75)-H(75A)     | 1.0000    | C(63)-Rh(2)-C(66) | 81.8(2)    |
| C(76)-C(77)      | 1.392(11) | C(67)-Rh(2)-C(66) | 35.1(3)    |
| C(76)-H(76A)     | 0.9900    | C(37)-Rh(3)-C(74) | 92.3(2)    |
| C(76)-H(76B)     | 0.9900    | C(37)-Rh(3)-N(7)  | 85.44(17)  |
| C(77)-H(77A)     | 0.9900    | C(74)-Rh(3)-N(7)  | 154.6(3)   |
| C(77)-H(77B)     | 0.9900    | C(37)-Rh(3)-C(75) | 97.2(2)    |
|                  |           | C(74)-Rh(3)-C(75) | 36.8(3)    |
| C(1)-Rh(1)-N(3)  | 85.36(17) | N(7)-Rh(3)-C(75)  | 168.5(3)   |
| C(1)-Rh(1)-C(20) | 93.0(2)   | C(37)-Rh(3)-C(71) | 154.5(2)   |
| N(3)-Rh(1)-C(20) | 156.0(2)  | C(74)-Rh(3)-C(71) | 82.8(3)    |
| C(1)-Rh(1)-C(19) | 96.1(2)   | N(7)-Rh(3)-C(71)  | 88.4(2)    |



Electronic Supplementary Information for Dalton Transactions  
 This journal is © The Royal Society of Chemistry 2007

|                   |           |                   |            |
|-------------------|-----------|-------------------|------------|
| C(75)-Rh(3)-C(71) | 93.8(3)   | F(9)-P(2)-F(8)    | 89.7(2)    |
| C(37)-Rh(3)-C(70) | 170.1(3)  | C(1)-N(1)-C(2)    | 110.5(4)   |
| C(74)-Rh(3)-C(70) | 91.2(2)   | C(1)-N(1)-C(4)    | 127.3(4)   |
| N(7)-Rh(3)-C(70)  | 95.32(19) | C(2)-N(1)-C(4)    | 122.1(4)   |
| C(75)-Rh(3)-C(70) | 80.2(2)   | C(1)-N(2)-C(3)    | 113.9(5)   |
| C(71)-Rh(3)-C(70) | 35.3(3)   | C(1)-N(2)-C(16)   | 123.6(5)   |
| F(2)-P(1)-F(6)    | 90.4(3)   | C(3)-N(2)-C(16)   | 122.4(5)   |
| F(2)-P(1)-F(1)    | 92.5(3)   | C(17)-N(3)-N(3)#1 | 107.6(3)   |
| F(6)-P(1)-F(1)    | 88.3(2)   | C(17)-N(3)-Rh(1)  | 118.9(3)   |
| F(2)-P(1)-F(5)    | 88.9(3)   | N(3)#1-N(3)-Rh(1) | 132.05(14) |
| F(6)-P(1)-F(5)    | 179.3(3)  | C(27)-N(4)-C(28)  | 111.3(4)   |
| F(1)-P(1)-F(5)    | 91.8(2)   | C(27)-N(4)-C(38)  | 126.9(4)   |
| F(2)-P(1)-F(3)    | 91.8(3)   | C(28)-N(4)-C(38)  | 121.6(4)   |
| F(6)-P(1)-F(3)    | 91.6(2)   | C(27)-N(5)-C(29)  | 112.1(4)   |
| F(1)-P(1)-F(3)    | 175.7(3)  | C(27)-N(5)-C(30)  | 124.0(4)   |
| F(5)-P(1)-F(3)    | 88.4(2)   | C(29)-N(5)-C(30)  | 123.6(4)   |
| F(2)-P(1)-F(4)    | 178.0(3)  | C(31)-N(6)-N(7)   | 107.6(4)   |
| F(6)-P(1)-F(4)    | 88.6(2)   | C(31)-N(6)-Rh(2)  | 119.2(3)   |
| F(1)-P(1)-F(4)    | 89.3(3)   | N(7)-N(6)-Rh(2)   | 130.6(3)   |
| F(5)-P(1)-F(4)    | 92.1(3)   | C(33)-N(7)-N(6)   | 107.6(4)   |
| F(3)-P(1)-F(4)    | 86.4(3)   | C(33)-N(7)-Rh(3)  | 119.2(3)   |
| F(11)-P(2)-F(12)  | 90.1(2)   | N(6)-N(7)-Rh(3)   | 129.9(3)   |
| F(11)-P(2)-F(7)   | 90.0(2)   | C(37)-N(8)-C(35)  | 112.9(4)   |
| F(12)-P(2)-F(7)   | 179.9(3)  | C(37)-N(8)-C(34)  | 123.5(4)   |
| F(11)-P(2)-F(10)  | 89.8(2)   | C(35)-N(8)-C(34)  | 123.4(4)   |
| F(12)-P(2)-F(10)  | 90.0(2)   | C(37)-N(9)-C(36)  | 110.6(4)   |
| F(7)-P(2)-F(10)   | 90.0(2)   | C(37)-N(9)-C(50)  | 127.2(4)   |
| F(11)-P(2)-F(9)   | 179.6(4)  | C(36)-N(9)-C(50)  | 122.0(4)   |
| F(12)-P(2)-F(9)   | 89.9(2)   | N(2)-C(1)-N(1)    | 103.6(4)   |
| F(7)-P(2)-F(9)    | 89.9(2)   | N(2)-C(1)-Rh(1)   | 118.2(3)   |
| F(10)-P(2)-F(9)   | 89.8(2)   | N(1)-C(1)-Rh(1)   | 138.2(4)   |
| F(11)-P(2)-F(8)   | 90.6(4)   | C(3)-C(2)-N(1)    | 107.6(5)   |
| F(12)-P(2)-F(8)   | 90.0(2)   | C(3)-C(2)-H(2A)   | 126.2      |
| F(7)-P(2)-F(8)    | 90.0(2)   | N(1)-C(2)-H(2A)   | 126.2      |
| F(10)-P(2)-F(8)   | 179.6(4)  | C(2)-C(3)-N(2)    | 104.3(5)   |

Electronic Supplementary Information for Dalton Transactions  
This journal is © The Royal Society of Chemistry 2007

|                     |          |                      |          |
|---------------------|----------|----------------------|----------|
| C(2)-C(3)-H(3A)     | 127.8    | C(10)-C(12)-H(12C)   | 109.5    |
| N(2)-C(3)-H(3A)     | 127.8    | H(12A)-C(12)-H(12C)  | 109.5    |
| C(9)-C(4)-C(5)      | 122.0(6) | H(12B)-C(12)-H(12C)  | 109.5    |
| C(9)-C(4)-N(1)      | 119.9(5) | H(11D)-C(11')-H(11E) | 109.5    |
| C(5)-C(4)-N(1)      | 118.1(5) | H(11D)-C(11')-H(11F) | 109.5    |
| C(4)-C(5)-C(6)      | 116.9(7) | H(11E)-C(11')-H(11F) | 109.5    |
| C(4)-C(5)-C(10)     | 121.5(6) | H(12D)-C(12')-H(12E) | 109.5    |
| C(6)-C(5)-C(10)     | 121.4(6) | H(12D)-C(12')-H(12F) | 109.5    |
| C(7)-C(6)-C(5)      | 122.4(7) | H(12E)-C(12')-H(12F) | 109.5    |
| C(7)-C(6)-H(6A)     | 118.8    | C(14)-C(13)-C(9)     | 115.9(8) |
| C(5)-C(6)-H(6A)     | 118.8    | C(14)-C(13)-C(15)    | 109.9(7) |
| C(6)-C(7)-C(8)      | 119.4(8) | C(9)-C(13)-C(15)     | 110.2(5) |
| C(6)-C(7)-H(7A)     | 120.3    | C(14)-C(13)-H(13A)   | 106.8    |
| C(8)-C(7)-H(7A)     | 120.3    | C(9)-C(13)-H(13A)    | 106.8    |
| C(9)-C(8)-C(7)      | 121.9(7) | C(15)-C(13)-H(13A)   | 106.8    |
| C(9)-C(8)-H(8A)     | 119.0    | C(13)-C(14)-H(14A)   | 109.5    |
| C(7)-C(8)-H(8A)     | 119.0    | C(13)-C(14)-H(14B)   | 109.5    |
| C(8)-C(9)-C(4)      | 117.1(6) | H(14A)-C(14)-H(14B)  | 109.5    |
| C(8)-C(9)-C(13)     | 120.2(6) | C(13)-C(14)-H(14C)   | 109.5    |
| C(4)-C(9)-C(13)     | 122.7(5) | H(14A)-C(14)-H(14C)  | 109.5    |
| C(11)-C(10)-C(12)   | 104.5(8) | H(14B)-C(14)-H(14C)  | 109.5    |
| C(11)-C(10)-C(5)    | 118.9(8) | C(13)-C(15)-H(15A)   | 109.5    |
| C(12)-C(10)-C(5)    | 109.8(7) | C(13)-C(15)-H(15B)   | 109.5    |
| C(11)-C(10)-H(10)   | 107.8    | H(15A)-C(15)-H(15B)  | 109.5    |
| C(12)-C(10)-H(10)   | 107.8    | C(13)-C(15)-H(15C)   | 109.5    |
| C(5)-C(10)-H(10)    | 107.8    | H(15A)-C(15)-H(15C)  | 109.5    |
| C(10)-C(11)-H(11A)  | 109.5    | H(15B)-C(15)-H(15C)  | 109.5    |
| C(10)-C(11)-H(11B)  | 109.5    | N(2)-C(16)-C(17)     | 110.1(5) |
| H(11A)-C(11)-H(11B) | 109.5    | N(2)-C(16)-H(16A)    | 109.6    |
| C(10)-C(11)-H(11C)  | 109.5    | C(17)-C(16)-H(16A)   | 109.6    |
| H(11A)-C(11)-H(11C) | 109.5    | N(2)-C(16)-H(16B)    | 109.6    |
| H(11B)-C(11)-H(11C) | 109.5    | C(17)-C(16)-H(16B)   | 109.6    |
| C(10)-C(12)-H(12A)  | 109.5    | H(16A)-C(16)-H(16B)  | 108.2    |
| C(10)-C(12)-H(12B)  | 109.5    | N(3)-C(17)-C(18)     | 110.6(5) |
| H(12A)-C(12)-H(12B) | 109.5    | N(3)-C(17)-C(16)     | 120.9(5) |

Electronic Supplementary Information for Dalton Transactions  
This journal is © The Royal Society of Chemistry 2007

|                      |          |                     |          |
|----------------------|----------|---------------------|----------|
| C(18)-C(17)-C(16)    | 128.4(5) | C(23)-C(24)-Rh(1)   | 70.1(3)  |
| C(17)#1-C(18)-C(17)  | 103.5(6) | C(25)-C(24)-Rh(1)   | 111.3(4) |
| C(17)#1-C(18)-H(18A) | 128.2    | C(23)-C(24)-H(24A)  | 113.8    |
| C(17)-C(18)-H(18A)   | 128.2    | C(25)-C(24)-H(24A)  | 113.8    |
| C(20)-C(19)-C(26)    | 126.5(7) | Rh(1)-C(24)-H(24A)  | 113.8    |
| C(20)-C(19)-Rh(1)    | 71.1(4)  | C(24)-C(25)-C(26)   | 114.1(6) |
| C(26)-C(19)-Rh(1)    | 109.0(5) | C(24)-C(25)-H(25A)  | 108.7    |
| C(20)-C(19)-H(19A)   | 113.9    | C(26)-C(25)-H(25A)  | 108.7    |
| C(26)-C(19)-H(19A)   | 113.9    | C(24)-C(25)-H(25B)  | 108.7    |
| Rh(1)-C(19)-H(19A)   | 113.9    | C(26)-C(25)-H(25B)  | 108.7    |
| C(19)-C(20)-C(21)    | 124.5(6) | H(25A)-C(25)-H(25B) | 107.6    |
| C(19)-C(20)-Rh(1)    | 71.5(3)  | C(19)-C(26)-C(25)   | 113.3(7) |
| C(21)-C(20)-Rh(1)    | 112.8(4) | C(19)-C(26)-H(26A)  | 108.9    |
| C(19)-C(20)-H(20A)   | 113.6    | C(25)-C(26)-H(26A)  | 108.9    |
| C(21)-C(20)-H(20A)   | 113.6    | C(19)-C(26)-H(26B)  | 108.9    |
| Rh(1)-C(20)-H(20A)   | 113.6    | C(25)-C(26)-H(26B)  | 108.9    |
| C(22)-C(21)-C(20)    | 111.4(6) | H(26A)-C(26)-H(26B) | 107.7    |
| C(22)-C(21)-H(21A)   | 109.4    | N(4)-C(27)-N(5)     | 103.7(4) |
| C(20)-C(21)-H(21A)   | 109.4    | N(4)-C(27)-Rh(2)    | 138.2(4) |
| C(22)-C(21)-H(21B)   | 109.4    | N(5)-C(27)-Rh(2)    | 118.0(3) |
| C(20)-C(21)-H(21B)   | 109.4    | C(29)-C(28)-N(4)    | 106.5(4) |
| H(21A)-C(21)-H(21B)  | 108.0    | C(29)-C(28)-H(28A)  | 126.8    |
| C(23)-C(22)-C(21)    | 116.7(7) | N(4)-C(28)-H(28A)   | 126.8    |
| C(23)-C(22)-H(22A)   | 108.1    | C(28)-C(29)-N(5)    | 106.3(4) |
| C(21)-C(22)-H(22A)   | 108.1    | C(28)-C(29)-H(29A)  | 126.8    |
| C(23)-C(22)-H(22B)   | 108.1    | N(5)-C(29)-H(29A)   | 126.8    |
| C(21)-C(22)-H(22B)   | 108.1    | N(5)-C(30)-C(31)    | 112.3(4) |
| H(22A)-C(22)-H(22B)  | 107.3    | N(5)-C(30)-H(30A)   | 109.1    |
| C(24)-C(23)-C(22)    | 124.0(7) | C(31)-C(30)-H(30A)  | 109.1    |
| C(24)-C(23)-Rh(1)    | 73.0(3)  | N(5)-C(30)-H(30B)   | 109.1    |
| C(22)-C(23)-Rh(1)    | 109.3(4) | C(31)-C(30)-H(30B)  | 109.1    |
| C(24)-C(23)-H(23A)   | 114.3    | H(30A)-C(30)-H(30B) | 107.9    |
| C(22)-C(23)-H(23A)   | 114.3    | C(32)-C(31)-N(6)    | 110.5(4) |
| Rh(1)-C(23)-H(23A)   | 114.3    | C(32)-C(31)-C(30)   | 128.7(4) |
| C(23)-C(24)-C(25)    | 125.9(6) | N(6)-C(31)-C(30)    | 120.7(4) |

Electronic Supplementary Information for Dalton Transactions  
This journal is © The Royal Society of Chemistry 2007

|                     |          |                      |           |
|---------------------|----------|----------------------|-----------|
| C(31)-C(32)-C(33)   | 105.0(4) | C(43)-C(42)-H(42A)   | 120.0     |
| C(31)-C(32)-H(32A)  | 127.5    | C(38)-C(43)-C(42)    | 117.7(5)  |
| C(33)-C(32)-H(32A)  | 127.5    | C(38)-C(43)-C(47)    | 124.8(5)  |
| N(7)-C(33)-C(32)    | 109.3(4) | C(42)-C(43)-C(47)    | 117.5(5)  |
| N(7)-C(33)-C(34)    | 121.9(5) | C(39)-C(44)-C(45)    | 101.9(15) |
| C(32)-C(33)-C(34)   | 128.6(4) | C(39)-C(44)-C(46)    | 97.2(15)  |
| N(8)-C(34)-C(33)    | 112.4(4) | C(45)-C(44)-C(46)    | 115.1(10) |
| N(8)-C(34)-H(34A)   | 109.1    | C(39)-C(44)-H(44)    | 113.6     |
| C(33)-C(34)-H(34A)  | 109.1    | C(45)-C(44)-H(44)    | 113.6     |
| N(8)-C(34)-H(34B)   | 109.1    | C(46)-C(44)-H(44)    | 113.6     |
| C(33)-C(34)-H(34B)  | 109.1    | C(44)-C(45)-H(45A)   | 109.5     |
| H(34A)-C(34)-H(34B) | 107.9    | C(44)-C(45)-H(45B)   | 109.5     |
| C(36)-C(35)-N(8)    | 105.0(4) | H(45A)-C(45)-H(45B)  | 109.5     |
| C(36)-C(35)-H(35A)  | 127.5    | C(44)-C(45)-H(45C)   | 109.5     |
| N(8)-C(35)-H(35A)   | 127.5    | H(45A)-C(45)-H(45C)  | 109.5     |
| C(35)-C(36)-N(9)    | 108.1(4) | H(45B)-C(45)-H(45C)  | 109.5     |
| C(35)-C(36)-H(36A)  | 126.0    | C(44)-C(46)-H(46A)   | 109.5     |
| N(9)-C(36)-H(36A)   | 126.0    | C(44)-C(46)-H(46B)   | 109.5     |
| N(8)-C(37)-N(9)     | 103.4(4) | H(46A)-C(46)-H(46B)  | 109.5     |
| N(8)-C(37)-Rh(3)    | 120.0(3) | C(44)-C(46)-H(46C)   | 109.5     |
| N(9)-C(37)-Rh(3)    | 136.5(3) | H(46A)-C(46)-H(46C)  | 109.5     |
| C(43)-C(38)-C(39)   | 123.1(5) | H(46B)-C(46)-H(46C)  | 109.5     |
| C(43)-C(38)-N(4)    | 117.5(5) | H(45D)-C(45')-H(45E) | 109.5     |
| C(39)-C(38)-N(4)    | 119.3(5) | H(45D)-C(45')-H(45F) | 109.5     |
| C(40)-C(39)-C(38)   | 116.5(6) | H(45E)-C(45')-H(45F) | 109.5     |
| C(40)-C(39)-C(44)   | 122.0(6) | H(46D)-C(46')-H(46E) | 109.5     |
| C(38)-C(39)-C(44)   | 121.4(6) | H(46D)-C(46')-H(46F) | 109.5     |
| C(41)-C(40)-C(39)   | 121.1(6) | H(46E)-C(46')-H(46F) | 109.5     |
| C(41)-C(40)-H(40A)  | 119.5    | C(49)-C(47)-C(43)    | 114.5(5)  |
| C(39)-C(40)-H(40A)  | 119.5    | C(49)-C(47)-C(48)    | 109.8(5)  |
| C(42)-C(41)-C(40)   | 121.7(6) | C(43)-C(47)-C(48)    | 109.8(5)  |
| C(42)-C(41)-H(41A)  | 119.2    | C(49)-C(47)-H(47A)   | 107.5     |
| C(40)-C(41)-H(41A)  | 119.2    | C(43)-C(47)-H(47A)   | 107.5     |
| C(41)-C(42)-C(43)   | 119.9(6) | C(48)-C(47)-H(47A)   | 107.5     |
| C(41)-C(42)-H(42A)  | 120.0    | C(47)-C(48)-H(48A)   | 109.5     |

Electronic Supplementary Information for Dalton Transactions  
This journal is © The Royal Society of Chemistry 2007

|                     |          |                     |          |
|---------------------|----------|---------------------|----------|
| C(47)-C(48)-H(48B)  | 109.5    | C(56)-C(57)-H(57A)  | 109.5    |
| H(48A)-C(48)-H(48B) | 109.5    | C(56)-C(57)-H(57B)  | 109.5    |
| C(47)-C(48)-H(48C)  | 109.5    | H(57A)-C(57)-H(57B) | 109.5    |
| H(48A)-C(48)-H(48C) | 109.5    | C(56)-C(57)-H(57C)  | 109.5    |
| H(48B)-C(48)-H(48C) | 109.5    | H(57A)-C(57)-H(57C) | 109.5    |
| C(47)-C(49)-H(49A)  | 109.5    | H(57B)-C(57)-H(57C) | 109.5    |
| C(47)-C(49)-H(49B)  | 109.5    | C(56)-C(58)-H(58A)  | 109.5    |
| H(49A)-C(49)-H(49B) | 109.5    | C(56)-C(58)-H(58B)  | 109.5    |
| C(47)-C(49)-H(49C)  | 109.5    | H(58A)-C(58)-H(58B) | 109.5    |
| H(49A)-C(49)-H(49C) | 109.5    | C(56)-C(58)-H(58C)  | 109.5    |
| H(49B)-C(49)-H(49C) | 109.5    | H(58A)-C(58)-H(58C) | 109.5    |
| C(55)-C(50)-C(51)   | 123.7(5) | H(58B)-C(58)-H(58C) | 109.5    |
| C(55)-C(50)-N(9)    | 119.1(4) | C(60)-C(59)-C(55)   | 112.8(6) |
| C(51)-C(50)-N(9)    | 117.2(4) | C(60)-C(59)-C(61)   | 114.1(6) |
| C(50)-C(51)-C(52)   | 116.8(5) | C(55)-C(59)-C(61)   | 109.2(5) |
| C(50)-C(51)-C(56)   | 122.5(4) | C(60)-C(59)-H(59A)  | 106.7    |
| C(52)-C(51)-C(56)   | 120.7(5) | C(55)-C(59)-H(59A)  | 106.7    |
| C(53)-C(52)-C(51)   | 121.2(5) | C(61)-C(59)-H(59A)  | 106.7    |
| C(53)-C(52)-H(52A)  | 119.4    | C(59)-C(60)-H(60A)  | 109.5    |
| C(51)-C(52)-H(52A)  | 119.4    | C(59)-C(60)-H(60B)  | 109.5    |
| C(52)-C(53)-C(54)   | 121.1(5) | H(60A)-C(60)-H(60B) | 109.5    |
| C(52)-C(53)-H(53A)  | 119.4    | C(59)-C(60)-H(60C)  | 109.5    |
| C(54)-C(53)-H(53A)  | 119.4    | H(60A)-C(60)-H(60C) | 109.5    |
| C(55)-C(54)-C(53)   | 120.4(6) | H(60B)-C(60)-H(60C) | 109.5    |
| C(55)-C(54)-H(54A)  | 119.8    | C(59)-C(61)-H(61A)  | 109.5    |
| C(53)-C(54)-H(54A)  | 119.8    | C(59)-C(61)-H(61B)  | 109.5    |
| C(50)-C(55)-C(54)   | 116.7(5) | H(61A)-C(61)-H(61B) | 109.5    |
| C(50)-C(55)-C(59)   | 123.1(5) | C(59)-C(61)-H(61C)  | 109.5    |
| C(54)-C(55)-C(59)   | 120.2(5) | H(61A)-C(61)-H(61C) | 109.5    |
| C(51)-C(56)-C(58)   | 113.6(5) | H(61B)-C(61)-H(61C) | 109.5    |
| C(51)-C(56)-C(57)   | 112.3(6) | C(63)-C(62)-C(69)   | 124.7(6) |
| C(58)-C(56)-C(57)   | 106.8(5) | C(63)-C(62)-Rh(2)   | 71.9(3)  |
| C(51)-C(56)-H(56A)  | 108.0    | C(69)-C(62)-Rh(2)   | 111.2(5) |
| C(58)-C(56)-H(56A)  | 108.0    | C(63)-C(62)-H(62A)  | 113.9    |
| C(57)-C(56)-H(56A)  | 108.0    | C(69)-C(62)-H(62A)  | 113.9    |

Electronic Supplementary Information for Dalton Transactions  
This journal is © The Royal Society of Chemistry 2007

|                     |          |                     |          |
|---------------------|----------|---------------------|----------|
| Rh(2)-C(62)-H(62A)  | 113.9    | C(67)-C(68)-H(68B)  | 107.8    |
| C(62)-C(63)-C(64)   | 125.5(5) | H(68A)-C(68)-H(68B) | 107.2    |
| C(62)-C(63)-Rh(2)   | 70.9(3)  | C(68)-C(69)-C(62)   | 116.9(7) |
| C(64)-C(63)-Rh(2)   | 112.1(4) | C(68)-C(69)-H(69A)  | 108.1    |
| C(62)-C(63)-H(63A)  | 113.5    | C(62)-C(69)-H(69A)  | 108.1    |
| C(64)-C(63)-H(63A)  | 113.5    | C(68)-C(69)-H(69B)  | 108.1    |
| Rh(2)-C(63)-H(63A)  | 113.5    | C(62)-C(69)-H(69B)  | 108.1    |
| C(65)-C(64)-C(63)   | 116.7(6) | H(69A)-C(69)-H(69B) | 107.3    |
| C(65)-C(64)-H(64A)  | 108.1    | C(71)-C(70)-C(77)   | 123.2(7) |
| C(63)-C(64)-H(64A)  | 108.1    | C(71)-C(70)-Rh(3)   | 71.0(4)  |
| C(65)-C(64)-H(64B)  | 108.1    | C(77)-C(70)-Rh(3)   | 110.1(5) |
| C(63)-C(64)-H(64B)  | 108.1    | C(71)-C(70)-H(70A)  | 114.8    |
| H(64A)-C(64)-H(64B) | 107.3    | C(77)-C(70)-H(70A)  | 114.8    |
| C(64)-C(65)-C(66)   | 117.0(6) | Rh(3)-C(70)-H(70A)  | 114.8    |
| C(64)-C(65)-H(65A)  | 108.0    | C(70)-C(71)-C(72)   | 127.5(8) |
| C(66)-C(65)-H(65A)  | 108.0    | C(70)-C(71)-Rh(3)   | 73.7(4)  |
| C(64)-C(65)-H(65B)  | 108.0    | C(72)-C(71)-Rh(3)   | 107.0(5) |
| C(66)-C(65)-H(65B)  | 108.0    | C(70)-C(71)-H(71A)  | 113.5    |
| H(65A)-C(65)-H(65B) | 107.3    | C(72)-C(71)-H(71A)  | 113.5    |
| C(67)-C(66)-C(65)   | 125.0(7) | Rh(3)-C(71)-H(71A)  | 113.5    |
| C(67)-C(66)-Rh(2)   | 71.4(4)  | C(73)-C(72)-C(71)   | 116.5(9) |
| C(65)-C(66)-Rh(2)   | 109.0(4) | C(73)-C(72)-H(72A)  | 108.2    |
| C(67)-C(66)-H(66A)  | 114.3    | C(71)-C(72)-H(72A)  | 108.2    |
| C(65)-C(66)-H(66A)  | 114.3    | C(73)-C(72)-H(72B)  | 108.2    |
| Rh(2)-C(66)-H(66A)  | 114.3    | C(71)-C(72)-H(72B)  | 108.2    |
| C(66)-C(67)-C(68)   | 124.3(7) | H(72A)-C(72)-H(72B) | 107.3    |
| C(66)-C(67)-Rh(2)   | 73.5(4)  | C(72)-C(73)-C(74)   | 119.1(9) |
| C(68)-C(67)-Rh(2)   | 109.0(5) | C(72)-C(73)-H(73A)  | 107.5    |
| C(66)-C(67)-H(67A)  | 114.2    | C(74)-C(73)-H(73A)  | 107.5    |
| C(68)-C(67)-H(67A)  | 114.2    | C(72)-C(73)-H(73B)  | 107.5    |
| Rh(2)-C(67)-H(67A)  | 114.2    | C(74)-C(73)-H(73B)  | 107.5    |
| C(69)-C(68)-C(67)   | 117.9(7) | H(73A)-C(73)-H(73B) | 107.0    |
| C(69)-C(68)-H(68A)  | 107.8    | C(75)-C(74)-C(73)   | 123.6(7) |
| C(67)-C(68)-H(68A)  | 107.8    | C(75)-C(74)-Rh(3)   | 73.5(4)  |
| C(69)-C(68)-H(68B)  | 107.8    | C(73)-C(74)-Rh(3)   | 107.7(5) |

Electronic Supplementary Information for Dalton Transactions  
This journal is © The Royal Society of Chemistry 2007

|                    |          |                     |          |
|--------------------|----------|---------------------|----------|
| C(75)-C(74)-H(74A) | 114.7    | C(75)-C(76)-H(76A)  | 108.7    |
| C(73)-C(74)-H(74A) | 114.7    | C(77)-C(76)-H(76B)  | 108.7    |
| Rh(3)-C(74)-H(74A) | 114.7    | C(75)-C(76)-H(76B)  | 108.7    |
| C(74)-C(75)-C(76)  | 127.1(6) | H(76A)-C(76)-H(76B) | 107.6    |
| C(74)-C(75)-Rh(3)  | 69.7(4)  | C(76)-C(77)-C(70)   | 119.8(7) |
| C(76)-C(75)-Rh(3)  | 110.5(4) | C(76)-C(77)-H(77A)  | 107.4    |
| C(74)-C(75)-H(75A) | 113.6    | C(70)-C(77)-H(77A)  | 107.4    |
| C(76)-C(75)-H(75A) | 113.6    | C(76)-C(77)-H(77B)  | 107.4    |
| Rh(3)-C(75)-H(75A) | 113.6    | C(70)-C(77)-H(77B)  | 107.4    |
| C(77)-C(76)-C(75)  | 114.0(6) | H(77A)-C(77)-H(77B) | 106.9    |
| C(77)-C(76)-H(76A) | 108.7    |                     |          |

---

Symmetry transformations used to generate equivalent atoms:  
#1 -x+1,y,-z+1

Table 4. Anisotropic displacement parameters ( $\text{\AA}^2 \times 10^3$ ). The anisotropic displacement factor exponent takes the form:  $-2\pi^2 [ h^2 a^{*2} U_{11} + \dots + 2 h k a^* b^* U_{12} ]$

|      | $U_{11}$ | $U_{22}$ | $U_{33}$ | $U_{23}$ | $U_{13}$ | $U_{12}$ |
|------|----------|----------|----------|----------|----------|----------|
| Rh1  | 31(1)    | 33(1)    | 33(1)    | -2(1)    | 1(1)     | -1(1)    |
| Rh2  | 28(1)    | 35(1)    | 29(1)    | 2(1)     | -3(1)    | 0(1)     |
| Rh3  | 34(1)    | 33(1)    | 33(1)    | 3(1)     | 2(1)     | -1(1)    |
| P1   | 38(1)    | 38(1)    | 39(1)    | -3(1)    | 2(1)     | 4(1)     |
| F1   | 99(3)    | 88(3)    | 123(4)   | -60(3)   | -54(3)   | 7(3)     |
| F2   | 129(4)   | 67(3)    | 127(4)   | 25(3)    | 78(3)    | 1(3)     |
| F3   | 71(2)    | 71(2)    | 69(2)    | -16(2)   | -30(2)   | 14(2)    |
| F4   | 117(3)   | 64(2)    | 70(3)    | 18(2)    | 30(2)    | 0(2)     |
| F5   | 43(2)    | 66(2)    | 110(3)   | -29(2)   | -13(2)   | 19(2)    |
| F6   | 67(2)    | 67(3)    | 82(3)    | -9(2)    | 10(2)    | 29(2)    |
| P2   | 63(2)    | 38(1)    | 33(2)    | 3(2)     | 9(2)     | -3(3)    |
| F7   | 77(3)    | 89(3)    | 45(3)    | -2(5)    | 17(3)    | 5(7)     |
| F8   | 84(7)    | 87(10)   | 73(7)    | -51(7)   | 6(5)     | -18(6)   |
| F9   | 124(11)  | 44(5)    | 93(9)    | 7(5)     | 36(8)    | 19(6)    |
| F10  | 81(8)    | 162(17)  | 58(7)    | -42(8)   | 8(5)     | -38(10)  |
| F11  | 105(11)  | 73(7)    | 72(7)    | 16(5)    | 4(6)     | 51(6)    |
| F12  | 77(3)    | 89(3)    | 45(3)    | -2(5)    | 17(3)    | 5(7)     |
| P2'  | 63(2)    | 38(1)    | 33(2)    | 3(2)     | 9(2)     | -3(3)    |
| F7'  | 77(3)    | 89(3)    | 45(3)    | -2(5)    | 17(3)    | 5(7)     |
| F8'  | 84(7)    | 87(10)   | 73(7)    | -51(7)   | 6(5)     | -18(6)   |
| F9'  | 124(11)  | 44(5)    | 93(9)    | 7(5)     | 36(8)    | 19(6)    |
| F10' | 81(8)    | 162(17)  | 58(7)    | -42(8)   | 8(5)     | -38(10)  |
| F11' | 105(11)  | 73(7)    | 72(7)    | 16(5)    | 4(6)     | 51(6)    |
| F12' | 77(3)    | 89(3)    | 45(3)    | -2(5)    | 17(3)    | 5(7)     |
| N1   | 35(2)    | 38(2)    | 35(2)    | -2(2)    | 0(2)     | -3(2)    |
| N2   | 61(3)    | 33(2)    | 32(2)    | -8(2)    | 3(2)     | -4(2)    |
| N3   | 41(2)    | 32(2)    | 32(2)    | -1(2)    | 2(2)     | 0(2)     |
| N4   | 37(2)    | 48(2)    | 29(2)    | -3(2)    | -3(2)    | 3(2)     |
| N5   | 37(2)    | 38(2)    | 36(2)    | -3(2)    | -3(2)    | -1(2)    |
| N6   | 28(2)    | 43(2)    | 31(2)    | -3(2)    | 0(1)     | -8(2)    |



Electronic Supplementary Information for Dalton Transactions  
This journal is © The Royal Society of Chemistry 2007

|      |        |         |        |        |        |        |
|------|--------|---------|--------|--------|--------|--------|
| N7   | 33(2)  | 42(2)   | 32(2)  | 0(2)   | -3(2)  | -4(2)  |
| N8   | 36(2)  | 47(3)   | 31(2)  | -2(2)  | 6(2)   | -5(2)  |
| N9   | 39(2)  | 44(2)   | 25(2)  | -1(2)  | -3(2)  | -3(2)  |
| C1   | 32(2)  | 33(2)   | 29(2)  | -3(2)  | -4(2)  | 2(2)   |
| C2   | 58(3)  | 54(4)   | 34(3)  | -4(2)  | -2(2)  | -17(3) |
| C3   | 67(4)  | 52(3)   | 45(3)  | -8(3)  | 11(3)  | -7(3)  |
| C4   | 48(3)  | 50(3)   | 37(3)  | 0(2)   | -8(2)  | 3(2)   |
| C5   | 61(4)  | 84(4)   | 49(3)  | 12(3)  | -4(3)  | 34(3)  |
| C6   | 107(6) | 98(6)   | 90(6)  | 26(5)  | 16(4)  | 76(5)  |
| C7   | 89(3)  | 81(3)   | 90(3)  | 5(2)   | 2(2)   | 11(2)  |
| C8   | 65(2)  | 62(2)   | 66(2)  | 5(2)   | -2(2)  | 1(2)   |
| C9   | 48(3)  | 53(3)   | 36(3)  | 12(2)  | -13(2) | 1(2)   |
| C10  | 76(2)  | 82(2)   | 77(2)  | 5(1)   | 4(1)   | 4(1)   |
| C11  | 93(3)  | 95(3)   | 94(3)  | -1(1)  | 5(1)   | 3(1)   |
| C12  | 80(3)  | 84(3)   | 82(3)  | 5(1)   | 3(1)   | 1(1)   |
| C10' | 76(2)  | 82(2)   | 77(2)  | 5(1)   | 4(1)   | 4(1)   |
| C11' | 93(3)  | 95(3)   | 94(3)  | -1(1)  | 5(1)   | 3(1)   |
| C12' | 80(3)  | 84(3)   | 82(3)  | 5(1)   | 3(1)   | 1(1)   |
| C13  | 31(3)  | 99(6)   | 49(3)  | 31(3)  | 2(2)   | 12(3)  |
| C14  | 90(7)  | 197(13) | 133(9) | 89(9)  | 47(6)  | -13(7) |
| C15  | 70(4)  | 83(5)   | 61(4)  | 2(3)   | 14(3)  | 15(4)  |
| C16  | 98(5)  | 44(3)   | 44(3)  | 12(3)  | 11(3)  | 27(3)  |
| C17  | 60(3)  | 31(3)   | 35(3)  | 0(2)   | 1(2)   | 9(2)   |
| C18  | 103(7) | 26(4)   | 38(4)  | 0      | 9(4)   | 0      |
| C19  | 80(4)  | 56(4)   | 53(3)  | 7(3)   | 11(3)  | -36(3) |
| C20  | 50(3)  | 98(5)   | 44(3)  | -18(3) | 16(2)  | -27(3) |
| C21  | 77(2)  | 93(3)   | 78(2)  | -2(2)  | 8(2)   | -4(2)  |
| C22  | 77(2)  | 96(3)   | 82(2)  | -3(2)  | 1(2)   | -3(2)  |
| C23  | 40(3)  | 97(4)   | 41(3)  | -15(3) | -10(2) | -16(3) |
| C24  | 57(3)  | 57(3)   | 39(3)  | -16(2) | 9(2)   | -20(3) |
| C25  | 76(2)  | 69(2)   | 68(2)  | -6(2)  | 8(2)   | -11(2) |
| C26  | 90(3)  | 74(2)   | 81(2)  | 2(2)   | 7(2)   | -8(2)  |
| C27  | 34(2)  | 33(2)   | 34(2)  | -4(2)  | 3(2)   | 4(2)   |
| C28  | 32(2)  | 63(3)   | 36(2)  | -1(2)  | -8(2)  | 6(2)   |
| C29  | 34(2)  | 63(4)   | 36(3)  | -9(2)  | -11(2) | 1(2)   |

Electronic Supplementary Information for Dalton Transactions  
This journal is © The Royal Society of Chemistry 2007

|      |        |        |       |        |        |        |
|------|--------|--------|-------|--------|--------|--------|
| C30  | 43(3)  | 51(3)  | 33(3) | -1(2)  | -5(2)  | -13(2) |
| C31  | 41(3)  | 33(2)  | 32(2) | -1(2)  | -5(2)  | -7(2)  |
| C32  | 26(2)  | 51(3)  | 38(3) | 1(2)   | -3(2)  | -14(2) |
| C33  | 31(2)  | 48(3)  | 37(2) | 8(2)   | 2(2)   | -3(2)  |
| C34  | 30(2)  | 71(4)  | 46(3) | -2(3)  | 6(2)   | -8(2)  |
| C35  | 39(3)  | 45(3)  | 44(3) | 2(2)   | 12(2)  | -6(2)  |
| C36  | 54(3)  | 37(2)  | 33(2) | 1(2)   | 6(2)   | -10(2) |
| C37  | 36(3)  | 31(2)  | 40(3) | 1(2)   | 4(2)   | -5(2)  |
| C38  | 41(3)  | 50(3)  | 28(2) | 2(2)   | -3(2)  | 2(2)   |
| C39  | 80(4)  | 37(3)  | 41(3) | 10(2)  | -7(3)  | 4(3)   |
| C40  | 114(6) | 48(4)  | 54(4) | 11(3)  | 5(4)   | -26(4) |
| C41  | 78(5)  | 63(4)  | 69(4) | 15(4)  | 9(4)   | -21(4) |
| C42  | 43(3)  | 74(4)  | 48(3) | 3(3)   | 12(2)  | -4(3)  |
| C43  | 47(3)  | 48(3)  | 32(2) | 5(2)   | 1(2)   | 0(2)   |
| C44  | 98(5)  | 28(3)  | 69(4) | 2(3)   | 14(3)  | 13(3)  |
| C45  | 96(4)  | 93(4)  | 96(4) | 3(2)   | 3(2)   | 6(2)   |
| C46  | 138(9) | 22(5)  | 50(4) | -7(4)  | 21(6)  | -5(5)  |
| C44' | 98(5)  | 28(3)  | 69(4) | 2(3)   | 14(3)  | 13(3)  |
| C45' | 96(4)  | 93(4)  | 96(4) | 3(2)   | 3(2)   | 6(2)   |
| C46' | 138(9) | 22(5)  | 50(4) | -7(4)  | 21(6)  | -5(5)  |
| C47  | 42(3)  | 54(3)  | 45(3) | -6(3)  | 6(2)   | -3(2)  |
| C48  | 74(4)  | 84(5)  | 45(3) | -24(3) | -8(3)  | 12(4)  |
| C49  | 79(5)  | 66(4)  | 71(4) | -8(4)  | -10(4) | 21(4)  |
| C50  | 39(3)  | 34(2)  | 32(2) | 6(2)   | -1(2)  | -4(2)  |
| C51  | 52(3)  | 32(3)  | 34(2) | -1(2)  | 3(2)   | -12(2) |
| C52  | 63(4)  | 46(3)  | 37(3) | -5(2)  | -6(2)  | -21(3) |
| C53  | 61(4)  | 63(4)  | 51(3) | -4(3)  | -9(3)  | -22(3) |
| C54  | 42(3)  | 67(4)  | 53(3) | 10(3)  | -4(2)  | -5(3)  |
| C55  | 51(3)  | 49(3)  | 35(3) | 2(2)   | -2(2)  | -3(2)  |
| C56  | 43(3)  | 49(3)  | 51(3) | -15(2) | 19(2)  | -15(2) |
| C57  | 121(7) | 67(4)  | 65(4) | -8(4)  | 33(4)  | -29(5) |
| C58  | 81(5)  | 49(4)  | 80(5) | -24(3) | 25(4)  | -15(3) |
| C59  | 46(3)  | 55(4)  | 54(3) | -10(3) | -7(2)  | 17(3)  |
| C60  | 61(4)  | 113(6) | 57(4) | -15(4) | -3(3)  | 28(4)  |
| C61  | 82(5)  | 49(4)  | 76(4) | -4(3)  | 8(4)   | 16(3)  |

Electronic Supplementary Information for Dalton Transactions  
This journal is © The Royal Society of Chemistry 2007

|     |        |        |        |       |        |        |
|-----|--------|--------|--------|-------|--------|--------|
| C62 | 45(3)  | 62(3)  | 58(3)  | -1(3) | 5(3)   | 29(3)  |
| C63 | 40(3)  | 62(3)  | 37(2)  | 3(2)  | -1(2)  | 2(2)   |
| C64 | 61(2)  | 71(2)  | 64(2)  | 7(2)  | -2(2)  | -7(2)  |
| C65 | 77(2)  | 96(3)  | 77(2)  | -7(2) | 4(2)   | -5(2)  |
| C66 | 33(2)  | 128(5) | 28(2)  | -4(3) | -9(2)  | 18(3)  |
| C67 | 60(4)  | 85(4)  | 58(4)  | 34(3) | -1(3)  | 18(3)  |
| C68 | 95(3)  | 92(3)  | 94(3)  | 9(2)  | 4(2)   | 12(2)  |
| C69 | 82(3)  | 74(2)  | 81(2)  | 4(2)  | 5(2)   | 13(2)  |
| C70 | 89(4)  | 54(4)  | 37(3)  | 4(3)  | 7(3)   | -27(3) |
| C71 | 91(4)  | 51(3)  | 57(4)  | 26(3) | -2(3)  | 5(3)   |
| C72 | 102(3) | 96(3)  | 101(3) | 4(2)  | 3(2)   | 7(2)   |
| C73 | 107(3) | 98(3)  | 104(3) | 1(2)  | 10(2)  | 11(2)  |
| C74 | 116(5) | 30(3)  | 65(4)  | -8(3) | 39(4)  | -1(3)  |
| C75 | 93(4)  | 46(3)  | 47(3)  | 15(3) | -12(3) | -35(3) |
| C76 | 73(2)  | 72(2)  | 69(2)  | 5(2)  | -2(2)  | -14(2) |
| C77 | 94(3)  | 95(3)  | 89(3)  | -4(2) | 7(2)   | -12(2) |

---

Table 5. Torsion angles [°].

|                 |           |               |           |
|-----------------|-----------|---------------|-----------|
| C1-Rh1-N3-C17   | -46.1(4)  | C70-Rh3-N7-N6 | 12.3(4)   |
| C20-Rh1-N3-C17  | 40.9(7)   | C3-N2-C1-N1   | -0.4(6)   |
| C19-Rh1-N3-C17  | -142.9(9) | C16-N2-C1-N1  | -178.6(5) |
| C23-Rh1-N3-C17  | 104.7(4)  | C3-N2-C1-Rh1  | 180.0(4)  |
| C24-Rh1-N3-C17  | 140.9(4)  | C16-N2-C1-Rh1 | 1.7(7)    |
| C1-Rh1-N3-N3#1  | 149.6(5)  | C2-N1-C1-N2   | 0.9(6)    |
| C20-Rh1-N3-N3#1 | -123.4(6) | C4-N1-C1-N2   | 177.1(5)  |
| C19-Rh1-N3-N3#1 | 52.7(12)  | C2-N1-C1-Rh1  | -179.6(4) |
| C23-Rh1-N3-N3#1 | -59.6(5)  | C4-N1-C1-Rh1  | -3.4(8)   |
| C24-Rh1-N3-N3#1 | -23.5(6)  | N3-Rh1-C1-N2  | 41.4(4)   |
| C27-Rh2-N6-C31  | 46.6(4)   | C20-Rh1-C1-N2 | -114.7(4) |
| C62-Rh2-N6-C31  | -36.3(7)  | C19-Rh1-C1-N2 | -152.1(4) |
| C63-Rh2-N6-C31  | 152.8(7)  | C23-Rh1-C1-N2 | -35.4(7)  |
| C67-Rh2-N6-C31  | -104.5(4) | C24-Rh1-C1-N2 | 131.5(16) |
| C66-Rh2-N6-C31  | -139.4(4) | N3-Rh1-C1-N1  | -138.1(5) |
| C27-Rh2-N6-N7   | -154.3(4) | C20-Rh1-C1-N1 | 65.8(6)   |
| C62-Rh2-N6-N7   | 122.8(6)  | C19-Rh1-C1-N1 | 28.4(6)   |
| C63-Rh2-N6-N7   | -48.2(9)  | C23-Rh1-C1-N1 | 145.1(5)  |
| C67-Rh2-N6-N7   | 54.6(5)   | C24-Rh1-C1-N1 | -48(2)    |
| C66-Rh2-N6-N7   | 19.7(5)   | C1-N1-C2-C3   | -1.1(6)   |
| C31-N6-N7-C33   | -0.1(5)   | C4-N1-C2-C3   | -177.5(5) |
| Rh2-N6-N7-C33   | -161.0(4) | N1-C2-C3-N2   | 0.8(6)    |
| C31-N6-N7-Rh3   | -159.0(3) | C1-N2-C3-C2   | -0.3(7)   |
| Rh2-N6-N7-Rh3   | 40.1(6)   | C16-N2-C3-C2  | 178.0(5)  |
| C37-Rh3-N7-C33  | 45.3(4)   | C1-N1-C4-C9   | -100.4(6) |
| C74-Rh3-N7-C33  | -40.5(7)  | C2-N1-C4-C9   | 75.4(7)   |
| C75-Rh3-N7-C33  | 149.1(9)  | C1-N1-C4-C5   | 80.6(7)   |
| C71-Rh3-N7-C33  | -109.9(4) | C2-N1-C4-C5   | -103.6(6) |
| C70-Rh3-N7-C33  | -144.5(4) | C9-C4-C5-C6   | 0.7(10)   |
| C37-Rh3-N7-N6   | -157.9(4) | N1-C4-C5-C6   | 179.7(7)  |
| C74-Rh3-N7-N6   | 116.3(6)  | C9-C4-C5-C10  | -174.3(5) |
| C75-Rh3-N7-N6   | -54.1(11) | N1-C4-C5-C10  | 4.7(9)    |
| C71-Rh3-N7-N6   | 46.9(4)   | C4-C5-C6-C7   | 3.9(13)   |

Electronic Supplementary Information for Dalton Transactions  
This journal is © The Royal Society of Chemistry 2007

|                   |           |                 |            |
|-------------------|-----------|-----------------|------------|
| C10-C5-C6-C7      | 178.8(8)  | C24-Rh1-C19-C26 | 23.3(5)    |
| C5-C6-C7-C8       | -7.1(15)  | C26-C19-C20-C21 | 5.4(10)    |
| C6-C7-C8-C9       | 5.8(13)   | Rh1-C19-C20-C21 | 105.4(6)   |
| C7-C8-C9-C4       | -1.4(10)  | C26-C19-C20-Rh1 | -100.0(6)  |
| C7-C8-C9-C13      | 177.3(7)  | C1-Rh1-C20-C19  | -96.1(4)   |
| C5-C4-C9-C8       | -1.8(8)   | N3-Rh1-C20-C19  | 178.5(4)   |
| N1-C4-C9-C8       | 179.2(5)  | C23-Rh1-C20-C19 | 113.7(4)   |
| C5-C4-C9-C13      | 179.6(6)  | C24-Rh1-C20-C19 | 77.6(4)    |
| N1-C4-C9-C13      | 0.6(8)    | C1-Rh1-C20-C21  | 143.4(5)   |
| C4-C5-C10-C11     | -163.5(8) | N3-Rh1-C20-C21  | 58.0(8)    |
| C6-C5-C10-C11     | 21.8(12)  | C19-Rh1-C20-C21 | -120.5(7)  |
| C4-C5-C10-C12     | 76.4(9)   | C23-Rh1-C20-C21 | -6.8(6)    |
| C6-C5-C10-C12     | -98.4(10) | C24-Rh1-C20-C21 | -43.0(6)   |
| C8-C9-C13-C14     | -45.3(8)  | C19-C20-C21-C22 | -90.3(9)   |
| C4-C9-C13-C14     | 133.3(7)  | Rh1-C20-C21-C22 | -7.7(9)    |
| C8-C9-C13-C15     | 80.3(8)   | C20-C21-C22-C23 | 26.6(10)   |
| C4-C9-C13-C15     | -101.1(6) | C21-C22-C23-C24 | 50.4(10)   |
| C1-N2-C16-C17     | -55.7(8)  | C21-C22-C23-Rh1 | -31.8(9)   |
| C3-N2-C16-C17     | 126.2(6)  | C1-Rh1-C23-C24  | 177.4(4)   |
| N3#1-N3-C17-C18   | -0.6(6)   | N3-Rh1-C23-C24  | 101.1(4)   |
| Rh1-N3-C17-C18    | -168.5(3) | C20-Rh1-C23-C24 | -100.5(4)  |
| N3#1-N3-C17-C16   | 176.7(5)  | C19-Rh1-C23-C24 | -66.3(4)   |
| Rh1-N3-C17-C16    | 8.8(7)    | C1-Rh1-C23-C22  | -61.8(8)   |
| N2-C16-C17-N3     | 48.9(8)   | N3-Rh1-C23-C22  | -138.1(6)  |
| N2-C16-C17-C18    | -134.3(5) | C20-Rh1-C23-C22 | 20.3(6)    |
| N3-C17-C18-C17#1  | 0.2(2)    | C19-Rh1-C23-C22 | 54.5(6)    |
| C16-C17-C18-C17#1 | -176.8(7) | C24-Rh1-C23-C22 | 120.8(7)   |
| C1-Rh1-C19-C20    | 87.0(4)   | C22-C23-C24-C25 | 0.2(10)    |
| N3-Rh1-C19-C20    | -177.5(7) | Rh1-C23-C24-C25 | 102.4(6)   |
| C23-Rh1-C19-C20   | -66.2(4)  | C22-C23-C24-Rh1 | -102.2(6)  |
| C24-Rh1-C19-C20   | -99.8(4)  | C1-Rh1-C24-C23  | -169.1(16) |
| C1-Rh1-C19-C26    | -149.8(5) | N3-Rh1-C24-C23  | -79.5(4)   |
| N3-Rh1-C19-C26    | -54.3(12) | C20-Rh1-C24-C23 | 76.9(4)    |
| C20-Rh1-C19-C26   | 123.1(7)  | C19-Rh1-C24-C23 | 113.6(4)   |
| C23-Rh1-C19-C26   | 57.0(6)   | C1-Rh1-C24-C25  | 69.1(18)   |

Electronic Supplementary Information for Dalton Transactions  
This journal is © The Royal Society of Chemistry 2007

|                 |            |                 |            |
|-----------------|------------|-----------------|------------|
| N3-Rh1-C24-C25  | 158.6(5)   | Rh2-N6-C31-C32  | 163.8(3)   |
| C20-Rh1-C24-C25 | -45.0(5)   | N7-N6-C31-C30   | -176.4(4)  |
| C19-Rh1-C24-C25 | -8.2(5)    | Rh2-N6-C31-C30  | -12.9(6)   |
| C23-Rh1-C24-C25 | -121.9(6)  | N5-C30-C31-C32  | 139.8(5)   |
| C23-C24-C25-C26 | -89.1(8)   | N5-C30-C31-N6   | -44.1(6)   |
| Rh1-C24-C25-C26 | -8.8(8)    | N6-C31-C32-C33  | -0.4(6)    |
| C20-C19-C26-C25 | 45.0(10)   | C30-C31-C32-C33 | 176.0(5)   |
| Rh1-C19-C26-C25 | -35.1(8)   | N6-N7-C33-C32   | -0.1(6)    |
| C24-C25-C26-C19 | 29.4(10)   | Rh3-N7-C33-C32  | 161.4(3)   |
| C28-N4-C27-N5   | -0.7(5)    | N6-N7-C33-C34   | -174.9(5)  |
| C38-N4-C27-N5   | -176.2(4)  | Rh3-N7-C33-C34  | -13.4(7)   |
| C28-N4-C27-Rh2  | 179.8(4)   | C31-C32-C33-N7  | 0.3(6)     |
| C38-N4-C27-Rh2  | 4.2(8)     | C31-C32-C33-C34 | 174.6(6)   |
| C29-N5-C27-N4   | 1.4(5)     | C37-N8-C34-C33  | 55.1(7)    |
| C30-N5-C27-N4   | 175.1(4)   | C35-N8-C34-C33  | -129.4(5)  |
| C29-N5-C27-Rh2  | -179.0(3)  | N7-C33-C34-N8   | -42.7(7)   |
| C30-N5-C27-Rh2  | -5.3(6)    | C32-C33-C34-N8  | 143.6(5)   |
| N6-Rh2-C27-N4   | 142.3(5)   | C37-N8-C35-C36  | -0.1(6)    |
| C62-Rh2-C27-N4  | -60.8(5)   | C34-N8-C35-C36  | -176.0(5)  |
| C63-Rh2-C27-N4  | -24.2(6)   | N8-C35-C36-N9   | -0.1(6)    |
| C67-Rh2-C27-N4  | -135.0(6)  | C37-N9-C36-C35  | 0.2(6)     |
| C66-Rh2-C27-N4  | 58(2)      | C50-N9-C36-C35  | 175.6(5)   |
| N6-Rh2-C27-N5   | -37.2(4)   | C35-N8-C37-N9   | 0.2(5)     |
| C62-Rh2-C27-N5  | 119.7(4)   | C34-N8-C37-N9   | 176.1(4)   |
| C63-Rh2-C27-N5  | 156.4(4)   | C35-N8-C37-Rh3  | 178.2(3)   |
| C67-Rh2-C27-N5  | 45.5(6)    | C34-N8-C37-Rh3  | -5.9(7)    |
| C66-Rh2-C27-N5  | -121.9(18) | C36-N9-C37-N8   | -0.2(5)    |
| C27-N4-C28-C29  | -0.2(6)    | C50-N9-C37-N8   | -175.3(4)  |
| C38-N4-C28-C29  | 175.6(5)   | C36-N9-C37-Rh3  | -177.8(4)  |
| N4-C28-C29-N5   | 1.1(6)     | C50-N9-C37-Rh3  | 7.2(8)     |
| C27-N5-C29-C28  | -1.6(6)    | C74-Rh3-C37-N8  | 118.7(5)   |
| C30-N5-C29-C28  | -175.3(5)  | N7-Rh3-C37-N8   | -35.9(4)   |
| C27-N5-C30-C31  | 56.0(6)    | C75-Rh3-C37-N8  | 155.4(4)   |
| C29-N5-C30-C31  | -131.1(5)  | C71-Rh3-C37-N8  | 40.6(8)    |
| N7-N6-C31-C32   | 0.4(6)     | C70-Rh3-C37-N8  | -130.7(12) |

Electronic Supplementary Information for Dalton Transactions  
This journal is © The Royal Society of Chemistry 2007

|                 |           |                 |           |
|-----------------|-----------|-----------------|-----------|
| C74-Rh3-C37-N9  | -64.1(6)  | C55-C50-C51-C52 | 1.6(7)    |
| N7-Rh3-C37-N9   | 141.3(5)  | N9-C50-C51-C52  | 178.3(4)  |
| C75-Rh3-C37-N9  | -27.4(6)  | C55-C50-C51-C56 | -178.3(5) |
| C71-Rh3-C37-N9  | -142.1(6) | N9-C50-C51-C56  | -1.6(7)   |
| C70-Rh3-C37-N9  | 46.5(16)  | C50-C51-C52-C53 | 0.6(8)    |
| C27-N4-C38-C43  | 100.4(6)  | C56-C51-C52-C53 | -179.5(5) |
| C28-N4-C38-C43  | -74.8(6)  | C51-C52-C53-C54 | -2.0(9)   |
| C27-N4-C38-C39  | -83.6(7)  | C52-C53-C54-C55 | 1.2(9)    |
| C28-N4-C38-C39  | 101.3(6)  | C51-C50-C55-C54 | -2.3(8)   |
| C43-C38-C39-C40 | -4.4(8)   | N9-C50-C55-C54  | -179.0(5) |
| N4-C38-C39-C40  | 179.8(5)  | C51-C50-C55-C59 | 176.0(5)  |
| C43-C38-C39-C44 | 178.3(5)  | N9-C50-C55-C59  | -0.7(7)   |
| N4-C38-C39-C44  | 2.5(8)    | C53-C54-C55-C50 | 0.9(8)    |
| C38-C39-C40-C41 | 2.4(10)   | C53-C54-C55-C59 | -177.4(5) |
| C44-C39-C40-C41 | 179.7(6)  | C50-C51-C56-C58 | -134.6(5) |
| C39-C40-C41-C42 | 0.2(11)   | C52-C51-C56-C58 | 45.5(7)   |
| C40-C41-C42-C43 | -1.0(11)  | C50-C51-C56-C57 | 104.0(6)  |
| C39-C38-C43-C42 | 3.7(8)    | C52-C51-C56-C57 | -75.8(6)  |
| N4-C38-C43-C42  | 179.6(5)  | C50-C55-C59-C60 | 147.8(5)  |
| C39-C38-C43-C47 | -178.1(5) | C54-C55-C59-C60 | -34.0(7)  |
| N4-C38-C43-C47  | -2.2(7)   | C50-C55-C59-C61 | -84.2(6)  |
| C41-C42-C43-C38 | -0.9(9)   | C54-C55-C59-C61 | 94.0(6)   |
| C41-C42-C43-C47 | -179.3(6) | C27-Rh2-C62-C63 | 101.6(4)  |
| C40-C39-C44-C45 | 83.4(17)  | N6-Rh2-C62-C63  | -176.4(4) |
| C38-C39-C44-C45 | -99.4(16) | C67-Rh2-C62-C63 | -106.7(4) |
| C40-C39-C44-C46 | -34.2(15) | C66-Rh2-C62-C63 | -73.1(4)  |
| C38-C39-C44-C46 | 143.0(15) | C27-Rh2-C62-C69 | -137.4(5) |
| C38-C43-C47-C49 | -133.2(6) | N6-Rh2-C62-C69  | -55.4(8)  |
| C42-C43-C47-C49 | 45.0(7)   | C63-Rh2-C62-C69 | 121.0(7)  |
| C38-C43-C47-C48 | 102.8(6)  | C67-Rh2-C62-C69 | 14.3(5)   |
| C42-C43-C47-C48 | -79.0(6)  | C66-Rh2-C62-C69 | 47.9(6)   |
| C37-N9-C50-C55  | -84.8(6)  | C69-C62-C63-C64 | 0.4(10)   |
| C36-N9-C50-C55  | 100.6(6)  | Rh2-C62-C63-C64 | 104.1(6)  |
| C37-N9-C50-C51  | 98.3(6)   | C69-C62-C63-Rh2 | -103.6(6) |
| C36-N9-C50-C51  | -76.3(6)  | C27-Rh2-C63-C62 | -81.0(4)  |

Electronic Supplementary Information for Dalton Transactions  
This journal is © The Royal Society of Chemistry 2007

|                 |           |                 |           |
|-----------------|-----------|-----------------|-----------|
| N6-Rh2-C63-C62  | 174.1(6)  | Rh2-C67-C68-C69 | 14.6(11)  |
| C67-Rh2-C63-C62 | 71.8(4)   | C67-C68-C69-C62 | -3.0(13)  |
| C66-Rh2-C63-C62 | 105.0(4)  | C63-C62-C69-C68 | 71.4(10)  |
| C27-Rh2-C63-C64 | 157.4(4)  | Rh2-C62-C69-C68 | -10.6(10) |
| N6-Rh2-C63-C64  | 52.5(10)  | C37-Rh3-C70-C71 | 173.6(12) |
| C62-Rh2-C63-C64 | -121.6(6) | C74-Rh3-C70-C71 | -75.8(5)  |
| C67-Rh2-C63-C64 | -49.8(5)  | N7-Rh3-C70-C71  | 79.6(4)   |
| C66-Rh2-C63-C64 | -16.6(5)  | C75-Rh3-C70-C71 | -111.1(5) |
| C62-C63-C64-C65 | -64.9(9)  | C37-Rh3-C70-C77 | -67.0(15) |
| Rh2-C63-C64-C65 | 16.9(8)   | C74-Rh3-C70-C77 | 43.7(6)   |
| C63-C64-C65-C66 | -5.2(11)  | N7-Rh3-C70-C77  | -161.0(6) |
| C64-C65-C66-C67 | 71.6(10)  | C75-Rh3-C70-C77 | 8.4(6)    |
| C64-C65-C66-Rh2 | -8.6(10)  | C71-Rh3-C70-C77 | 119.4(8)  |
| C27-Rh2-C66-C67 | 169.3(17) | C77-C70-C71-C72 | -2.9(12)  |
| N6-Rh2-C66-C67  | 84.9(4)   | Rh3-C70-C71-C72 | 99.2(8)   |
| C62-Rh2-C66-C67 | -72.4(4)  | C77-C70-C71-Rh3 | -102.1(7) |
| C63-Rh2-C66-C67 | -108.1(4) | C37-Rh3-C71-C70 | -177.4(5) |
| C27-Rh2-C66-C65 | -69(2)    | C74-Rh3-C71-C70 | 102.4(5)  |
| N6-Rh2-C66-C65  | -153.4(6) | N7-Rh3-C71-C70  | -101.6(4) |
| C62-Rh2-C66-C65 | 49.3(6)   | C75-Rh3-C71-C70 | 67.1(5)   |
| C63-Rh2-C66-C65 | 13.5(6)   | C37-Rh3-C71-C72 | 57.6(9)   |
| C67-Rh2-C66-C65 | 121.7(7)  | C74-Rh3-C71-C72 | -22.6(6)  |
| C65-C66-C67-C68 | 1.5(11)   | N7-Rh3-C71-C72  | 133.4(6)  |
| Rh2-C66-C67-C68 | 102.0(7)  | C75-Rh3-C71-C72 | -57.9(6)  |
| C65-C66-C67-Rh2 | -100.6(6) | C70-Rh3-C71-C72 | -125.0(8) |
| C27-Rh2-C67-C66 | -177.7(4) | C70-C71-C72-C73 | -54.5(13) |
| N6-Rh2-C67-C66  | -95.9(4)  | Rh3-C71-C72-C73 | 27.7(11)  |
| C62-Rh2-C67-C66 | 105.9(4)  | C71-C72-C73-C74 | -17.0(15) |
| C63-Rh2-C67-C66 | 70.4(4)   | C72-C73-C74-C75 | 78.0(13)  |
| C27-Rh2-C67-C68 | 61.0(8)   | C72-C73-C74-Rh3 | -3.5(12)  |
| N6-Rh2-C67-C68  | 142.8(6)  | C37-Rh3-C74-C75 | 98.9(4)   |
| C62-Rh2-C67-C68 | -15.4(6)  | N7-Rh3-C74-C75  | -176.8(4) |
| C63-Rh2-C67-C68 | -50.9(6)  | C71-Rh3-C74-C75 | -106.2(4) |
| C66-Rh2-C67-C68 | -121.3(8) | C70-Rh3-C74-C75 | -71.8(4)  |
| C66-C67-C68-C69 | -68.1(11) | C37-Rh3-C74-C73 | -140.3(6) |



Electronic Supplementary Information for Dalton Transactions  
This journal is © The Royal Society of Chemistry 2007

|                 |           |                 |           |
|-----------------|-----------|-----------------|-----------|
| N7-Rh3-C74-C73  | -56.1(8)  | C37-Rh3-C75-C76 | 152.5(5)  |
| C75-Rh3-C74-C73 | 120.8(7)  | C74-Rh3-C75-C76 | -123.2(7) |
| C71-Rh3-C74-C73 | 14.5(6)   | N7-Rh3-C75-C76  | 49.9(12)  |
| C70-Rh3-C74-C73 | 48.9(6)   | C71-Rh3-C75-C76 | -50.6(5)  |
| C73-C74-C75-C76 | 0.4(11)   | C70-Rh3-C75-C76 | -17.8(5)  |
| Rh3-C74-C75-C76 | 100.9(7)  | C74-C75-C76-C77 | -53.7(11) |
| C73-C74-C75-Rh3 | -100.6(7) | Rh3-C75-C76-C77 | 25.9(9)   |
| C37-Rh3-C75-C74 | -84.2(4)  | C75-C76-C77-C70 | -20.1(12) |
| N7-Rh3-C75-C74  | 173.1(8)  | C71-C70-C77-C76 | 84.2(11)  |
| C71-Rh3-C75-C74 | 72.7(4)   | Rh3-C70-C77-C76 | 4.2(11)   |
| C70-Rh3-C75-C74 | 105.4(4)  |                 |           |

---

Symmetry transformations used to generate equivalent atoms:

#1 -x+1,y,-z+1

### X-ray Structure of 6 (Bisiridium complex)

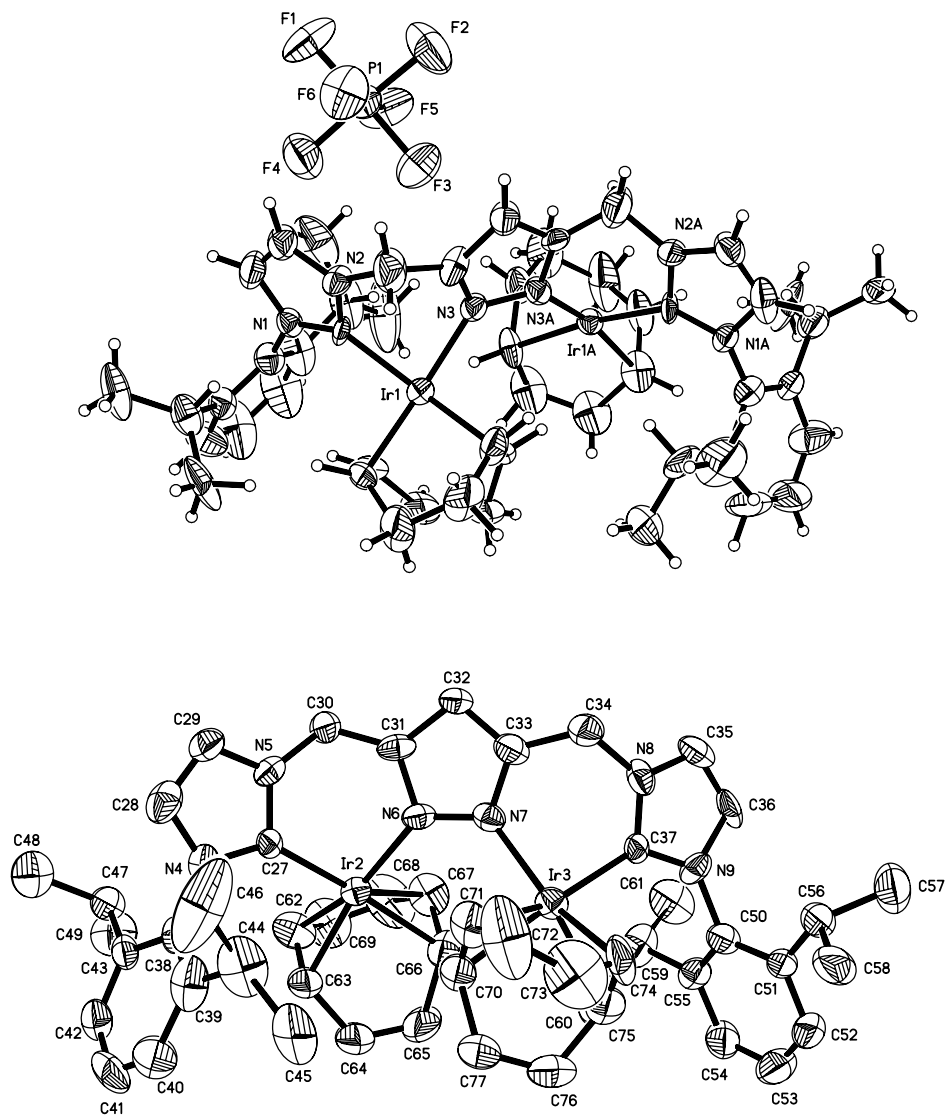

#### Data collection

A crystal (approximate dimensions 0.50 x 0.30 x 0.15 mm<sup>3</sup>) was placed onto the tip of a 0.1 mm diameter glass capillary and mounted on a Bruker SMART Platform CCD diffractometer for a data collection at 173(2) K.<sup>1</sup> A preliminary set of cell constants was calculated from reflections harvested from three sets of 20 frames. These initial sets of frames were oriented such that orthogonal wedges of reciprocal space were surveyed. This produced initial orientation matrices determined from 264 reflections. The data collection was carried out using MoK $\alpha$  radiation (graphite monochromator) with a frame time of 45 seconds and a detector distance of 4.894 cm. A randomly oriented region of reciprocal space was surveyed to the extent of one sphere and to a resolution of 0.84 Å. Four major sections of frames were collected with 0.50° steps in  $\omega$  at four different  $\phi$  settings and a detector position of -28° in  $2\theta$ . The intensity data were corrected for absorption and decay (SADABS).<sup>2</sup> Final cell constants were calculated from the xyz centroids of 3447 strong reflections from the actual data collection after integration (SAINT).<sup>3</sup> Please refer to Table 1 for additional crystal and refinement information.

#### Structure solution and refinement

The structure was solved using SIR97<sup>4</sup> and refined using SHELXL-97 (Sheldrick, 1997).<sup>4</sup> The space group C2 was determined based on systematic absences and intensity statistics. A direct-methods solution was calculated which provided most non-hydrogen atoms from the E-map. Full-matrix least squares / difference Fourier cycles were performed which located the remaining non-hydrogen atoms. All non-hydrogen atoms were refined with anisotropic displacement parameters. All hydrogen atoms were placed in ideal positions and refined as riding atoms with relative isotropic displacement parameters. The function SQUEEZE in the program PLATON<sup>6</sup> was used to model solvent accessible void space in the sample. 2309.3 Å<sup>3</sup> of solvent accessible void space, containing 769 electrons per unit cell was found. The sample was also modeled as a racemic twin (twin law: -1 0 0 0 -1 0 0 0 -1), in a 94:6 ratio. The final full matrix least squares refinement converged to  $R1 = 0.0466$  and  $wR2 = 0.1209$  ( $F^2$ , all data).

#### Structure description

The structure is the one suggested. The structure quality is questionable at best, but does show connectivity. The sample consists of one Ir dimer on a general position and a second Ir dimer on a 2-fold axis. The sample also contains one  $\text{PF}_6^-$  on a general position and a second  $\text{PF}_6^-$  disordered over an inversion center (50:50) as well as rotationally disordered (91:9). The sample also appears to have at least 4  $\text{CH}_2\text{Cl}_2$  molecules in the asymmetric unit, and may have as many as 5. As stated earlier, the SQUEEZE function from the program PLATON removed 2309.3  $\text{\AA}^3$  of solvent accessible void space, containing 769 electrons per unit cell. Since C2 has a Z = 4, 16  $\text{CH}_2\text{Cl}_2$  molecules would have an electron count of 672  $e^-$  and 20  $\text{CH}_2\text{Cl}_2$  molecules would have an electron count of 840  $e^-$ . Several of the propyl groups were modeled as disordered over two positions: C10-C12 (86:14), C13-C15 (81:19), and C44-C46 (67:33). Some of the thermal ellipsoids still look large, but attempts to model further disorder were unsuccessful.

---

<sup>1</sup> SMART V5.054, Bruker Analytical X-ray Systems, Madison, WI (2001).

<sup>2</sup> An empirical correction for absorption anisotropy, R. Blessing, *Acta Cryst.* **A51**, 33-38 (1995).

<sup>3</sup> SAINT+ V6.45, Bruker Analytical X-Ray Systems, Madison, WI (2003).

<sup>4</sup> A. Altomare, M. C. Burla, M. Camalli, G. Cascarano, C. Giacovazzo, A. Guagliardi, A. G. G. Moliterni, G. Polidori, R. Spagna. Sir97: a new tool for crystal structure determination and refinement. *J. Appl. Cryst.* **32**, 115-119 (1998).

<sup>5</sup> SHELXTL V6.14, Bruker Analytical X-Ray Systems, Madison, WI (2000).

<sup>6</sup> A. L. Spek, *Acta. Cryst.* **A46**, C34 (1990). PLATON, A Multipurpose Crystallographic Tool, Utrecht University, Utrecht, The Netherlands, A. L. Spek (2000).

### Tables for 6 (Bisiridium complex)

Table 1. Crystal data and structure refinement.

|                                        |                                                                                 |                           |
|----------------------------------------|---------------------------------------------------------------------------------|---------------------------|
| Identification code                    | zzzs                                                                            |                           |
| Empirical formula                      | C <sub>51</sub> H <sub>67</sub> F <sub>6</sub> Ir <sub>2</sub> N <sub>6</sub> P |                           |
| Formula weight                         | 1293.48                                                                         |                           |
| Temperature                            | 173(2) K                                                                        |                           |
| Wavelength                             | 0.71073 Å                                                                       |                           |
| Crystal system                         | Monoclinic                                                                      |                           |
| Space group                            | C2                                                                              |                           |
| Unit cell dimensions                   | $a = 30.809(8)$ Å                                                               | $\alpha = 90^\circ$       |
|                                        | $b = 18.203(5)$ Å                                                               | $\beta = 91.924(4)^\circ$ |
|                                        | $c = 16.420(4)$ Å                                                               | $\gamma = 90^\circ$       |
| Volume                                 | 9204(4) Å <sup>3</sup>                                                          |                           |
| Z                                      | 6                                                                               |                           |
| Density (calculated)                   | 1.400 Mg/m <sup>3</sup>                                                         |                           |
| Absorption coefficient                 | 4.411 mm <sup>-1</sup>                                                          |                           |
| $F(000)$                               | 3828                                                                            |                           |
| Crystal color, morphology              | orange, block                                                                   |                           |
| Crystal size                           | 0.50 x 0.30 x 0.15 mm <sup>3</sup>                                              |                           |
| Theta range for data collection        | 1.24 to 25.08°                                                                  |                           |
| Index ranges                           | $-36 \leq h \leq 36, -21 \leq k \leq 21, -19 \leq l \leq 19$                    |                           |
| Reflections collected                  | 45218                                                                           |                           |
| Independent reflections                | 16290 [ $R(\text{int}) = 0.0549$ ]                                              |                           |
| Observed reflections                   | 14518                                                                           |                           |
| Completeness to theta = 25.08°         | 99.8%                                                                           |                           |
| Absorption correction                  | Multi-scan                                                                      |                           |
| Max. and min. transmission             | 0.5575 and 0.2164                                                               |                           |
| Refinement method                      | Full-matrix least-squares on $F^2$                                              |                           |
| Data / restraints / parameters         | 16290 / 230 / 935                                                               |                           |
| Goodness-of-fit on $F^2$               | 1.036                                                                           |                           |
| Final $R$ indices [ $I > 2\sigma(I)$ ] | $R1 = 0.0466, wR2 = 0.1176$                                                     |                           |
| $R$ indices (all data)                 | $R1 = 0.0525, wR2 = 0.1209$                                                     |                           |

Electronic Supplementary Information for Dalton Transactions  
This journal is © The Royal Society of Chemistry 2007

|                              |                                    |
|------------------------------|------------------------------------|
| Absolute structure parameter | 0.059(9)                           |
| Largest diff. peak and hole  | 3.350 and -1.661 e.Å <sup>-3</sup> |

Table 2. Atomic coordinates ( $\times 10^4$ ) and equivalent isotropic displacement parameters ( $\text{\AA}^2 \times 10^3$ ).  $U_{\text{eq}}$  is defined as one third of the trace of the orthogonalized  $U_{ij}$  tensor.

|      | x        | y        | z        | $U_{\text{eq}}$ |
|------|----------|----------|----------|-----------------|
| Ir1  | 5424(1)  | 7957(1)  | 4021(1)  | 33(1)           |
| Ir2  | 8085(1)  | 8300(1)  | 2408(1)  | 32(1)           |
| Ir3  | 8466(1)  | 7103(1)  | 363(1)   | 36(1)           |
| P1   | 5389(1)  | 4043(2)  | 3505(2)  | 42(1)           |
| F1   | 5148(3)  | 3589(4)  | 2798(5)  | 83(3)           |
| F2   | 5205(3)  | 3547(5)  | 4212(6)  | 93(3)           |
| F3   | 5639(2)  | 4510(4)  | 4203(5)  | 67(2)           |
| F4   | 5596(3)  | 4531(5)  | 2838(5)  | 80(2)           |
| F5   | 4984(2)  | 4587(4)  | 3583(6)  | 76(2)           |
| F6   | 5784(3)  | 3485(4)  | 3460(5)  | 75(2)           |
| P2   | 5035(4)  | 5294(2)  | -58(6)   | 45(2)           |
| F7   | 4624(5)  | 5666(8)  | -491(9)  | 96(5)           |
| F8   | 4835(5)  | 4507(6)  | -244(11) | 82(5)           |
| F9   | 4799(5)  | 5311(9)  | 785(8)   | 67(4)           |
| F10  | 5235(5)  | 6079(5)  | 130(11)  | 82(5)           |
| F11  | 5446(4)  | 4920(8)  | 375(9)   | 96(5)           |
| F12  | 5271(4)  | 5277(9)  | -900(7)  | 67(4)           |
| P2'  | 5035(4)  | 5294(2)  | -58(6)   | 45(2)           |
| F7'  | 4700(30) | 5940(50) | -170(80) | 96(5)           |
| F8'  | 4750(30) | 4800(60) | -660(50) | 82(5)           |
| F9'  | 4770(30) | 4990(70) | 680(40)  | 67(4)           |
| F10' | 5320(30) | 5790(60) | 550(60)  | 82(5)           |
| F11' | 5370(30) | 4650(50) | 50(80)   | 96(5)           |
| F12' | 5300(30) | 5600(70) | -800(50) | 67(4)           |
| N1   | 5070(3)  | 7566(5)  | 2226(5)  | 36(2)           |
| N2   | 5261(3)  | 6634(4)  | 2977(5)  | 39(2)           |
| N3   | 5109(3)  | 7103(5)  | 4623(4)  | 35(2)           |
| N4   | 8444(3)  | 7899(5)  | 4203(5)  | 44(2)           |



Electronic Supplementary Information for Dalton Transactions  
This journal is © The Royal Society of Chemistry 2007

|      |          |          |           |         |
|------|----------|----------|-----------|---------|
| N5   | 8866(3)  | 8544(4)  | 3485(5)   | 37(2)   |
| N6   | 8661(2)  | 8225(5)  | 1773(5)   | 35(2)   |
| N7   | 8735(2)  | 8012(5)  | 1005(5)   | 34(2)   |
| N8   | 9005(2)  | 8053(5)  | -683(5)   | 39(2)   |
| N9   | 8452(3)  | 7784(4)  | -1424(5)  | 37(2)   |
| C1   | 5236(3)  | 7402(6)  | 2970(5)   | 34(2)   |
| C2   | 5011(4)  | 6900(8)  | 1777(7)   | 61(4)   |
| C3   | 5111(4)  | 6336(7)  | 2251(7)   | 52(3)   |
| C4   | 4999(2)  | 8248(4)  | 1872(4)   | 46(2)   |
| C5   | 4631(2)  | 8641(5)  | 2075(5)   | 72(4)   |
| C6   | 4561(3)  | 9341(6)  | 1758(7)   | 112(7)  |
| C7   | 4859(4)  | 9647(4)  | 1238(7)   | 111(7)  |
| C8   | 5227(3)  | 9254(4)  | 1036(5)   | 71(3)   |
| C9   | 5297(2)  | 8555(4)  | 1353(4)   | 42(2)   |
| C10  | 4277(4)  | 8299(9)  | 2614(7)   | 86(5)   |
| C11  | 4002(9)  | 8873(17) | 3010(12)  | 143(11) |
| C12  | 3989(6)  | 7797(16) | 2118(16)  | 110(7)  |
| C10' | 4277(4)  | 8299(9)  | 2614(7)   | 86(5)   |
| C11' | 4050(40) | 8280(90) | 3410(40)  | 143(11) |
| C12' | 4120(50) | 7660(70) | 2100(100) | 110(7)  |
| C13  | 5703(4)  | 8139(7)  | 1126(7)   | 59(3)   |
| C14  | 6133(17) | 8490(60) | 1490(50)  | 98(7)   |
| C15  | 5800(30) | 7710(50) | 320(40)   | 73(5)   |
| C13' | 5703(4)  | 8139(7)  | 1126(7)   | 59(3)   |
| C14' | 6104(5)  | 8657(14) | 1149(15)  | 98(7)   |
| C15' | 5628(8)  | 7802(12) | 247(8)    | 73(5)   |
| C16  | 5415(6)  | 6228(9)  | 3710(8)   | 73(4)   |
| C17  | 5174(4)  | 6438(6)  | 4418(6)   | 46(3)   |
| C18  | 5000     | 5947(9)  | 5000      | 53(4)   |
| C19  | 5597(4)  | 8939(7)  | 3399(8)   | 59(3)   |
| C20  | 5948(4)  | 8500(8)  | 3448(7)   | 58(3)   |
| C21  | 6355(4)  | 8605(14) | 4021(8)   | 108(7)  |
| C22  | 6305(4)  | 8141(13) | 4838(8)   | 92(5)   |

Electronic Supplementary Information for Dalton Transactions  
This journal is © The Royal Society of Chemistry 2007

|      |          |          |          |         |
|------|----------|----------|----------|---------|
| C23  | 5849(3)  | 8054(8)  | 5077(6)  | 54(3)   |
| C24  | 5549(4)  | 8627(6)  | 5104(6)  | 46(2)   |
| C25  | 5642(6)  | 9426(7)  | 4887(9)  | 77(4)   |
| C26  | 5554(6)  | 9605(7)  | 3999(9)  | 79(4)   |
| C27  | 8466(3)  | 8228(5)  | 3458(5)  | 29(1)   |
| C28  | 8823(3)  | 8042(8)  | 4666(7)  | 55(3)   |
| C29  | 9075(3)  | 8461(7)  | 4211(7)  | 49(3)   |
| C30  | 9019(4)  | 9011(6)  | 2844(6)  | 45(3)   |
| C31  | 9008(3)  | 8630(5)  | 2049(6)  | 36(2)   |
| C32  | 9310(3)  | 8701(6)  | 1412(6)  | 39(2)   |
| C33  | 9126(3)  | 8258(7)  | 796(6)   | 46(2)   |
| C34  | 9325(3)  | 8064(6)  | 25(6)    | 45(2)   |
| C35  | 9066(3)  | 8406(6)  | -1385(7) | 47(3)   |
| C36  | 8716(4)  | 8249(7)  | -1849(6) | 46(3)   |
| C37  | 8638(3)  | 7674(5)  | -663(5)  | 29(1)   |
| C38  | 8089(3)  | 7493(6)  | 4518(6)  | 41(2)   |
| C39  | 8058(5)  | 6724(7)  | 4341(8)  | 65(4)   |
| C40  | 7665(7)  | 6404(9)  | 4698(10) | 89(6)   |
| C41  | 7405(6)  | 6735(9)  | 5180(9)  | 75(4)   |
| C42  | 7473(4)  | 7464(7)  | 5365(7)  | 52(3)   |
| C43  | 7830(3)  | 7820(6)  | 5064(6)  | 39(2)   |
| C44  | 8335(5)  | 6351(7)  | 3795(9)  | 81(4)   |
| C45  | 8162(12) | 5653(11) | 3251(14) | 75(6)   |
| C46  | 8809(13) | 6210(20) | 4260(30) | 149(14) |
| C44' | 8335(5)  | 6351(7)  | 3795(9)  | 81(4)   |
| C45' | 7980(17) | 5850(30) | 3280(30) | 75(6)   |
| C46' | 8740(30) | 5870(40) | 4190(70) | 149(14) |
| C47  | 7866(4)  | 8636(6)  | 5290(7)  | 45(3)   |
| C48  | 8077(5)  | 8658(8)  | 6161(8)  | 66(4)   |
| C49  | 7458(5)  | 9071(9)  | 5221(10) | 74(4)   |
| C50  | 8060(3)  | 7454(6)  | -1800(6) | 43(2)   |
| C51  | 8122(4)  | 6853(6)  | -2322(6) | 43(2)   |
| C52  | 7752(4)  | 6540(7)  | -2681(7) | 53(3)   |

Electronic Supplementary Information for Dalton Transactions  
This journal is © The Royal Society of Chemistry 2007

|     |         |          |           |        |
|-----|---------|----------|-----------|--------|
| C53 | 7344(5) | 6832(8)  | -2515(8)  | 68(4)  |
| C54 | 7292(4) | 7419(9)  | -2026(7)  | 60(3)  |
| C55 | 7665(4) | 7762(5)  | -1646(6)  | 41(2)  |
| C56 | 8559(4) | 6555(6)  | -2503(7)  | 54(3)  |
| C57 | 8708(6) | 6744(9)  | -3346(8)  | 81(5)  |
| C58 | 8599(5) | 5686(8)  | -2430(10) | 85(5)  |
| C59 | 7607(4) | 8430(7)  | -1120(8)  | 60(3)  |
| C60 | 7182(4) | 8436(12) | -660(8)   | 86(5)  |
| C61 | 7667(5) | 9147(7)  | -1657(10) | 79(5)  |
| C62 | 7585(4) | 8806(7)  | 3053(9)   | 58(3)  |
| C63 | 7484(3) | 8068(7)  | 2947(7)   | 48(2)  |
| C64 | 7152(4) | 7814(10) | 2328(8)   | 77(4)  |
| C65 | 7230(4) | 7887(13) | 1531(9)   | 101(6) |
| C66 | 7678(3) | 8225(8)  | 1311(6)   | 50(2)  |
| C67 | 7815(4) | 8921(7)  | 1444(8)   | 55(3)  |
| C68 | 7521(6) | 9543(9)  | 1824(11)  | 88(5)  |
| C69 | 7389(5) | 9433(9)  | 2590(10)  | 80(4)  |
| C70 | 8178(4) | 6601(6)  | 1416(7)   | 49(2)  |
| C71 | 8598(5) | 6404(6)  | 1382(7)   | 56(3)  |
| C72 | 8793(9) | 5703(11) | 1128(11)  | 115(7) |
| C73 | 8639(7) | 5468(8)  | 403(13)   | 103(5) |
| C74 | 8481(5) | 6073(7)  | -226(7)   | 65(3)  |
| C75 | 8055(5) | 6310(6)  | -211(8)   | 59(3)  |
| C76 | 7693(5) | 6045(10) | 347(9)    | 86(5)  |
| C77 | 7842(6) | 6050(9)  | 1182(9)   | 79(4)  |

---

Table 3. Bond lengths [Å] and angles [°].

|             |           |             |           |
|-------------|-----------|-------------|-----------|
| Ir(1)-C(1)  | 2.067(9)  | N(1)-C(4)   | 1.385(10) |
| Ir(1)-N(3)  | 2.097(9)  | N(1)-C(2)   | 1.428(16) |
| Ir(1)-C(19) | 2.136(12) | N(2)-C(3)   | 1.374(14) |
| Ir(1)-C(20) | 2.138(10) | N(2)-C(1)   | 1.399(13) |
| Ir(1)-C(23) | 2.144(10) | N(2)-C(16)  | 1.477(15) |
| Ir(1)-C(24) | 2.180(10) | N(3)-C(17)  | 1.274(13) |
| Ir(2)-C(27) | 2.056(9)  | N(3)-N(3)#1 | 1.430(15) |
| Ir(2)-N(6)  | 2.092(7)  | N(4)-C(27)  | 1.367(12) |
| Ir(2)-C(67) | 2.093(11) | N(4)-C(28)  | 1.396(14) |
| Ir(2)-C(62) | 2.110(11) | N(4)-C(38)  | 1.433(14) |
| Ir(2)-C(63) | 2.121(10) | N(5)-C(29)  | 1.346(13) |
| Ir(2)-C(66) | 2.164(10) | N(5)-C(27)  | 1.360(12) |
| Ir(3)-C(37) | 2.063(9)  | N(5)-C(30)  | 1.444(13) |
| Ir(3)-C(74) | 2.111(12) | N(6)-N(7)   | 1.347(11) |
| Ir(3)-N(7)  | 2.115(8)  | N(6)-C(31)  | 1.364(12) |
| Ir(3)-C(75) | 2.121(12) | N(7)-C(33)  | 1.342(12) |
| Ir(3)-C(71) | 2.131(10) | N(8)-C(37)  | 1.325(12) |
| Ir(3)-C(70) | 2.173(11) | N(8)-C(35)  | 1.338(13) |
| P(1)-F(4)   | 1.563(8)  | N(8)-C(34)  | 1.499(13) |
| P(1)-F(6)   | 1.587(7)  | N(9)-C(37)  | 1.372(12) |
| P(1)-F(1)   | 1.589(7)  | N(9)-C(36)  | 1.378(13) |
| P(1)-F(2)   | 1.590(8)  | N(9)-C(50)  | 1.467(13) |
| P(1)-F(3)   | 1.603(7)  | C(2)-C(3)   | 1.319(19) |
| P(1)-F(5)   | 1.603(7)  | C(2)-H(2A)  | 0.9500    |
| P(2)-F(10)  | 1.583(6)  | C(3)-H(3A)  | 0.9500    |
| P(2)-F(8)   | 1.584(6)  | C(4)-C(5)   | 1.3900    |
| P(2)-F(7)   | 1.585(6)  | C(4)-C(9)   | 1.3900    |
| P(2)-F(11)  | 1.585(6)  | C(5)-C(6)   | 1.3900    |
| P(2)-F(12)  | 1.585(6)  | C(5)-C(10)  | 1.559(16) |
| P(2)-F(9)   | 1.585(6)  | C(6)-C(7)   | 1.3900    |
| N(1)-C(1)   | 1.342(12) | C(6)-H(6)   | 0.9500    |

|               |           |               |           |
|---------------|-----------|---------------|-----------|
| C(7)-C(8)     | 1.3900    | C(15')-H(15E) | 0.9800    |
| C(7)-H(7)     | 0.9500    | C(15')-H(15F) | 0.9800    |
| C(8)-C(9)     | 1.3900    | C(16)-C(17)   | 1.452(18) |
| C(8)-H(8)     | 0.9500    | C(16)-H(16A)  | 0.9900    |
| C(9)-C(13)    | 1.520(13) | C(16)-H(16B)  | 0.9900    |
| C(10)-C(12)   | 1.495(19) | C(17)-C(18)   | 1.426(15) |
| C(10)-C(11)   | 1.506(18) | C(18)-C(17)#1 | 1.426(15) |
| C(10)-H(10)   | 1.0000    | C(18)-H(18A)  | 0.9500    |
| C(11)-H(11A)  | 0.9800    | C(19)-C(20)   | 1.345(19) |
| C(11)-H(11B)  | 0.9800    | C(19)-C(26)   | 1.570(18) |
| C(11)-H(11C)  | 0.9800    | C(19)-H(19A)  | 1.0000    |
| C(12)-H(12A)  | 0.9800    | C(20)-C(21)   | 1.552(18) |
| C(12)-H(12B)  | 0.9800    | C(20)-H(20A)  | 1.0000    |
| C(12)-H(12C)  | 0.9800    | C(21)-C(22)   | 1.60(2)   |
| C(11')-H(11D) | 0.9800    | C(21)-H(21A)  | 0.9900    |
| C(11')-H(11E) | 0.9800    | C(21)-H(21B)  | 0.9900    |
| C(11')-H(11F) | 0.9800    | C(22)-C(23)   | 1.479(17) |
| C(12')-H(12D) | 0.9800    | C(22)-H(22A)  | 0.9900    |
| C(12')-H(12E) | 0.9800    | C(22)-H(22B)  | 0.9900    |
| C(12')-H(12F) | 0.9800    | C(23)-C(24)   | 1.396(17) |
| C(13)-C(14)   | 1.57(2)   | C(23)-H(23A)  | 1.0000    |
| C(13)-C(15)   | 1.57(2)   | C(24)-C(25)   | 1.527(17) |
| C(13)-H(13)   | 1.0000    | C(24)-H(24A)  | 1.0000    |
| C(14)-H(14A)  | 0.9800    | C(25)-C(26)   | 1.51(2)   |
| C(14)-H(14B)  | 0.9800    | C(25)-H(25A)  | 0.9900    |
| C(14)-H(14C)  | 0.9800    | C(25)-H(25B)  | 0.9900    |
| C(15)-H(15A)  | 0.9800    | C(26)-H(26A)  | 0.9900    |
| C(15)-H(15B)  | 0.9800    | C(26)-H(26B)  | 0.9900    |
| C(15)-H(15C)  | 0.9800    | C(28)-C(29)   | 1.334(17) |
| C(14')-H(14D) | 0.9800    | C(28)-H(28A)  | 0.9500    |
| C(14')-H(14E) | 0.9800    | C(29)-H(29A)  | 0.9500    |
| C(14')-H(14F) | 0.9800    | C(30)-C(31)   | 1.477(15) |
| C(15')-H(15D) | 0.9800    | C(30)-H(30A)  | 0.9900    |

|               |           |               |           |
|---------------|-----------|---------------|-----------|
| C(30)-H(30B)  | 0.9900    | C(46')-H(46D) | 0.9800    |
| C(31)-C(32)   | 1.431(14) | C(46')-H(46E) | 0.9800    |
| C(32)-C(33)   | 1.398(15) | C(46')-H(46F) | 0.9800    |
| C(32)-H(32A)  | 0.9500    | C(47)-C(49)   | 1.488(17) |
| C(33)-C(34)   | 1.467(14) | C(47)-C(48)   | 1.552(18) |
| C(34)-H(34A)  | 0.9900    | C(47)-H(47A)  | 1.0000    |
| C(34)-H(34B)  | 0.9900    | C(48)-H(48A)  | 0.9800    |
| C(35)-C(36)   | 1.331(16) | C(48)-H(48B)  | 0.9800    |
| C(35)-H(35A)  | 0.9500    | C(48)-H(48C)  | 0.9800    |
| C(36)-H(36A)  | 0.9500    | C(49)-H(49A)  | 0.9800    |
| C(38)-C(43)   | 1.357(15) | C(49)-H(49B)  | 0.9800    |
| C(38)-C(39)   | 1.431(17) | C(49)-H(49C)  | 0.9800    |
| C(39)-C(44)   | 1.43(2)   | C(50)-C(55)   | 1.370(15) |
| C(39)-C(40)   | 1.48(2)   | C(50)-C(51)   | 1.407(15) |
| C(40)-C(41)   | 1.29(2)   | C(51)-C(52)   | 1.387(15) |
| C(40)-H(40A)  | 0.9500    | C(51)-C(56)   | 1.491(17) |
| C(41)-C(42)   | 1.38(2)   | C(52)-C(53)   | 1.40(2)   |
| C(41)-H(41A)  | 0.9500    | C(52)-H(52A)  | 0.9500    |
| C(42)-C(43)   | 1.382(16) | C(53)-C(54)   | 1.348(19) |
| C(42)-H(42A)  | 0.9500    | C(53)-H(53A)  | 0.9500    |
| C(43)-C(47)   | 1.535(15) | C(54)-C(55)   | 1.434(16) |
| C(44)-C(45)   | 1.632(18) | C(54)-H(54A)  | 0.9500    |
| C(44)-C(46)   | 1.65(2)   | C(55)-C(59)   | 1.506(15) |
| C(44)-H(44)   | 1.0000    | C(56)-C(57)   | 1.512(17) |
| C(45)-H(45A)  | 0.9800    | C(56)-C(58)   | 1.59(2)   |
| C(45)-H(45B)  | 0.9800    | C(56)-H(56A)  | 1.0000    |
| C(45)-H(45C)  | 0.9800    | C(57)-H(57A)  | 0.9800    |
| C(46)-H(46A)  | 0.9800    | C(57)-H(57B)  | 0.9800    |
| C(46)-H(46B)  | 0.9800    | C(57)-H(57C)  | 0.9800    |
| C(46)-H(46C)  | 0.9800    | C(58)-H(58A)  | 0.9800    |
| C(45')-H(45D) | 0.9800    | C(58)-H(58B)  | 0.9800    |
| C(45')-H(45E) | 0.9800    | C(58)-H(58C)  | 0.9800    |
| C(45')-H(45F) | 0.9800    | C(59)-C(60)   | 1.533(18) |

Electronic Supplementary Information for Dalton Transactions  
This journal is © The Royal Society of Chemistry 2007

|              |           |                   |           |
|--------------|-----------|-------------------|-----------|
| C(59)-C(61)  | 1.59(2)   | C(72)-C(73)       | 1.34(3)   |
| C(59)-H(59A) | 1.0000    | C(72)-H(72A)      | 0.9900    |
| C(60)-H(60A) | 0.9800    | C(72)-H(72B)      | 0.9900    |
| C(60)-H(60B) | 0.9800    | C(73)-C(74)       | 1.58(2)   |
| C(60)-H(60C) | 0.9800    | C(73)-H(73A)      | 0.9900    |
| C(61)-H(61A) | 0.9800    | C(73)-H(73B)      | 0.9900    |
| C(61)-H(61B) | 0.9800    | C(74)-C(75)       | 1.38(2)   |
| C(61)-H(61C) | 0.9800    | C(74)-H(74A)      | 1.0000    |
| C(62)-C(63)  | 1.388(18) | C(75)-C(76)       | 1.543(19) |
| C(62)-C(69)  | 1.489(19) | C(75)-H(75A)      | 1.0000    |
| C(62)-H(62A) | 1.0000    | C(76)-C(77)       | 1.43(2)   |
| C(63)-C(64)  | 1.493(16) | C(76)-H(76A)      | 0.9900    |
| C(63)-H(63A) | 1.0000    | C(76)-H(76B)      | 0.9900    |
| C(64)-C(65)  | 1.345(19) | C(77)-H(77A)      | 0.9900    |
| C(64)-H(64A) | 0.9900    | C(77)-H(77B)      | 0.9900    |
| C(64)-H(64B) | 0.9900    |                   |           |
| C(65)-C(66)  | 1.565(17) | C(1)-Ir(1)-N(3)   | 84.8(3)   |
| C(65)-H(65A) | 0.9900    | C(1)-Ir(1)-C(19)  | 94.4(4)   |
| C(65)-H(65B) | 0.9900    | N(3)-Ir(1)-C(19)  | 166.6(4)  |
| C(66)-C(67)  | 1.350(18) | C(1)-Ir(1)-C(20)  | 93.1(4)   |
| C(66)-H(66A) | 1.0000    | N(3)-Ir(1)-C(20)  | 156.7(5)  |
| C(67)-C(68)  | 1.592(18) | C(19)-Ir(1)-C(20) | 36.7(5)   |
| C(67)-H(67A) | 1.0000    | C(1)-Ir(1)-C(23)  | 149.6(5)  |
| C(68)-C(69)  | 1.35(2)   | N(3)-Ir(1)-C(23)  | 87.7(4)   |
| C(68)-H(68A) | 0.9900    | C(19)-Ir(1)-C(23) | 99.3(5)   |
| C(68)-H(68B) | 0.9900    | C(20)-Ir(1)-C(23) | 82.4(5)   |
| C(69)-H(69A) | 0.9900    | C(1)-Ir(1)-C(24)  | 172.7(5)  |
| C(69)-H(69B) | 0.9900    | N(3)-Ir(1)-C(24)  | 95.8(3)   |
| C(70)-C(71)  | 1.346(18) | C(19)-Ir(1)-C(24) | 83.2(4)   |
| C(70)-C(77)  | 1.482(17) | C(20)-Ir(1)-C(24) | 89.2(4)   |
| C(70)-H(70A) | 1.0000    | C(23)-Ir(1)-C(24) | 37.7(5)   |
| C(71)-C(72)  | 1.48(2)   | C(27)-Ir(2)-N(6)  | 86.8(3)   |
| C(71)-H(71A) | 1.0000    | C(27)-Ir(2)-C(67) | 150.3(5)  |

Electronic Supplementary Information for Dalton Transactions  
 This journal is © The Royal Society of Chemistry 2007

|                   |          |                   |           |
|-------------------|----------|-------------------|-----------|
| N(6)-Ir(2)-C(67)  | 88.8(4)  | F(1)-P(1)-F(2)    | 94.0(6)   |
| C(27)-Ir(2)-C(62) | 90.7(4)  | F(4)-P(1)-F(3)    | 90.0(5)   |
| N(6)-Ir(2)-C(62)  | 157.6(4) | F(6)-P(1)-F(3)    | 91.2(4)   |
| C(67)-Ir(2)-C(62) | 82.3(5)  | F(1)-P(1)-F(3)    | 178.6(5)  |
| C(27)-Ir(2)-C(63) | 96.8(4)  | F(2)-P(1)-F(3)    | 87.4(5)   |
| N(6)-Ir(2)-C(63)  | 164.1(4) | F(4)-P(1)-F(5)    | 92.4(5)   |
| C(67)-Ir(2)-C(63) | 95.4(5)  | F(6)-P(1)-F(5)    | 177.6(5)  |
| C(62)-Ir(2)-C(63) | 38.3(5)  | F(1)-P(1)-F(5)    | 91.9(4)   |
| C(27)-Ir(2)-C(66) | 172.7(5) | F(2)-P(1)-F(5)    | 89.7(5)   |
| N(6)-Ir(2)-C(66)  | 93.3(3)  | F(3)-P(1)-F(5)    | 88.4(4)   |
| C(67)-Ir(2)-C(66) | 36.9(5)  | F(10)-P(2)-F(8)   | 179.9(3)  |
| C(62)-Ir(2)-C(66) | 91.9(5)  | F(10)-P(2)-F(7)   | 90.0(2)   |
| C(63)-Ir(2)-C(66) | 81.1(4)  | F(8)-P(2)-F(7)    | 90.0(2)   |
| C(37)-Ir(3)-C(74) | 93.6(4)  | F(10)-P(2)-F(11)  | 90.0(2)   |
| C(37)-Ir(3)-N(7)  | 84.6(3)  | F(8)-P(2)-F(11)   | 90.0(2)   |
| C(74)-Ir(3)-N(7)  | 155.4(5) | F(7)-P(2)-F(11)   | 179.9(3)  |
| C(37)-Ir(3)-C(75) | 98.4(4)  | F(10)-P(2)-F(12)  | 90.0(2)   |
| C(74)-Ir(3)-C(75) | 38.1(6)  | F(8)-P(2)-F(12)   | 90.1(2)   |
| N(7)-Ir(3)-C(75)  | 166.3(4) | F(7)-P(2)-F(12)   | 90.0(2)   |
| C(37)-Ir(3)-C(71) | 153.4(4) | F(11)-P(2)-F(12)  | 90.0(2)   |
| C(74)-Ir(3)-C(71) | 79.8(5)  | F(10)-P(2)-F(9)   | 90.0(2)   |
| N(7)-Ir(3)-C(71)  | 90.9(4)  | F(8)-P(2)-F(9)    | 90.0(2)   |
| C(75)-Ir(3)-C(71) | 92.2(5)  | F(7)-P(2)-F(9)    | 90.0(2)   |
| C(37)-Ir(3)-C(70) | 170.1(4) | F(11)-P(2)-F(9)   | 90.0(2)   |
| C(74)-Ir(3)-C(70) | 90.4(4)  | F(12)-P(2)-F(9)   | 179.9(3)  |
| N(7)-Ir(3)-C(70)  | 95.5(4)  | C(1)-N(1)-C(4)    | 129.1(8)  |
| C(75)-Ir(3)-C(70) | 79.2(4)  | C(1)-N(1)-C(2)    | 108.6(9)  |
| C(71)-Ir(3)-C(70) | 36.4(5)  | C(4)-N(1)-C(2)    | 122.0(8)  |
| F(4)-P(1)-F(6)    | 90.0(5)  | C(3)-N(2)-C(1)    | 111.8(9)  |
| F(4)-P(1)-F(1)    | 88.6(5)  | C(3)-N(2)-C(16)   | 126.7(10) |
| F(6)-P(1)-F(1)    | 88.5(4)  | C(1)-N(2)-C(16)   | 121.5(9)  |
| F(4)-P(1)-F(2)    | 176.6(6) | C(17)-N(3)-N(3)#1 | 108.1(6)  |
| F(6)-P(1)-F(2)    | 87.9(5)  | C(17)-N(3)-Ir(1)  | 120.1(7)  |



Electronic Supplementary Information for Dalton Transactions  
This journal is © The Royal Society of Chemistry 2007

|                   |           |                      |           |
|-------------------|-----------|----------------------|-----------|
| N(3)#1-N(3)-Ir(1) | 130.3(3)  | C(6)-C(5)-C(10)      | 118.4(7)  |
| C(27)-N(4)-C(28)  | 110.0(9)  | C(5)-C(6)-C(7)       | 120.0     |
| C(27)-N(4)-C(38)  | 127.5(8)  | C(5)-C(6)-H(6)       | 120.0     |
| C(28)-N(4)-C(38)  | 122.4(9)  | C(7)-C(6)-H(6)       | 120.0     |
| C(29)-N(5)-C(27)  | 112.9(8)  | C(8)-C(7)-C(6)       | 120.0     |
| C(29)-N(5)-C(30)  | 123.6(9)  | C(8)-C(7)-H(7)       | 120.0     |
| C(27)-N(5)-C(30)  | 122.9(8)  | C(6)-C(7)-H(7)       | 120.0     |
| N(7)-N(6)-C(31)   | 108.2(7)  | C(7)-C(8)-C(9)       | 120.0     |
| N(7)-N(6)-Ir(2)   | 131.2(5)  | C(7)-C(8)-H(8)       | 120.0     |
| C(31)-N(6)-Ir(2)  | 117.9(6)  | C(9)-C(8)-H(8)       | 120.0     |
| C(33)-N(7)-N(6)   | 108.9(8)  | C(8)-C(9)-C(4)       | 120.0     |
| C(33)-N(7)-Ir(3)  | 118.3(7)  | C(8)-C(9)-C(13)      | 118.9(6)  |
| N(6)-N(7)-Ir(3)   | 128.1(6)  | C(4)-C(9)-C(13)      | 121.1(6)  |
| C(37)-N(8)-C(35)  | 114.6(8)  | C(12)-C(10)-C(11)    | 109.2(17) |
| C(37)-N(8)-C(34)  | 121.7(8)  | C(12)-C(10)-C(5)     | 110.4(13) |
| C(35)-N(8)-C(34)  | 123.7(9)  | C(11)-C(10)-C(5)     | 112.5(16) |
| C(37)-N(9)-C(36)  | 108.4(8)  | C(12)-C(10)-H(10)    | 108.2     |
| C(37)-N(9)-C(50)  | 129.6(8)  | C(11)-C(10)-H(10)    | 108.2     |
| C(36)-N(9)-C(50)  | 121.9(9)  | C(5)-C(10)-H(10)     | 108.2     |
| N(1)-C(1)-N(2)    | 104.4(8)  | C(10)-C(11)-H(11A)   | 109.5     |
| N(1)-C(1)-Ir(1)   | 137.7(8)  | C(10)-C(11)-H(11B)   | 109.5     |
| N(2)-C(1)-Ir(1)   | 117.9(7)  | H(11A)-C(11)-H(11B)  | 109.5     |
| C(3)-C(2)-N(1)    | 109.4(10) | C(10)-C(11)-H(11C)   | 109.5     |
| C(3)-C(2)-H(2A)   | 125.3     | H(11A)-C(11)-H(11C)  | 109.5     |
| N(1)-C(2)-H(2A)   | 125.3     | H(11B)-C(11)-H(11C)  | 109.5     |
| C(2)-C(3)-N(2)    | 105.7(10) | C(10)-C(12)-H(12A)   | 109.5     |
| C(2)-C(3)-H(3A)   | 127.2     | C(10)-C(12)-H(12B)   | 109.5     |
| N(2)-C(3)-H(3A)   | 127.2     | H(12A)-C(12)-H(12B)  | 109.5     |
| N(1)-C(4)-C(5)    | 118.7(6)  | C(10)-C(12)-H(12C)   | 109.5     |
| N(1)-C(4)-C(9)    | 121.2(6)  | H(12A)-C(12)-H(12C)  | 109.5     |
| C(5)-C(4)-C(9)    | 120.0     | H(12B)-C(12)-H(12C)  | 109.5     |
| C(4)-C(5)-C(6)    | 120.0     | H(11D)-C(11')-H(11E) | 109.5     |
| C(4)-C(5)-C(10)   | 121.5(7)  | H(11D)-C(11')-H(11F) | 109.5     |

Electronic Supplementary Information for Dalton Transactions  
This journal is © The Royal Society of Chemistry 2007

|                      |           |                      |           |
|----------------------|-----------|----------------------|-----------|
| H(11E)-C(11')-H(11F) | 109.5     | H(16A)-C(16)-H(16B)  | 108.0     |
| H(12D)-C(12')-H(12E) | 109.5     | N(3)-C(17)-C(18)     | 110.7(10) |
| H(12D)-C(12')-H(12F) | 109.5     | N(3)-C(17)-C(16)     | 123.4(11) |
| H(12E)-C(12')-H(12F) | 109.5     | C(18)-C(17)-C(16)    | 125.9(11) |
| C(9)-C(13)-C(14)     | 113(4)    | C(17)-C(18)-C(17)#1  | 102.4(13) |
| C(9)-C(13)-C(15)     | 129(3)    | C(17)-C(18)-H(18A)   | 128.8     |
| C(14)-C(13)-C(15)    | 111(3)    | C(17)#1-C(18)-H(18A) | 128.8     |
| C(9)-C(13)-H(13)     | 99.1      | C(20)-C(19)-C(26)    | 120.4(13) |
| C(14)-C(13)-H(13)    | 99.1      | C(20)-C(19)-Ir(1)    | 71.7(7)   |
| C(15)-C(13)-H(13)    | 99.1      | C(26)-C(19)-Ir(1)    | 108.5(8)  |
| C(13)-C(14)-H(14A)   | 109.5     | C(20)-C(19)-H(19A)   | 115.9     |
| C(13)-C(14)-H(14B)   | 109.5     | C(26)-C(19)-H(19A)   | 115.9     |
| H(14A)-C(14)-H(14B)  | 109.5     | Ir(1)-C(19)-H(19A)   | 115.9     |
| C(13)-C(14)-H(14C)   | 109.5     | C(19)-C(20)-C(21)    | 126.4(13) |
| H(14A)-C(14)-H(14C)  | 109.5     | C(19)-C(20)-Ir(1)    | 71.6(6)   |
| H(14B)-C(14)-H(14C)  | 109.5     | C(21)-C(20)-Ir(1)    | 113.3(9)  |
| C(13)-C(15)-H(15A)   | 109.5     | C(19)-C(20)-H(20A)   | 112.9     |
| C(13)-C(15)-H(15B)   | 109.5     | C(21)-C(20)-H(20A)   | 112.9     |
| H(15A)-C(15)-H(15B)  | 109.5     | Ir(1)-C(20)-H(20A)   | 112.9     |
| C(13)-C(15)-H(15C)   | 109.5     | C(20)-C(21)-C(22)    | 110.3(11) |
| H(15A)-C(15)-H(15C)  | 109.5     | C(20)-C(21)-H(21A)   | 109.6     |
| H(15B)-C(15)-H(15C)  | 109.5     | C(22)-C(21)-H(21A)   | 109.6     |
| H(14D)-C(14')-H(14E) | 109.5     | C(20)-C(21)-H(21B)   | 109.6     |
| H(14D)-C(14')-H(14F) | 109.5     | C(22)-C(21)-H(21B)   | 109.6     |
| H(14E)-C(14')-H(14F) | 109.5     | H(21A)-C(21)-H(21B)  | 108.1     |
| H(15D)-C(15')-H(15E) | 109.5     | C(23)-C(22)-C(21)    | 113.4(12) |
| H(15D)-C(15')-H(15F) | 109.5     | C(23)-C(22)-H(22A)   | 108.9     |
| H(15E)-C(15')-H(15F) | 109.5     | C(21)-C(22)-H(22A)   | 108.9     |
| C(17)-C(16)-N(2)     | 111.2(12) | C(23)-C(22)-H(22B)   | 108.9     |
| C(17)-C(16)-H(16A)   | 109.4     | C(21)-C(22)-H(22B)   | 108.9     |
| N(2)-C(16)-H(16A)    | 109.4     | H(22A)-C(22)-H(22B)  | 107.7     |
| C(17)-C(16)-H(16B)   | 109.4     | C(24)-C(23)-C(22)    | 124.4(14) |
| N(2)-C(16)-H(16B)    | 109.4     | C(24)-C(23)-Ir(1)    | 72.6(6)   |

Electronic Supplementary Information for Dalton Transactions  
This journal is © The Royal Society of Chemistry 2007

|                     |           |                     |           |
|---------------------|-----------|---------------------|-----------|
| C(22)-C(23)-Ir(1)   | 110.7(8)  | C(31)-C(30)-H(30A)  | 109.3     |
| C(24)-C(23)-H(23A)  | 113.9     | N(5)-C(30)-H(30B)   | 109.3     |
| C(22)-C(23)-H(23A)  | 113.9     | C(31)-C(30)-H(30B)  | 109.3     |
| Ir(1)-C(23)-H(23A)  | 113.9     | H(30A)-C(30)-H(30B) | 107.9     |
| C(23)-C(24)-C(25)   | 125.0(12) | N(6)-C(31)-C(32)    | 109.2(8)  |
| C(23)-C(24)-Ir(1)   | 69.8(6)   | N(6)-C(31)-C(30)    | 122.8(9)  |
| C(25)-C(24)-Ir(1)   | 111.8(8)  | C(32)-C(31)-C(30)   | 127.4(9)  |
| C(23)-C(24)-H(24A)  | 114.0     | C(33)-C(32)-C(31)   | 102.6(8)  |
| C(25)-C(24)-H(24A)  | 114.0     | C(33)-C(32)-H(32A)  | 128.7     |
| Ir(1)-C(24)-H(24A)  | 114.0     | C(31)-C(32)-H(32A)  | 128.7     |
| C(26)-C(25)-C(24)   | 113.7(10) | N(7)-C(33)-C(32)    | 110.8(9)  |
| C(26)-C(25)-H(25A)  | 108.8     | N(7)-C(33)-C(34)    | 123.0(10) |
| C(24)-C(25)-H(25A)  | 108.8     | C(32)-C(33)-C(34)   | 126.3(9)  |
| C(26)-C(25)-H(25B)  | 108.8     | C(33)-C(34)-N(8)    | 113.0(8)  |
| C(24)-C(25)-H(25B)  | 108.8     | C(33)-C(34)-H(34A)  | 109.0     |
| H(25A)-C(25)-H(25B) | 107.7     | N(8)-C(34)-H(34A)   | 109.0     |
| C(25)-C(26)-C(19)   | 115.1(12) | C(33)-C(34)-H(34B)  | 109.0     |
| C(25)-C(26)-H(26A)  | 108.5     | N(8)-C(34)-H(34B)   | 109.0     |
| C(19)-C(26)-H(26A)  | 108.5     | H(34A)-C(34)-H(34B) | 107.8     |
| C(25)-C(26)-H(26B)  | 108.5     | C(36)-C(35)-N(8)    | 104.8(9)  |
| C(19)-C(26)-H(26B)  | 108.5     | C(36)-C(35)-H(35A)  | 127.6     |
| H(26A)-C(26)-H(26B) | 107.5     | N(8)-C(35)-H(35A)   | 127.6     |
| N(5)-C(27)-N(4)     | 103.1(8)  | C(35)-C(36)-N(9)    | 108.8(9)  |
| N(5)-C(27)-Ir(2)    | 119.4(6)  | C(35)-C(36)-H(36A)  | 125.6     |
| N(4)-C(27)-Ir(2)    | 137.4(7)  | N(9)-C(36)-H(36A)   | 125.6     |
| C(29)-C(28)-N(4)    | 107.1(10) | N(8)-C(37)-N(9)     | 103.4(8)  |
| C(29)-C(28)-H(28A)  | 126.5     | N(8)-C(37)-Ir(3)    | 121.7(7)  |
| N(4)-C(28)-H(28A)   | 126.5     | N(9)-C(37)-Ir(3)    | 134.9(7)  |
| C(28)-C(29)-N(5)    | 106.8(9)  | C(43)-C(38)-C(39)   | 121.8(11) |
| C(28)-C(29)-H(29A)  | 126.6     | C(43)-C(38)-N(4)    | 119.0(10) |
| N(5)-C(29)-H(29A)   | 126.6     | C(39)-C(38)-N(4)    | 118.5(11) |
| N(5)-C(30)-C(31)    | 111.7(9)  | C(44)-C(39)-C(38)   | 123.7(14) |
| N(5)-C(30)-H(30A)   | 109.3     | C(44)-C(39)-C(40)   | 125.0(14) |

Electronic Supplementary Information for Dalton Transactions  
This journal is © The Royal Society of Chemistry 2007

|                      |           |                      |           |
|----------------------|-----------|----------------------|-----------|
| C(38)-C(39)-C(40)    | 110.7(12) | H(45E)-C(45')-H(45F) | 109.5     |
| C(41)-C(40)-C(39)    | 126.1(14) | H(46D)-C(46')-H(46E) | 109.5     |
| C(41)-C(40)-H(40A)   | 117.0     | H(46D)-C(46')-H(46F) | 109.5     |
| C(39)-C(40)-H(40A)   | 117.0     | H(46E)-C(46')-H(46F) | 109.5     |
| C(40)-C(41)-C(42)    | 119.5(13) | C(49)-C(47)-C(43)    | 116.3(11) |
| C(40)-C(41)-H(41A)   | 120.3     | C(49)-C(47)-C(48)    | 112.5(10) |
| C(42)-C(41)-H(41A)   | 120.3     | C(43)-C(47)-C(48)    | 105.9(9)  |
| C(41)-C(42)-C(43)    | 119.3(13) | C(49)-C(47)-H(47A)   | 107.3     |
| C(41)-C(42)-H(42A)   | 120.3     | C(43)-C(47)-H(47A)   | 107.3     |
| C(43)-C(42)-H(42A)   | 120.3     | C(48)-C(47)-H(47A)   | 107.3     |
| C(38)-C(43)-C(42)    | 121.6(11) | C(47)-C(48)-H(48A)   | 109.5     |
| C(38)-C(43)-C(47)    | 123.0(10) | C(47)-C(48)-H(48B)   | 109.5     |
| C(42)-C(43)-C(47)    | 114.7(10) | H(48A)-C(48)-H(48B)  | 109.5     |
| C(39)-C(44)-C(45)    | 121.5(18) | C(47)-C(48)-H(48C)   | 109.5     |
| C(39)-C(44)-C(46)    | 109(2)    | H(48A)-C(48)-H(48C)  | 109.5     |
| C(45)-C(44)-C(46)    | 113.7(15) | H(48B)-C(48)-H(48C)  | 109.5     |
| C(39)-C(44)-H(44)    | 103.5     | C(47)-C(49)-H(49A)   | 109.5     |
| C(45)-C(44)-H(44)    | 103.5     | C(47)-C(49)-H(49B)   | 109.5     |
| C(46)-C(44)-H(44)    | 103.5     | H(49A)-C(49)-H(49B)  | 109.5     |
| C(44)-C(45)-H(45A)   | 109.5     | C(47)-C(49)-H(49C)   | 109.5     |
| C(44)-C(45)-H(45B)   | 109.5     | H(49A)-C(49)-H(49C)  | 109.5     |
| H(45A)-C(45)-H(45B)  | 109.5     | H(49B)-C(49)-H(49C)  | 109.5     |
| C(44)-C(45)-H(45C)   | 109.5     | C(55)-C(50)-C(51)    | 124.8(10) |
| H(45A)-C(45)-H(45C)  | 109.5     | C(55)-C(50)-N(9)     | 118.6(10) |
| H(45B)-C(45)-H(45C)  | 109.5     | C(51)-C(50)-N(9)     | 116.6(9)  |
| C(44)-C(46)-H(46A)   | 109.5     | C(52)-C(51)-C(50)    | 116.8(11) |
| C(44)-C(46)-H(46B)   | 109.5     | C(52)-C(51)-C(56)    | 120.0(10) |
| H(46A)-C(46)-H(46B)  | 109.5     | C(50)-C(51)-C(56)    | 123.2(9)  |
| C(44)-C(46)-H(46C)   | 109.5     | C(51)-C(52)-C(53)    | 119.5(12) |
| H(46A)-C(46)-H(46C)  | 109.5     | C(51)-C(52)-H(52A)   | 120.3     |
| H(46B)-C(46)-H(46C)  | 109.5     | C(53)-C(52)-H(52A)   | 120.3     |
| H(45D)-C(45')-H(45E) | 109.5     | C(54)-C(53)-C(52)    | 122.8(12) |
| H(45D)-C(45')-H(45F) | 109.5     | C(54)-C(53)-H(53A)   | 118.6     |

Electronic Supplementary Information for Dalton Transactions  
This journal is © The Royal Society of Chemistry 2007

|                     |           |                     |           |
|---------------------|-----------|---------------------|-----------|
| C(52)-C(53)-H(53A)  | 118.6     | H(60A)-C(60)-H(60B) | 109.5     |
| C(53)-C(54)-C(55)   | 119.6(12) | C(59)-C(60)-H(60C)  | 109.5     |
| C(53)-C(54)-H(54A)  | 120.2     | H(60A)-C(60)-H(60C) | 109.5     |
| C(55)-C(54)-H(54A)  | 120.2     | H(60B)-C(60)-H(60C) | 109.5     |
| C(50)-C(55)-C(54)   | 116.5(10) | C(59)-C(61)-H(61A)  | 109.5     |
| C(50)-C(55)-C(59)   | 124.1(10) | C(59)-C(61)-H(61B)  | 109.5     |
| C(54)-C(55)-C(59)   | 119.5(11) | H(61A)-C(61)-H(61B) | 109.5     |
| C(51)-C(56)-C(57)   | 113.7(12) | C(59)-C(61)-H(61C)  | 109.5     |
| C(51)-C(56)-C(58)   | 114.5(10) | H(61A)-C(61)-H(61C) | 109.5     |
| C(57)-C(56)-C(58)   | 105.7(10) | H(61B)-C(61)-H(61C) | 109.5     |
| C(51)-C(56)-H(56A)  | 107.5     | C(63)-C(62)-C(69)   | 126.4(13) |
| C(57)-C(56)-H(56A)  | 107.5     | C(63)-C(62)-Ir(2)   | 71.3(7)   |
| C(58)-C(56)-H(56A)  | 107.5     | C(69)-C(62)-Ir(2)   | 111.6(9)  |
| C(56)-C(57)-H(57A)  | 109.5     | C(63)-C(62)-H(62A)  | 113.3     |
| C(56)-C(57)-H(57B)  | 109.5     | C(69)-C(62)-H(62A)  | 113.3     |
| H(57A)-C(57)-H(57B) | 109.5     | Ir(2)-C(62)-H(62A)  | 113.3     |
| C(56)-C(57)-H(57C)  | 109.5     | C(62)-C(63)-C(64)   | 122.1(12) |
| H(57A)-C(57)-H(57C) | 109.5     | C(62)-C(63)-Ir(2)   | 70.4(7)   |
| H(57B)-C(57)-H(57C) | 109.5     | C(64)-C(63)-Ir(2)   | 111.5(8)  |
| C(56)-C(58)-H(58A)  | 109.5     | C(62)-C(63)-H(63A)  | 115.0     |
| C(56)-C(58)-H(58B)  | 109.5     | C(64)-C(63)-H(63A)  | 115.0     |
| H(58A)-C(58)-H(58B) | 109.5     | Ir(2)-C(63)-H(63A)  | 115.0     |
| C(56)-C(58)-H(58C)  | 109.5     | C(65)-C(64)-C(63)   | 119.4(11) |
| H(58A)-C(58)-H(58C) | 109.5     | C(65)-C(64)-H(64A)  | 107.5     |
| H(58B)-C(58)-H(58C) | 109.5     | C(63)-C(64)-H(64A)  | 107.5     |
| C(55)-C(59)-C(60)   | 114.1(12) | C(65)-C(64)-H(64B)  | 107.5     |
| C(55)-C(59)-C(61)   | 109.0(10) | C(63)-C(64)-H(64B)  | 107.5     |
| C(60)-C(59)-C(61)   | 112.6(12) | H(64A)-C(64)-H(64B) | 107.0     |
| C(55)-C(59)-H(59A)  | 106.9     | C(64)-C(65)-C(66)   | 116.8(11) |
| C(60)-C(59)-H(59A)  | 106.9     | C(64)-C(65)-H(65A)  | 108.1     |
| C(61)-C(59)-H(59A)  | 106.9     | C(66)-C(65)-H(65A)  | 108.1     |
| C(59)-C(60)-H(60A)  | 109.5     | C(64)-C(65)-H(65B)  | 108.1     |
| C(59)-C(60)-H(60B)  | 109.5     | C(66)-C(65)-H(65B)  | 108.1     |

|                     |           |                     |           |
|---------------------|-----------|---------------------|-----------|
| H(65A)-C(65)-H(65B) | 107.3     | C(72)-C(71)-Ir(3)   | 111.3(10) |
| C(67)-C(66)-C(65)   | 127.3(12) | C(70)-C(71)-H(71A)  | 111.7     |
| C(67)-C(66)-Ir(2)   | 68.7(6)   | C(72)-C(71)-H(71A)  | 111.7     |
| C(65)-C(66)-Ir(2)   | 108.9(8)  | Ir(3)-C(71)-H(71A)  | 111.7     |
| C(67)-C(66)-H(66A)  | 114.0     | C(73)-C(72)-C(71)   | 113.1(16) |
| C(65)-C(66)-H(66A)  | 114.0     | C(73)-C(72)-H(72A)  | 109.0     |
| Ir(2)-C(66)-H(66A)  | 114.0     | C(71)-C(72)-H(72A)  | 109.0     |
| C(66)-C(67)-C(68)   | 123.4(12) | C(73)-C(72)-H(72B)  | 109.0     |
| C(66)-C(67)-Ir(2)   | 74.4(7)   | C(71)-C(72)-H(72B)  | 109.0     |
| C(68)-C(67)-Ir(2)   | 107.7(9)  | H(72A)-C(72)-H(72B) | 107.8     |
| C(66)-C(67)-H(67A)  | 114.6     | C(72)-C(73)-C(74)   | 116.9(13) |
| C(68)-C(67)-H(67A)  | 114.6     | C(72)-C(73)-H(73A)  | 108.1     |
| Ir(2)-C(67)-H(67A)  | 114.6     | C(74)-C(73)-H(73A)  | 108.1     |
| C(69)-C(68)-C(67)   | 117.0(12) | C(72)-C(73)-H(73B)  | 108.1     |
| C(69)-C(68)-H(68A)  | 108.1     | C(74)-C(73)-H(73B)  | 108.1     |
| C(67)-C(68)-H(68A)  | 108.1     | H(73A)-C(73)-H(73B) | 107.3     |
| C(69)-C(68)-H(68B)  | 108.1     | C(75)-C(74)-C(73)   | 118.6(12) |
| C(67)-C(68)-H(68B)  | 108.1     | C(75)-C(74)-Ir(3)   | 71.3(7)   |
| H(68A)-C(68)-H(68B) | 107.3     | C(73)-C(74)-Ir(3)   | 109.4(9)  |
| C(68)-C(69)-C(62)   | 117.4(11) | C(75)-C(74)-H(74A)  | 116.4     |
| C(68)-C(69)-H(69A)  | 107.9     | C(73)-C(74)-H(74A)  | 116.4     |
| C(62)-C(69)-H(69A)  | 107.9     | Ir(3)-C(74)-H(74A)  | 116.4     |
| C(68)-C(69)-H(69B)  | 107.9     | C(74)-C(75)-C(76)   | 128.2(13) |
| C(62)-C(69)-H(69B)  | 107.9     | C(74)-C(75)-Ir(3)   | 70.5(7)   |
| H(69A)-C(69)-H(69B) | 107.2     | C(76)-C(75)-Ir(3)   | 112.4(9)  |
| C(71)-C(70)-C(77)   | 118.3(12) | C(74)-C(75)-H(75A)  | 112.6     |
| C(71)-C(70)-Ir(3)   | 70.1(7)   | C(76)-C(75)-H(75A)  | 112.6     |
| C(77)-C(70)-Ir(3)   | 112.2(8)  | Ir(3)-C(75)-H(75A)  | 112.6     |
| C(71)-C(70)-H(70A)  | 116.0     | C(77)-C(76)-C(75)   | 110.6(12) |
| C(77)-C(70)-H(70A)  | 116.0     | C(77)-C(76)-H(76A)  | 109.5     |
| Ir(3)-C(70)-H(70A)  | 116.0     | C(75)-C(76)-H(76A)  | 109.5     |
| C(70)-C(71)-C(72)   | 130.0(16) | C(77)-C(76)-H(76B)  | 109.5     |
| C(70)-C(71)-Ir(3)   | 73.5(7)   | C(75)-C(76)-H(76B)  | 109.5     |

Electronic Supplementary Information for Dalton Transactions  
This journal is © The Royal Society of Chemistry 2007

|                     |           |                     |       |
|---------------------|-----------|---------------------|-------|
| H(76A)-C(76)-H(76B) | 108.1     | C(76)-C(77)-H(77B)  | 108.1 |
| C(76)-C(77)-C(70)   | 116.8(11) | C(70)-C(77)-H(77B)  | 108.1 |
| C(76)-C(77)-H(77A)  | 108.1     | H(77A)-C(77)-H(77B) | 107.3 |
| C(70)-C(77)-H(77A)  | 108.1     |                     |       |

---

Symmetry transformations used to generate equivalent atoms:

#1 -x+1,y,-z+1

Table 4. Anisotropic displacement parameters ( $\text{\AA}^2 \times 10^3$ ). The anisotropic displacement factor exponent takes the form:  $-2\pi^2 [ h^2 a^{*2} U_{11} + \dots + 2 h k a^* b^* U_{12} ]$

|      | $U_{11}$ | $U_{22}$ | $U_{33}$ | $U_{23}$ | $U_{13}$ | $U_{12}$ |
|------|----------|----------|----------|----------|----------|----------|
| Ir1  | 33(1)    | 33(1)    | 33(1)    | -2(1)    | 0(1)     | 0(1)     |
| Ir2  | 31(1)    | 30(1)    | 36(1)    | 1(1)     | -2(1)    | 1(1)     |
| Ir3  | 39(1)    | 29(1)    | 39(1)    | 1(1)     | 4(1)     | 0(1)     |
| P1   | 41(1)    | 39(2)    | 46(2)    | -4(1)    | 2(1)     | 4(1)     |
| F1   | 91(6)    | 65(5)    | 90(6)    | -35(4)   | -41(5)   | 6(4)     |
| F2   | 104(7)   | 89(6)    | 91(6)    | 23(5)    | 50(5)    | 1(5)     |
| F3   | 62(4)    | 71(5)    | 68(5)    | -15(4)   | -16(3)   | 11(4)    |
| F4   | 104(6)   | 72(5)    | 66(5)    | 12(4)    | 24(4)    | -6(5)    |
| F5   | 45(4)    | 61(5)    | 120(7)   | -23(4)   | -20(4)   | 13(3)    |
| F6   | 70(5)    | 70(5)    | 84(5)    | -10(4)   | 3(4)     | 34(4)    |
| P2   | 60(4)    | 34(2)    | 41(3)    | 12(5)    | 12(3)    | 3(5)     |
| F7   | 94(9)    | 128(13)  | 66(10)   | 52(8)    | 1(7)     | 21(9)    |
| F8   | 121(11)  | 55(7)    | 73(10)   | -14(7)   | 19(8)    | -42(7)   |
| F9   | 76(7)    | 73(9)    | 54(5)    | 5(11)    | 17(5)    | -15(12)  |
| F10  | 121(11)  | 55(7)    | 73(10)   | -14(7)   | 19(8)    | -42(7)   |
| F11  | 94(9)    | 128(13)  | 66(10)   | 52(8)    | 1(7)     | 21(9)    |
| F12  | 76(7)    | 73(9)    | 54(5)    | 5(11)    | 17(5)    | -15(12)  |
| P2'  | 60(4)    | 34(2)    | 41(3)    | 12(5)    | 12(3)    | 3(5)     |
| F7'  | 94(9)    | 128(13)  | 66(10)   | 52(8)    | 1(7)     | 21(9)    |
| F8'  | 121(11)  | 55(7)    | 73(10)   | -14(7)   | 19(8)    | -42(7)   |
| F9'  | 76(7)    | 73(9)    | 54(5)    | 5(11)    | 17(5)    | -15(12)  |
| F10' | 121(11)  | 55(7)    | 73(10)   | -14(7)   | 19(8)    | -42(7)   |
| F11' | 94(9)    | 128(13)  | 66(10)   | 52(8)    | 1(7)     | 21(9)    |
| F12' | 76(7)    | 73(9)    | 54(5)    | 5(11)    | 17(5)    | -15(12)  |
| N1   | 40(4)    | 38(5)    | 30(4)    | 8(4)     | 0(3)     | 0(4)     |
| N2   | 57(5)    | 24(4)    | 36(5)    | -2(3)    | -3(4)    | 5(4)     |
| N3   | 44(4)    | 31(4)    | 32(4)    | -5(4)    | 2(3)     | 0(4)     |
| N4   | 53(5)    | 46(5)    | 35(4)    | -3(4)    | 1(4)     | 4(4)     |



Electronic Supplementary Information for Dalton Transactions  
This journal is © The Royal Society of Chemistry 2007

|      |         |         |         |        |        |         |
|------|---------|---------|---------|--------|--------|---------|
| N5   | 36(4)   | 37(5)   | 36(4)   | -8(3)  | -6(3)  | -4(3)   |
| N6   | 28(4)   | 32(4)   | 44(5)   | -6(4)  | 0(3)   | -6(3)   |
| N7   | 28(4)   | 36(4)   | 38(4)   | 8(4)   | 1(3)   | 0(3)    |
| N8   | 33(4)   | 55(6)   | 29(4)   | 3(4)   | 7(3)   | 11(4)   |
| N9   | 50(5)   | 23(4)   | 38(5)   | -6(3)  | -7(4)  | -5(3)   |
| C1   | 55(6)   | 35(5)   | 13(4)   | -4(4)  | -1(4)  | -5(5)   |
| C2   | 52(7)   | 98(12)  | 34(6)   | -18(6) | 4(5)   | -13(7)  |
| C3   | 77(8)   | 39(6)   | 42(6)   | -5(5)  | 13(6)  | 2(6)    |
| C4   | 50(5)   | 45(5)   | 43(6)   | 6(5)   | 0(4)   | 3(4)    |
| C5   | 61(7)   | 99(9)   | 56(8)   | 25(7)  | 6(5)   | 38(7)   |
| C6   | 111(12) | 124(13) | 103(13) | 48(11) | 32(9)  | 86(12)  |
| C7   | 169(17) | 73(10)  | 93(12)  | 36(9)  | 41(11) | 69(10)  |
| C8   | 74(8)   | 48(6)   | 90(10)  | 24(6)  | 7(6)   | 0(5)    |
| C9   | 47(5)   | 45(5)   | 32(5)   | 8(4)   | -5(4)  | 4(4)    |
| C10  | 47(6)   | 155(14) | 56(8)   | 38(8)  | 0(5)   | 53(8)   |
| C11  | 136(19) | 230(30) | 66(13)  | 24(13) | 39(12) | 115(18) |
| C12  | 48(12)  | 170(20) | 108(14) | 48(12) | 14(11) | 11(12)  |
| C10' | 47(6)   | 155(14) | 56(8)   | 38(8)  | 0(5)   | 53(8)   |
| C11' | 136(19) | 230(30) | 66(13)  | 24(13) | 39(12) | 115(18) |
| C12' | 48(12)  | 170(20) | 108(14) | 48(12) | 14(11) | 11(12)  |
| C13  | 56(6)   | 73(10)  | 47(6)   | 18(5)  | 5(5)   | 12(6)   |
| C14  | 53(8)   | 200(20) | 46(12)  | 71(11) | 5(8)   | -6(10)  |
| C15  | 64(13)  | 106(14) | 51(7)   | 31(7)  | 27(7)  | 54(10)  |
| C13' | 56(6)   | 73(10)  | 47(6)   | 18(5)  | 5(5)   | 12(6)   |
| C14' | 53(8)   | 200(20) | 46(12)  | 71(11) | 5(8)   | -6(10)  |
| C15' | 64(13)  | 106(14) | 51(7)   | 31(7)  | 27(7)  | 54(10)  |
| C16  | 111(12) | 67(9)   | 41(7)   | 13(6)  | -1(7)  | 0(8)    |
| C17  | 75(7)   | 29(5)   | 31(5)   | -3(4)  | -12(5) | 23(5)   |
| C18  | 93(13)  | 29(8)   | 37(8)   | 0      | 4(8)   | 0       |
| C19  | 63(6)   | 55(7)   | 59(7)   | -3(5)  | 8(6)   | -32(5)  |
| C20  | 42(5)   | 91(9)   | 42(5)   | -13(6) | 19(4)  | -35(5)  |
| C21  | 39(6)   | 230(20) | 58(8)   | -23(9) | 16(5)  | -40(9)  |
| C22  | 36(5)   | 173(18) | 65(7)   | -21(8) | -17(5) | -13(8)  |

Electronic Supplementary Information for Dalton Transactions  
This journal is © The Royal Society of Chemistry 2007

|      |         |        |         |         |         |         |
|------|---------|--------|---------|---------|---------|---------|
| C23  | 41(5)   | 87(8)  | 34(5)   | -11(6)  | -4(4)   | 1(5)    |
| C24  | 63(6)   | 45(5)  | 32(5)   | -13(4)  | 17(5)   | -29(4)  |
| C25  | 110(11) | 48(6)  | 75(7)   | -17(6)  | 25(8)   | -45(7)  |
| C26  | 126(13) | 29(6)  | 85(8)   | -3(5)   | 28(9)   | -29(7)  |
| C27  | 37(3)   | 23(3)  | 27(3)   | -8(3)   | 8(3)    | -1(3)   |
| C28  | 41(6)   | 77(9)  | 46(6)   | -8(6)   | -9(5)   | 15(6)   |
| C29  | 36(5)   | 65(8)  | 44(6)   | -5(5)   | -7(5)   | -5(5)   |
| C30  | 50(6)   | 51(7)  | 33(5)   | 13(5)   | -7(4)   | -15(5)  |
| C31  | 27(5)   | 25(5)  | 57(6)   | -6(4)   | -2(4)   | -1(4)   |
| C32  | 32(5)   | 42(6)  | 42(6)   | 2(4)    | 2(4)    | -13(4)  |
| C33  | 37(5)   | 56(6)  | 45(6)   | 7(5)    | 6(4)    | -8(5)   |
| C34  | 34(5)   | 52(7)  | 49(6)   | -5(5)   | 4(4)    | -1(4)   |
| C35  | 42(6)   | 47(7)  | 55(7)   | 4(5)    | 21(5)   | -7(5)   |
| C36  | 67(7)   | 44(6)  | 27(5)   | 10(5)   | 23(5)   | -4(6)   |
| C37  | 37(3)   | 23(3)  | 27(3)   | -8(3)   | 8(3)    | -1(3)   |
| C38  | 52(6)   | 50(6)  | 20(5)   | 4(4)    | -3(4)   | -3(5)   |
| C39  | 102(10) | 44(7)  | 49(7)   | 4(6)    | -6(7)   | 26(7)   |
| C40  | 147(16) | 54(9)  | 67(10)  | 13(7)   | -3(10)  | -51(10) |
| C41  | 107(12) | 64(9)  | 55(8)   | 26(8)   | 18(8)   | -28(9)  |
| C42  | 64(7)   | 58(8)  | 36(6)   | -1(5)   | 7(5)    | 2(6)    |
| C43  | 42(5)   | 48(6)  | 27(5)   | 1(4)    | 5(4)    | 1(5)    |
| C44  | 130(11) | 30(6)  | 84(10)  | 5(6)    | 21(8)   | 26(6)   |
| C45  | 144(17) | 20(9)  | 62(9)   | 23(8)   | 16(12)  | 19(9)   |
| C46  | 240(20) | 90(20) | 108(18) | -40(20) | -79(18) | 80(20)  |
| C44' | 130(11) | 30(6)  | 84(10)  | 5(6)    | 21(8)   | 26(6)   |
| C45' | 144(17) | 20(9)  | 62(9)   | 23(8)   | 16(12)  | 19(9)   |
| C46' | 240(20) | 90(20) | 108(18) | -40(20) | -79(18) | 80(20)  |
| C47  | 52(6)   | 37(6)  | 47(6)   | -12(5)  | 12(5)   | -3(5)   |
| C48  | 78(9)   | 53(8)  | 68(9)   | -13(7)  | 9(7)    | 14(7)   |
| C49  | 63(8)   | 68(9)  | 90(11)  | 17(8)   | -15(7)  | 19(7)   |
| C50  | 39(5)   | 46(6)  | 44(6)   | 3(5)    | 5(4)    | -6(5)   |
| C51  | 57(6)   | 39(6)  | 32(5)   | 2(4)    | 6(4)    | -21(5)  |
| C52  | 61(7)   | 61(8)  | 37(6)   | -2(5)   | -4(5)   | -15(6)  |

|     |         |         |         |         |        |        |
|-----|---------|---------|---------|---------|--------|--------|
| C53 | 73(9)   | 73(9)   | 58(8)   | -2(7)   | -11(7) | -25(7) |
| C54 | 35(6)   | 98(10)  | 47(7)   | -8(7)   | 2(5)   | 1(6)   |
| C55 | 56(6)   | 28(5)   | 40(6)   | 4(4)    | -4(5)  | -6(4)  |
| C56 | 65(7)   | 41(6)   | 57(7)   | -18(5)  | 26(6)  | -16(5) |
| C57 | 125(13) | 65(9)   | 55(8)   | -8(7)   | 30(8)  | -20(9) |
| C58 | 89(10)  | 72(10)  | 98(11)  | -42(8)  | 57(9)  | -36(8) |
| C59 | 51(6)   | 66(9)   | 63(7)   | -21(6)  | -5(5)  | 26(6)  |
| C60 | 62(8)   | 150(17) | 47(7)   | -28(9)  | -3(6)  | 27(9)  |
| C61 | 96(10)  | 29(6)   | 114(12) | -23(7)  | 45(9)  | 13(7)  |
| C62 | 37(6)   | 59(6)   | 78(8)   | 2(5)    | 12(5)  | 14(5)  |
| C63 | 33(5)   | 64(6)   | 48(5)   | 3(5)    | 0(4)   | -6(5)  |
| C64 | 52(7)   | 118(13) | 61(7)   | 7(8)    | -2(5)  | -36(8) |
| C65 | 46(7)   | 188(18) | 69(6)   | -44(11) | 8(6)   | -46(9) |
| C66 | 22(4)   | 85(7)   | 43(6)   | -15(6)  | -5(4)  | 11(5)  |
| C67 | 51(6)   | 50(6)   | 64(7)   | 18(5)   | -4(5)  | 28(5)  |
| C68 | 89(10)  | 62(8)   | 117(11) | 27(7)   | 31(9)  | 52(8)  |
| C69 | 74(9)   | 66(8)   | 101(10) | -3(7)   | 18(8)  | 40(7)  |
| C70 | 74(6)   | 29(5)   | 43(6)   | 7(4)    | 3(5)   | -12(4) |
| C71 | 86(7)   | 32(5)   | 48(6)   | 20(5)   | -1(6)  | 3(5)   |
| C72 | 190(20) | 76(11)  | 81(9)   | 31(8)   | 38(10) | 68(12) |
| C73 | 144(15) | 31(7)   | 138(12) | -6(6)   | 39(10) | 41(9)  |
| C74 | 110(8)  | 46(7)   | 42(6)   | -12(5)  | 41(6)  | -6(6)  |
| C75 | 95(7)   | 30(6)   | 51(6)   | 5(5)    | 1(6)   | -24(5) |
| C76 | 82(9)   | 95(12)  | 82(8)   | 1(8)    | 1(7)   | -53(9) |
| C77 | 99(10)  | 76(10)  | 64(7)   | -1(7)   | 15(7)  | -51(8) |

---

Table 5. Torsion angles [°].

|                 |            |               |            |
|-----------------|------------|---------------|------------|
| C1-Ir1-N3-C17   | 46.1(8)    | C75-Ir3-N7-N6 | 56.0(19)   |
| C19-Ir1-N3-C17  | 133.5(17)  | C71-Ir3-N7-N6 | -46.8(8)   |
| C20-Ir1-N3-C17  | -39.6(13)  | C70-Ir3-N7-N6 | -10.6(8)   |
| C23-Ir1-N3-C17  | -104.4(8)  | C4-N1-C1-N2   | -176.0(9)  |
| C24-Ir1-N3-C17  | -141.3(8)  | C2-N1-C1-N2   | -2.0(11)   |
| C1-Ir1-N3-N3#1  | -149.6(10) | C4-N1-C1-Ir1  | 6.5(17)    |
| C19-Ir1-N3-N3#1 | -62(2)     | C2-N1-C1-Ir1  | -179.5(9)  |
| C20-Ir1-N3-N3#1 | 124.7(11)  | C3-N2-C1-N1   | -0.3(12)   |
| C23-Ir1-N3-N3#1 | 59.9(10)   | C16-N2-C1-N1  | -177.9(10) |
| C24-Ir1-N3-N3#1 | 23.1(10)   | C3-N2-C1-Ir1  | 177.8(7)   |
| C27-Ir2-N6-N7   | 157.4(9)   | C16-N2-C1-Ir1 | 0.2(15)    |
| C67-Ir2-N6-N7   | -51.9(9)   | N3-Ir1-C1-N1  | 137.4(11)  |
| C62-Ir2-N6-N7   | -118.5(12) | C19-Ir1-C1-N1 | -29.2(12)  |
| C63-Ir2-N6-N7   | 53.8(18)   | C20-Ir1-C1-N1 | -65.9(12)  |
| C66-Ir2-N6-N7   | -15.2(9)   | C23-Ir1-C1-N1 | -146.2(11) |
| C27-Ir2-N6-C31  | -43.8(7)   | C24-Ir1-C1-N1 | 42(4)      |
| C67-Ir2-N6-C31  | 106.8(8)   | N3-Ir1-C1-N2  | -39.9(8)   |
| C62-Ir2-N6-C31  | 40.3(15)   | C19-Ir1-C1-N2 | 153.5(9)   |
| C63-Ir2-N6-C31  | -147.4(12) | C20-Ir1-C1-N2 | 116.8(9)   |
| C66-Ir2-N6-C31  | 143.5(8)   | C23-Ir1-C1-N2 | 36.5(13)   |
| C31-N6-N7-C33   | 1.5(11)    | C24-Ir1-C1-N2 | -135(3)    |
| Ir2-N6-N7-C33   | 161.8(8)   | C1-N1-C2-C3   | 3.8(13)    |
| C31-N6-N7-Ir3   | 156.4(6)   | C4-N1-C2-C3   | 178.3(10)  |
| Ir2-N6-N7-Ir3   | -43.3(11)  | N1-C2-C3-N2   | -3.8(13)   |
| C37-Ir3-N7-C33  | -47.8(8)   | C1-N2-C3-C2   | 2.6(14)    |
| C74-Ir3-N7-C33  | 39.1(13)   | C16-N2-C3-C2  | -180.0(12) |
| C75-Ir3-N7-C33  | -151.2(16) | C1-N1-C4-C5   | -80.0(11)  |
| C71-Ir3-N7-C33  | 106.0(8)   | C2-N1-C4-C5   | 106.7(9)   |
| C70-Ir3-N7-C33  | 142.2(8)   | C1-N1-C4-C9   | 97.2(11)   |
| C37-Ir3-N7-N6   | 159.4(7)   | C2-N1-C4-C9   | -76.1(11)  |
| C74-Ir3-N7-N6   | -113.7(10) | N1-C4-C5-C6   | 177.2(8)   |

Electronic Supplementary Information for Dalton Transactions  
This journal is © The Royal Society of Chemistry 2007

|                   |            |                 |            |
|-------------------|------------|-----------------|------------|
| C9-C4-C5-C6       | 0.0        | C23-Ir1-C19-C20 | 63.6(8)    |
| N1-C4-C5-C10      | -6.5(11)   | C24-Ir1-C19-C20 | 97.8(8)    |
| C9-C4-C5-C10      | 176.4(10)  | C1-Ir1-C19-C26  | 154.0(10)  |
| C4-C5-C6-C7       | 0.0        | N3-Ir1-C19-C26  | 68(2)      |
| C10-C5-C6-C7      | -176.5(10) | C20-Ir1-C19-C26 | -116.8(13) |
| C5-C6-C7-C8       | 0.0        | C23-Ir1-C19-C26 | -53.2(11)  |
| C6-C7-C8-C9       | 0.0        | C24-Ir1-C19-C26 | -19.0(10)  |
| C7-C8-C9-C4       | 0.0        | C26-C19-C20-C21 | -4.6(19)   |
| C7-C8-C9-C13      | -179.6(9)  | Ir1-C19-C20-C21 | -105.8(13) |
| N1-C4-C9-C8       | -177.1(9)  | C26-C19-C20-Ir1 | 101.2(11)  |
| C5-C4-C9-C8       | 0.0        | C1-Ir1-C20-C19  | 93.3(8)    |
| N1-C4-C9-C13      | 2.4(10)    | N3-Ir1-C20-C19  | 177.3(8)   |
| C5-C4-C9-C13      | 179.5(9)   | C23-Ir1-C20-C19 | -116.9(8)  |
| C4-C5-C10-C12     | -78.9(15)  | C24-Ir1-C20-C19 | -79.7(8)   |
| C6-C5-C10-C12     | 97.6(14)   | C1-Ir1-C20-C21  | -144.2(13) |
| C4-C5-C10-C11     | 158.9(12)  | N3-Ir1-C20-C21  | -60.2(16)  |
| C6-C5-C10-C11     | -24.7(15)  | C19-Ir1-C20-C21 | 122.5(15)  |
| C8-C9-C13-C14     | 68(4)      | C23-Ir1-C20-C21 | 5.6(12)    |
| C4-C9-C13-C14     | -112(4)    | C24-Ir1-C20-C21 | 42.8(13)   |
| C8-C9-C13-C15     | -79(5)     | C19-C20-C21-C22 | 95(2)      |
| C4-C9-C13-C15     | 102(5)     | Ir1-C20-C21-C22 | 10.9(19)   |
| C3-N2-C16-C17     | -123.8(13) | C20-C21-C22-C23 | -30(2)     |
| C1-N2-C16-C17     | 53.4(17)   | C21-C22-C23-C24 | -47.6(19)  |
| N3#1-N3-C17-C18   | 1.0(12)    | C21-C22-C23-Ir1 | 35.0(19)   |
| Ir1-N3-C17-C18    | 168.5(5)   | C1-Ir1-C23-C24  | -178.3(7)  |
| N3#1-N3-C17-C16   | -175.7(11) | N3-Ir1-C23-C24  | -102.6(6)  |
| Ir1-N3-C17-C16    | -8.2(15)   | C19-Ir1-C23-C24 | 65.9(7)    |
| N2-C16-C17-N3     | -49.3(18)  | C20-Ir1-C23-C24 | 98.6(7)    |
| N2-C16-C17-C18    | 134.5(11)  | C1-Ir1-C23-C22  | 60.7(17)   |
| N3-C17-C18-C17#1  | -0.4(5)    | N3-Ir1-C23-C22  | 136.4(13)  |
| C16-C17-C18-C17#1 | 176.2(15)  | C19-Ir1-C23-C22 | -55.1(13)  |
| C1-Ir1-C19-C20    | -89.2(7)   | C20-Ir1-C23-C22 | -22.4(13)  |
| N3-Ir1-C19-C20    | -175.4(14) | C24-Ir1-C23-C22 | -121.0(15) |

Electronic Supplementary Information for Dalton Transactions  
This journal is © The Royal Society of Chemistry 2007

|                 |            |                 |            |
|-----------------|------------|-----------------|------------|
| C22-C23-C24-C25 | 0.5(18)    | C63-Ir2-C27-N4  | 23.3(11)   |
| Ir1-C23-C24-C25 | -103.0(11) | C66-Ir2-C27-N4  | -50(3)     |
| C22-C23-C24-Ir1 | 103.5(11)  | C27-N4-C28-C29  | 0.4(13)    |
| C1-Ir1-C24-C23  | 173(3)     | C38-N4-C28-C29  | -176.8(10) |
| N3-Ir1-C24-C23  | 78.6(7)    | N4-C28-C29-N5   | -2.4(13)   |
| C19-Ir1-C24-C23 | -114.9(8)  | C27-N5-C29-C28  | 3.7(13)    |
| C20-Ir1-C24-C23 | -78.6(8)   | C30-N5-C29-C28  | 175.0(10)  |
| C1-Ir1-C24-C25  | -66(3)     | C29-N5-C30-C31  | 132.4(10)  |
| N3-Ir1-C24-C25  | -160.7(10) | C27-N5-C30-C31  | -57.2(13)  |
| C19-Ir1-C24-C25 | 5.9(10)    | N7-N6-C31-C32   | 2.3(11)    |
| C20-Ir1-C24-C25 | 42.2(11)   | Ir2-N6-C31-C32  | -161.0(7)  |
| C23-Ir1-C24-C25 | 120.8(13)  | N7-N6-C31-C30   | 174.2(9)   |
| C23-C24-C25-C26 | 89.7(18)   | Ir2-N6-C31-C30  | 10.9(13)   |
| Ir1-C24-C25-C26 | 9.7(17)    | N5-C30-C31-N6   | 45.5(13)   |
| C24-C25-C26-C19 | -27(2)     | N5-C30-C31-C32  | -144.2(10) |
| C20-C19-C26-C25 | -48.5(18)  | N6-C31-C32-C33  | -5.0(11)   |
| Ir1-C19-C26-C25 | 30.8(16)   | C30-C31-C32-C33 | -176.4(10) |
| C29-N5-C27-N4   | -3.4(11)   | N6-N7-C33-C32   | -5.0(12)   |
| C30-N5-C27-N4   | -174.7(9)  | Ir3-N7-C33-C32  | -162.6(7)  |
| C29-N5-C27-Ir2  | 179.3(7)   | N6-N7-C33-C34   | 174.2(10)  |
| C30-N5-C27-Ir2  | 7.9(12)    | Ir3-N7-C33-C34  | 16.5(14)   |
| C28-N4-C27-N5   | 1.8(11)    | C31-C32-C33-N7  | 6.0(12)    |
| C38-N4-C27-N5   | 178.7(10)  | C31-C32-C33-C34 | -173.1(11) |
| C28-N4-C27-Ir2  | 178.4(8)   | N7-C33-C34-N8   | 39.9(15)   |
| C38-N4-C27-Ir2  | -4.7(17)   | C32-C33-C34-N8  | -141.1(11) |
| N6-Ir2-C27-N5   | 35.1(7)    | C37-N8-C34-C33  | -51.8(13)  |
| C67-Ir2-C27-N5  | -46.9(12)  | C35-N8-C34-C33  | 129.3(11)  |
| C62-Ir2-C27-N5  | -122.6(8)  | C37-N8-C35-C36  | 0.2(13)    |
| C63-Ir2-C27-N5  | -160.5(7)  | C34-N8-C35-C36  | 179.2(9)   |
| C66-Ir2-C27-N5  | 126(3)     | N8-C35-C36-N9   | -1.6(12)   |
| N6-Ir2-C27-N4   | -141.1(10) | C37-N9-C36-C35  | 2.4(12)    |
| C67-Ir2-C27-N4  | 136.9(11)  | C50-N9-C36-C35  | -174.1(10) |
| C62-Ir2-C27-N4  | 61.3(11)   | C35-N8-C37-N9   | 1.2(11)    |

Electronic Supplementary Information for Dalton Transactions  
This journal is © The Royal Society of Chemistry 2007

|                 |            |                 |            |
|-----------------|------------|-----------------|------------|
| C34-N8-C37-N9   | -177.8(8)  | C41-C42-C43-C38 | 7.3(18)    |
| C35-N8-C37-Ir3  | -178.6(7)  | C41-C42-C43-C47 | 178.4(12)  |
| C34-N8-C37-Ir3  | 2.5(12)    | C38-C39-C44-C45 | -147.8(15) |
| C36-N9-C37-N8   | -2.1(10)   | C40-C39-C44-C45 | 23(2)      |
| C50-N9-C37-N8   | 174.0(10)  | C38-C39-C44-C46 | 77(3)      |
| C36-N9-C37-Ir3  | 177.6(8)   | C40-C39-C44-C46 | -112(2)    |
| C50-N9-C37-Ir3  | -6.3(15)   | C38-C43-C47-C49 | 127.4(12)  |
| C74-Ir3-C37-N8  | -117.0(9)  | C42-C43-C47-C49 | -43.5(15)  |
| N7-Ir3-C37-N8   | 38.3(7)    | C38-C43-C47-C48 | -106.9(11) |
| C75-Ir3-C37-N8  | -155.1(8)  | C42-C43-C47-C48 | 82.2(12)   |
| C71-Ir3-C37-N8  | -42.7(13)  | C37-N9-C50-C55  | 84.3(13)   |
| C70-Ir3-C37-N8  | 130(2)     | C36-N9-C50-C55  | -100.1(12) |
| C74-Ir3-C37-N9  | 63.3(10)   | C37-N9-C50-C51  | -98.0(12)  |
| N7-Ir3-C37-N9   | -141.4(9)  | C36-N9-C50-C51  | 77.7(13)   |
| C75-Ir3-C37-N9  | 25.2(10)   | C55-C50-C51-C52 | -2.3(16)   |
| C71-Ir3-C37-N9  | 137.6(11)  | N9-C50-C51-C52  | -179.9(9)  |
| C70-Ir3-C37-N9  | -50(3)     | C55-C50-C51-C56 | 177.2(10)  |
| C27-N4-C38-C43  | -102.5(12) | N9-C50-C51-C56  | -0.4(15)   |
| C28-N4-C38-C43  | 74.1(14)   | C50-C51-C52-C53 | 0.4(16)    |
| C27-N4-C38-C39  | 86.7(14)   | C56-C51-C52-C53 | -179.1(11) |
| C28-N4-C38-C39  | -96.7(13)  | C51-C52-C53-C54 | 1(2)       |
| C43-C38-C39-C44 | -177.5(12) | C52-C53-C54-C55 | -1(2)      |
| N4-C38-C39-C44  | -7.0(18)   | C51-C50-C55-C54 | 2.6(16)    |
| C43-C38-C39-C40 | 11.0(16)   | N9-C50-C55-C54  | -179.8(10) |
| N4-C38-C39-C40  | -178.5(10) | C51-C50-C55-C59 | -176.7(11) |
| C44-C39-C40-C41 | -178.5(16) | N9-C50-C55-C59  | 0.9(16)    |
| C38-C39-C40-C41 | -7(2)      | C53-C54-C55-C50 | -1.0(17)   |
| C39-C40-C41-C42 | 3(3)       | C53-C54-C55-C59 | 178.3(12)  |
| C40-C41-C42-C43 | -3(2)      | C52-C51-C56-C57 | 73.4(14)   |
| C39-C38-C43-C42 | -12.0(17)  | C50-C51-C56-C57 | -106.1(13) |
| N4-C38-C43-C42  | 177.6(10)  | C52-C51-C56-C58 | -48.3(16)  |
| C39-C38-C43-C47 | 177.7(11)  | C50-C51-C56-C58 | 132.2(12)  |
| N4-C38-C43-C47  | 7.3(15)    | C50-C55-C59-C60 | -148.2(12) |

Electronic Supplementary Information for Dalton Transactions  
This journal is © The Royal Society of Chemistry 2007

|                 |            |                 |            |
|-----------------|------------|-----------------|------------|
| C54-C55-C59-C60 | 32.6(16)   | C27-Ir2-C66-C65 | 62(3)      |
| C50-C55-C59-C61 | 84.9(13)   | N6-Ir2-C66-C65  | 152.8(11)  |
| C54-C55-C59-C61 | -94.3(13)  | C67-Ir2-C66-C65 | -123.6(14) |
| C27-Ir2-C62-C63 | -100.1(7)  | C62-Ir2-C66-C65 | -49.1(12)  |
| N6-Ir2-C62-C63  | 176.6(8)   | C63-Ir2-C66-C65 | -12.2(11)  |
| C67-Ir2-C62-C63 | 108.8(8)   | C65-C66-C67-C68 | -3(2)      |
| C66-Ir2-C62-C63 | 73.1(8)    | Ir2-C66-C67-C68 | -101.1(12) |
| C27-Ir2-C62-C69 | 137.2(11)  | C65-C66-C67-Ir2 | 98.1(13)   |
| N6-Ir2-C62-C69  | 53.9(17)   | C27-Ir2-C67-C66 | 178.6(7)   |
| C67-Ir2-C62-C69 | -13.8(11)  | N6-Ir2-C67-C66  | 97.1(7)    |
| C63-Ir2-C62-C69 | -122.7(14) | C62-Ir2-C67-C66 | -103.6(8)  |
| C66-Ir2-C62-C69 | -49.6(11)  | C63-Ir2-C67-C66 | -67.5(7)   |
| C69-C62-C63-C64 | 0(2)       | C27-Ir2-C67-C68 | -60.7(14)  |
| Ir2-C62-C63-C64 | -103.6(11) | N6-Ir2-C67-C68  | -142.2(10) |
| C69-C62-C63-Ir2 | 103.4(13)  | C62-Ir2-C67-C68 | 17.2(10)   |
| C27-Ir2-C63-C62 | 82.5(8)    | C63-Ir2-C67-C68 | 53.2(11)   |
| N6-Ir2-C63-C62  | -175.2(12) | C66-Ir2-C67-C68 | 120.7(13)  |
| C67-Ir2-C63-C62 | -70.4(8)   | C66-C67-C68-C69 | 63(2)      |
| C66-Ir2-C63-C62 | -104.6(8)  | Ir2-C67-C68-C69 | -20(2)     |
| C27-Ir2-C63-C64 | -159.8(10) | C67-C68-C69-C62 | 9(3)       |
| N6-Ir2-C63-C64  | -57.5(19)  | C63-C62-C69-C68 | -76(2)     |
| C67-Ir2-C63-C64 | 47.3(11)   | Ir2-C62-C69-C68 | 6(2)       |
| C62-Ir2-C63-C64 | 117.7(14)  | C37-Ir3-C70-C71 | -174(2)    |
| C66-Ir2-C63-C64 | 13.1(10)   | C74-Ir3-C70-C71 | 72.1(8)    |
| C62-C63-C64-C65 | 68(2)      | N7-Ir3-C70-C71  | -83.9(7)   |
| Ir2-C63-C64-C65 | -12(2)     | C75-Ir3-C70-C71 | 108.8(8)   |
| C63-C64-C65-C66 | 1(3)       | C37-Ir3-C70-C77 | 72(3)      |
| C64-C65-C66-C67 | -67(2)     | C74-Ir3-C70-C77 | -41.2(11)  |
| C64-C65-C66-Ir2 | 10(2)      | N7-Ir3-C70-C77  | 162.7(11)  |
| C27-Ir2-C66-C67 | -175(3)    | C75-Ir3-C70-C77 | -4.5(11)   |
| N6-Ir2-C66-C67  | -83.6(7)   | C71-Ir3-C70-C77 | -113.3(14) |
| C62-Ir2-C66-C67 | 74.6(8)    | C77-C70-C71-C72 | 1(2)       |
| C63-Ir2-C66-C67 | 111.4(8)   | Ir3-C70-C71-C72 | -104.2(14) |



Electronic Supplementary Information for Dalton Transactions  
This journal is © The Royal Society of Chemistry 2007

|                 |            |                 |            |
|-----------------|------------|-----------------|------------|
| C77-C70-C71-Ir3 | 105.2(10)  | C75-Ir3-C74-C73 | -114.6(13) |
| C37-Ir3-C71-C70 | 177.8(8)   | C71-Ir3-C74-C73 | -7.7(12)   |
| C74-Ir3-C71-C70 | -104.7(8)  | C70-Ir3-C74-C73 | -42.7(12)  |
| N7-Ir3-C71-C70  | 98.2(7)    | C73-C74-C75-C76 | -1(2)      |
| C75-Ir3-C71-C70 | -68.5(8)   | Ir3-C74-C75-C76 | -103.7(13) |
| C37-Ir3-C71-C72 | -55.1(18)  | C73-C74-C75-Ir3 | 102.4(12)  |
| C74-Ir3-C71-C72 | 22.4(14)   | C37-Ir3-C75-C74 | 85.1(7)    |
| N7-Ir3-C71-C72  | -134.7(14) | N7-Ir3-C75-C74  | -173.0(14) |
| C75-Ir3-C71-C72 | 58.6(15)   | C71-Ir3-C75-C74 | -70.4(8)   |
| C70-Ir3-C71-C72 | 127.1(17)  | C70-Ir3-C75-C74 | -104.7(8)  |
| C70-C71-C72-C73 | 51(3)      | C37-Ir3-C75-C76 | -150.6(11) |
| Ir3-C71-C72-C73 | -35(2)     | C74-Ir3-C75-C76 | 124.3(14)  |
| C71-C72-C73-C74 | 29(3)      | N7-Ir3-C75-C76  | -49(2)     |
| C72-C73-C74-C75 | -88(2)     | C71-Ir3-C75-C76 | 53.9(12)   |
| C72-C73-C74-Ir3 | -10(2)     | C70-Ir3-C75-C76 | 19.6(11)   |
| C37-Ir3-C74-C75 | -99.0(7)   | C74-C75-C76-C77 | 50(2)      |
| N7-Ir3-C74-C75  | 176.1(8)   | Ir3-C75-C76-C77 | -32.3(18)  |
| C71-Ir3-C74-C75 | 106.9(8)   | C75-C76-C77-C70 | 29(2)      |
| C70-Ir3-C74-C75 | 71.9(8)    | C71-C70-C77-C76 | -91.6(18)  |
| C37-Ir3-C74-C73 | 146.4(11)  | Ir3-C70-C77-C76 | -13(2)     |
| N7-Ir3-C74-C73  | 61.4(15)   |                 |            |

---

Symmetry transformations used to generate equivalent atoms:

#1 -x+1,y,-z+1
